# Supplementary material for: Prime Editor 3 Mediated Beta-Thalassemia Mutations of the HBB Gene in Human Erythroid Progenitor Cells
Source: MDPI journal article supplement (doi:10.3390/ijms23095002), 2022-04-30
Supplement: s1 [file s1]

## Supplemental data

Prime Editor 3 mediated beta-thalassemia mutations of the *HBB* gene in human erythroid progenitor cells

Haokun Zhang <sup>1</sup>, Qinlinglan Zhou <sup>1</sup>, Hongyan Chen <sup>1, \*</sup>, and Daru Lu <sup>1, 2, \*</sup>

<sup>1</sup> State Key Laboratory of Genetic Engineering, MOE Engineering Research Center of Gene Technology, School of Life Sciences, Fudan University, Shanghai 200438, China; zhanghaokun666@hotmail.com (H.Z.); 21210700056@m.fudan.edu.cn (Q.Z.)

<sup>2</sup> NHC Key Laboratory of Birth Defects and Reproductive Health, Chongqing Key Laboratory of Birth Defects and Reproductive Health, Chongqing Population and Family Planning, Science and Technology Research Institute, Chongqing 404100, China

\* Correspondence: chenhy@fudan.edu.cn (H.C.); drlu@fudan.edu.cn (D.L.)

Supplemental figure 1, related to Figure 1

**a** PE vector structure (e.g.: PE vector inducing the *HBB*\_CD39 mutation)

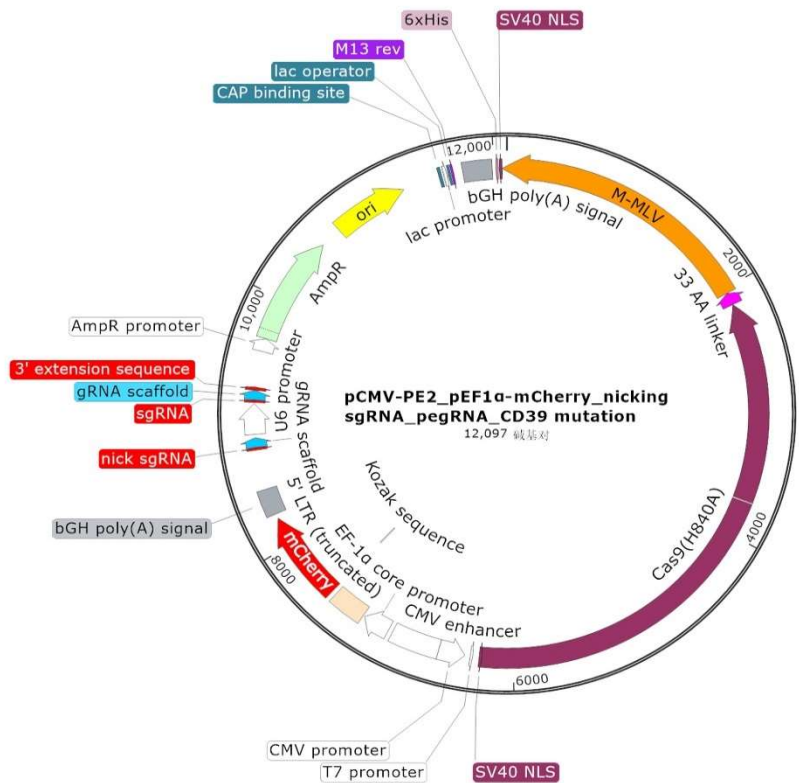

**b** HUDEP-2 cells with PE vector (normal vs. fluorescent visual fields)

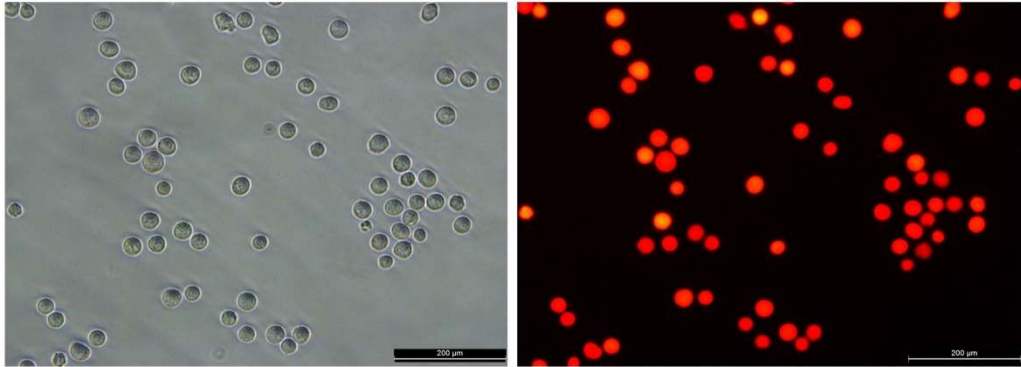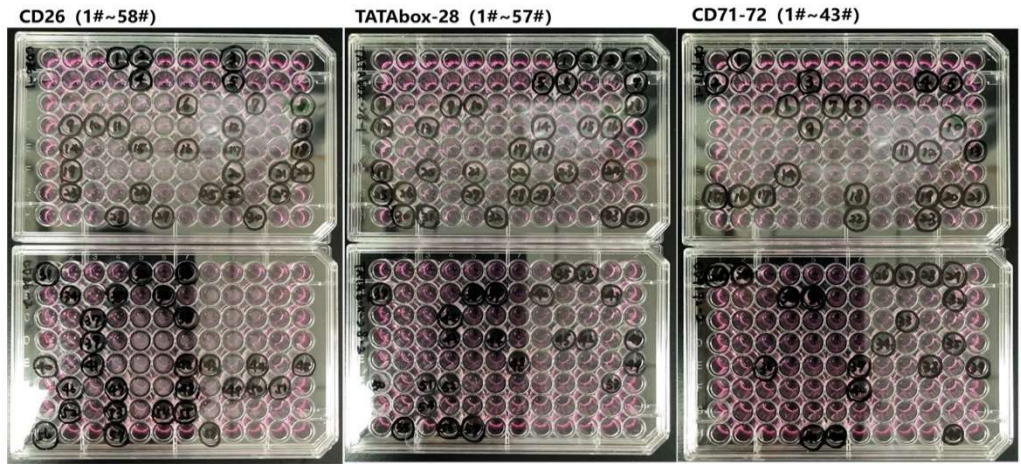

**c****-88 (C>T)** IPE: 4#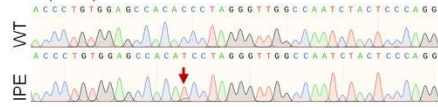**-28 (A>G)** PEI: 7#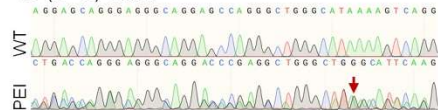**CD1 (-G)** IPE: 19#; PEI: 10#, 11#, 12#, 15#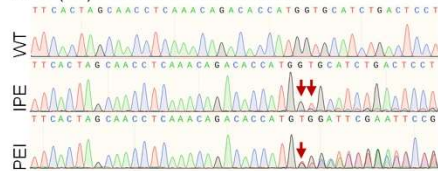**CD6 (-A)** PPE: 13#, 15#, 20#, 24#; PEI: 9#, 10#, 16#, 22#, 23#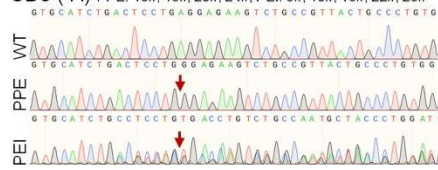**CD17 (A>T)**

F1 IPE: 5#, 6#, 11#, 41#, 47#; PEI: 65#

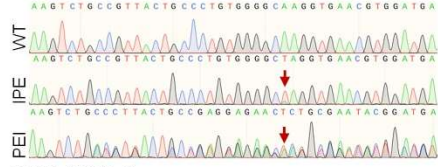

F2 PPE: 1#; IPE: 8#

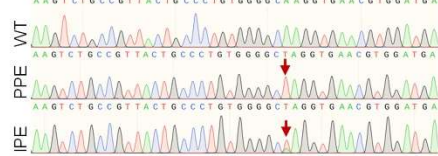**CD19 (A>G)** PPE: 3#, 10#; IPE: 1#, 8#; PEI: 2#, 9#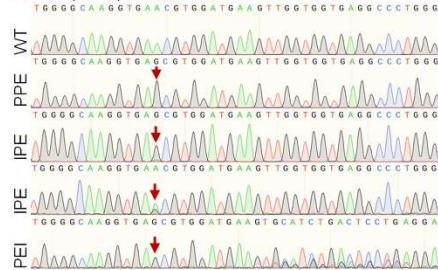**CD26 (G>A)**

F1 IPE: 9#, 12#, 27#

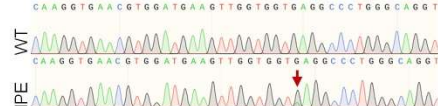

F2 IPE: 13#

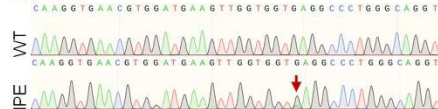**CD27/28 (+C)**

F2 IPE: 1#, 8#, 10#, 11#, 17#

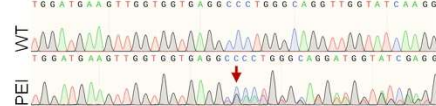**IVS-I-1 (G>A)** PPE: 1#; IPE: 8#, 12#, 1#; PEI: 2#, 13#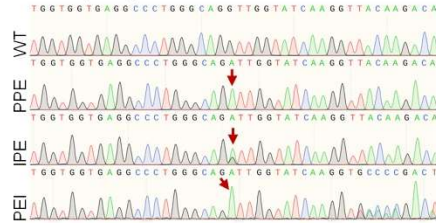**IVS-I-5 (G>C)** PPE: 9#; IPE: 32#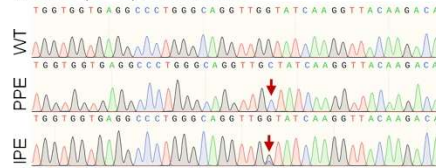**CD39 (C>T)** PPE: 4#; IPE: 14#; PEI: 1#, 3#, 3#, 12#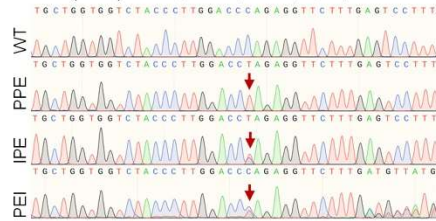**CD41/42 (-TTCT)** PEI: 4#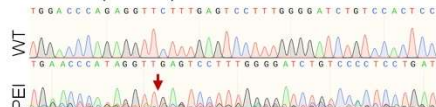**CD71/72 (+A)** PPE: 6#, 17#; IPE: 5#, 21#, 22#, 27#, 35#, 36#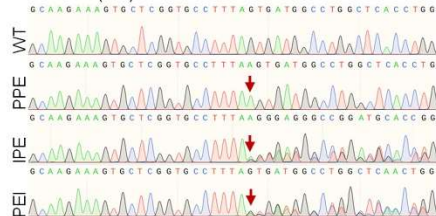**IVS-II-1 (G>A)** PPE: 5#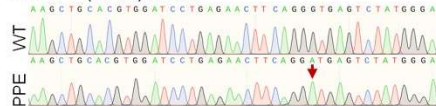**IVS-II-745 (C>G)**

PPE: 11#, 30#, 37#; IPE: 5#, 7#, 14#, 16#, 18#, 26#, 32#; PEI: 2#, 13#, 19#, 31#

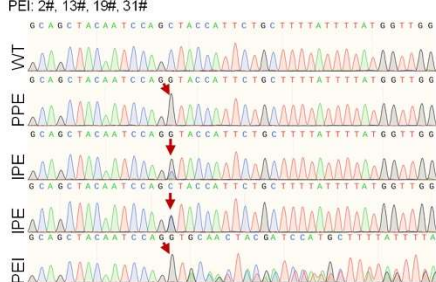

(a) The structure of the PE3 plasmid used in this study. The plasmid contains a nCas9 fused with the engineered M-MLV reverse-transcriptase, reporter gene *mCherry*, Nick sgRNA, and pegRNA. (b) Microscope observation of the HUDEP-2 cells containing the PE3 plasmid. Approximately twenty-four hours after electroporation, the cells express mCherry protein and show bright red fluorescence in the fluorescence field. Scale bar: 200  $\mu\text{m}$ . (c) Sequencing traces of beta-thal clones. Red arrow indicates on-target edits.

## Supplemental figure 2, related to Figure 3

### -88 sgRNA off-target

OT-1

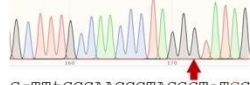

GeTTtGCCAACCTAGGGTaTGG\*

OT-2

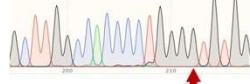

GeTTtGGCCAcCCCTgGGGTGTGG

OT-3

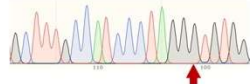

GeTTtGCCAtCCCTAGGGTGTGG

OT-4

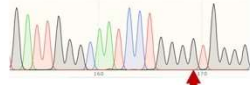

GATTGGgCAAtCCTgGGGTGGGG

OT-5

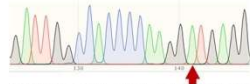

GATTGGCCAcCCCaAGGaTGAGG

OT-1\_WT genome

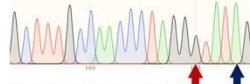

GeTTtGCCAACCTAGGGTaTGG

### Nick sgRNA off-target

OT-1

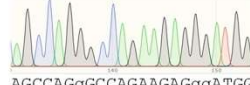

AGCCAGgGCCAGAAGAGgGATGG

OT-2

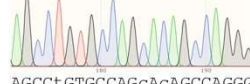

AGCCtGTGCCAGcAcAGCCAGGG

OT-3

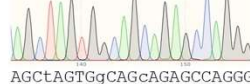

AGCtAGTGgCAGcAGAGCCAGGG

OT-4

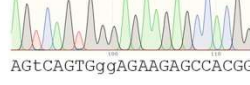

AGtCAGTGgGAGAAGGCCACGG

OT-5

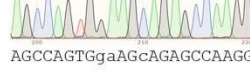

AGCCAGTGgaAGcAGAGCCAAGG

### CD6 sgRNA off-target

OT-1

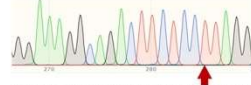

GgAAaGGCAGACTTCTCCTtAGG

OT-2

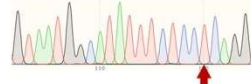

GTAAtGGCAtAtTTCTCCTCAGG

OT-3

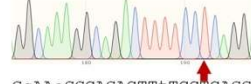

GcAAaGGCAGACTTtTCCTCAGG

OT-4

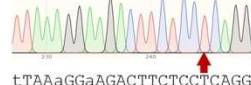

tTAAaGGaAGACTTCTCCTCAGG

### Nick sgRNA off-target

OT-1

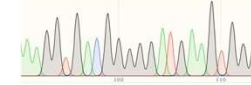

AAGGTGAcgGgGGATGAAGTGGG

OT-2

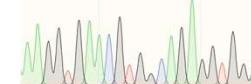

AAGGTGAACGTGGcAGgGTGGG

OT-3

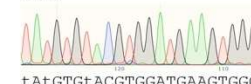

tAtGTGtACGTGGATGAAGTGGG

OT-4

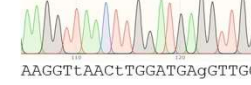

AAGGTtAAcTGGATGAgGTTGG

OT-5

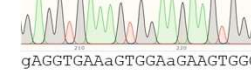

gAGGTGAaAGTGGaAGAGTGGG

### CD17 sgRNA off-target

OT-1

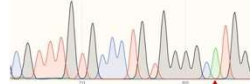

CGTTtTGCCCTGTGGGGCATGG

OT-2

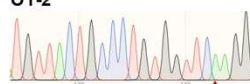

tGTTACTGCCCTGTGGtTCAAGG

OT-3

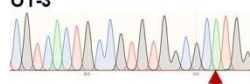

CGTcACTGCCgTGTGGcGCATGG

OT-4

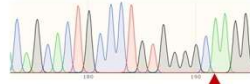

CagcACTGCCCTGTGGGCAAGG

OT-5

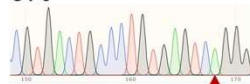

CGTgACTGCCCTGTGaTcCAGGG

### Nick sgRNA off-target

OT-1

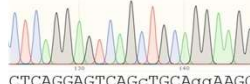

CTCAGGAGTCAGcTGCAGgAAGG

OT-2

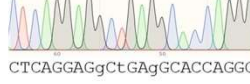

CTCAGGAGgCtGAgGCACCAGGG

OT-3

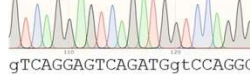

gTCAGGAGTCAGATGgtCCAGGG

OT-4

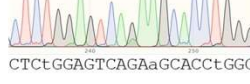

CTcTGGAGTCAGaAGCACcTGGG

OT-1

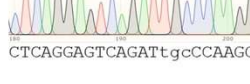

CTCAGGAGTCAGATtgcccAAGG

### CD19 sgRNA off-target

OT-1

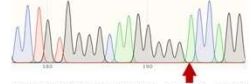

CCTGTGGGGCAAGGgGgACcAGG

OT-2

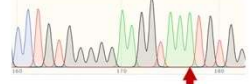

CCTGTGGGGgAAGGTaAAtGTGG

OT-3

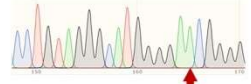

CCTGTaGGGCAtGGgGAACGGGG

OT-4

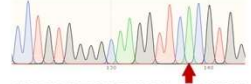

CCTGTGGGGCAAGGTtcACGTGG

OT-1

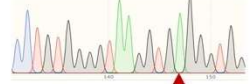

CCTGTGGGGtAAGGTGAggGTGG

### Nick sgRNA off-target

OT-1

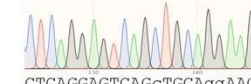

CTCAGGAGTCAGcTGCAGgAAGG

OT-2

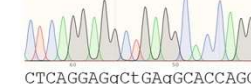

CTCAGGAGgCtGAgGCACCAGGG

OT-3

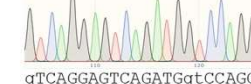

gTCAGGAGTCAGATGgtCCAGGG

OT-4

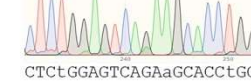

CTcTGGAGTCAGaAGCACcTGGG

OT-5

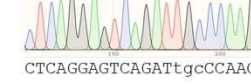

CTCAGGAGTCAGATtgcccAAGG

### CD26 sgRNA off-target

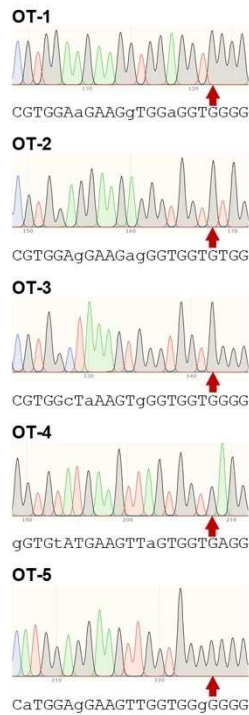

### Nick sgRNA off-target

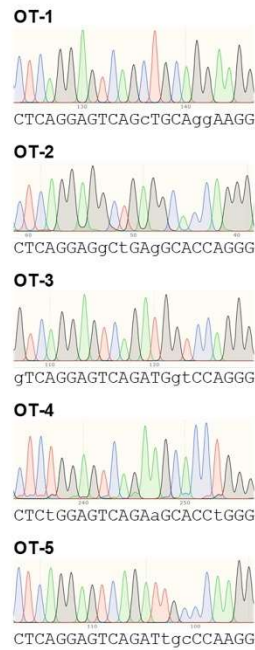

### IVS-I-1 sgRNA off-target

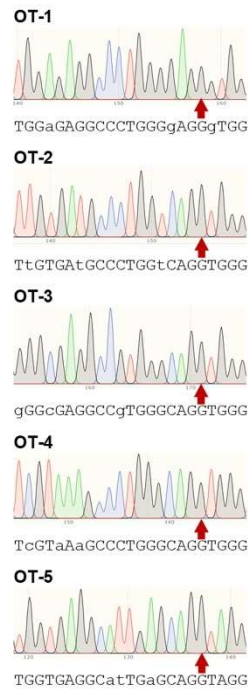

### Nick sgRNA off-target

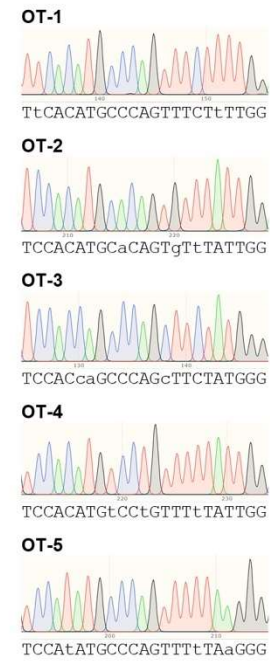

### IVS-I-5 sgRNA off-target

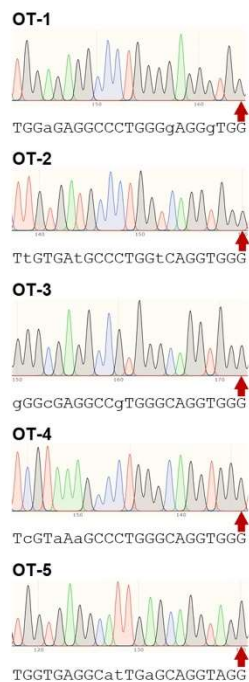

### Nick sgRNA off-target

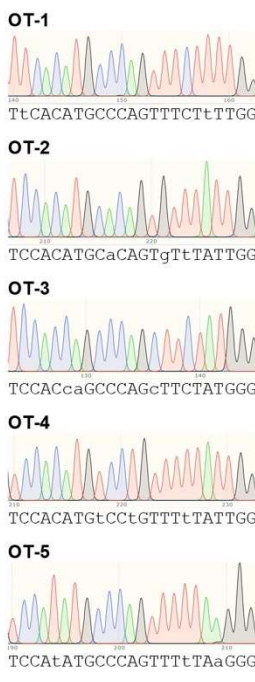

### CD39 sgRNA off-target

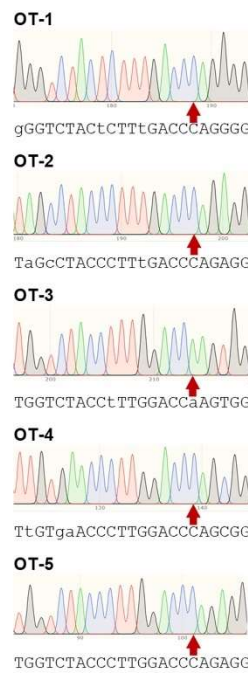

### Nick sgRNA off-target

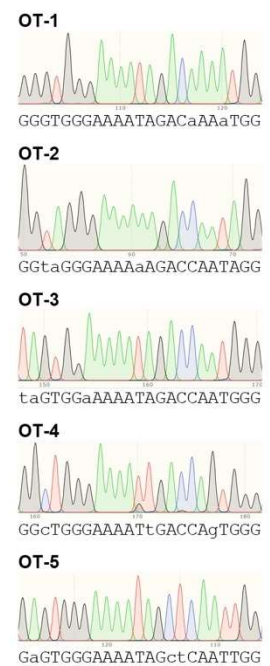

#### CD71/72 sgRNA off-target

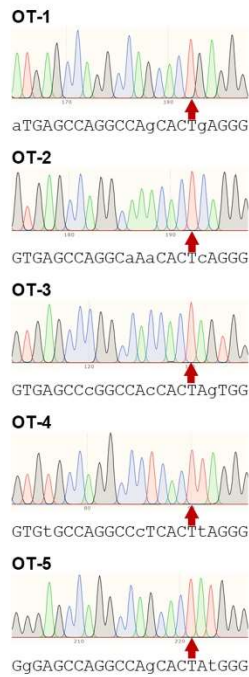

#### Nick sgRNA off-target

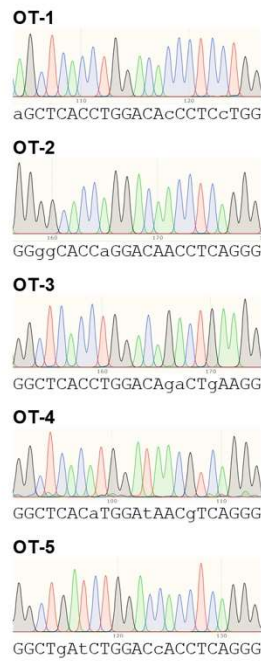

#### IVS-II-1 sgRNA off-target

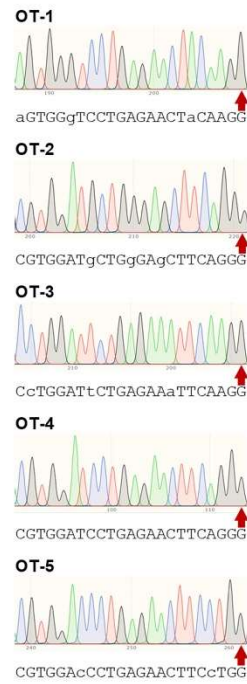

#### Nick sgRNA off-target

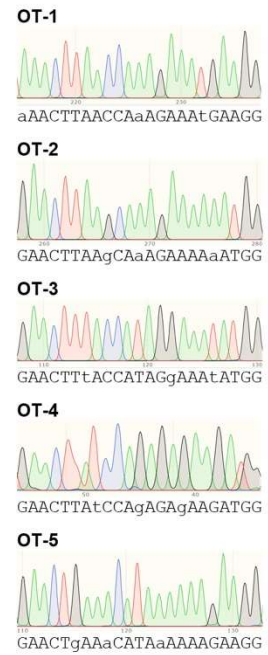

#### IVS-II-745 sgRNA off-target

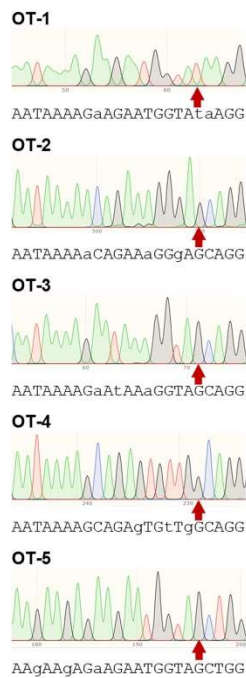

#### Nick sgRNA off-target

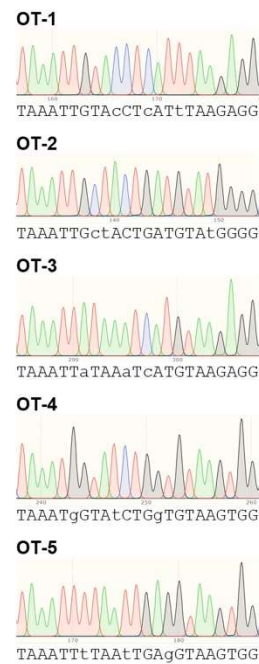

Using the webtool Cas-offinder[25], off-targets were identified with at least three mismatches compared with the on-target sequences. Red arrow indicates the editing position of pegRNA. Asterisk and blue arrow illustrate the single nucleotide polymorphism site in the OT-1 in WT and -88 cells, respectively. Lowercase letters indicate mismatches.

## Supplemental figure 3, related to Figure 4

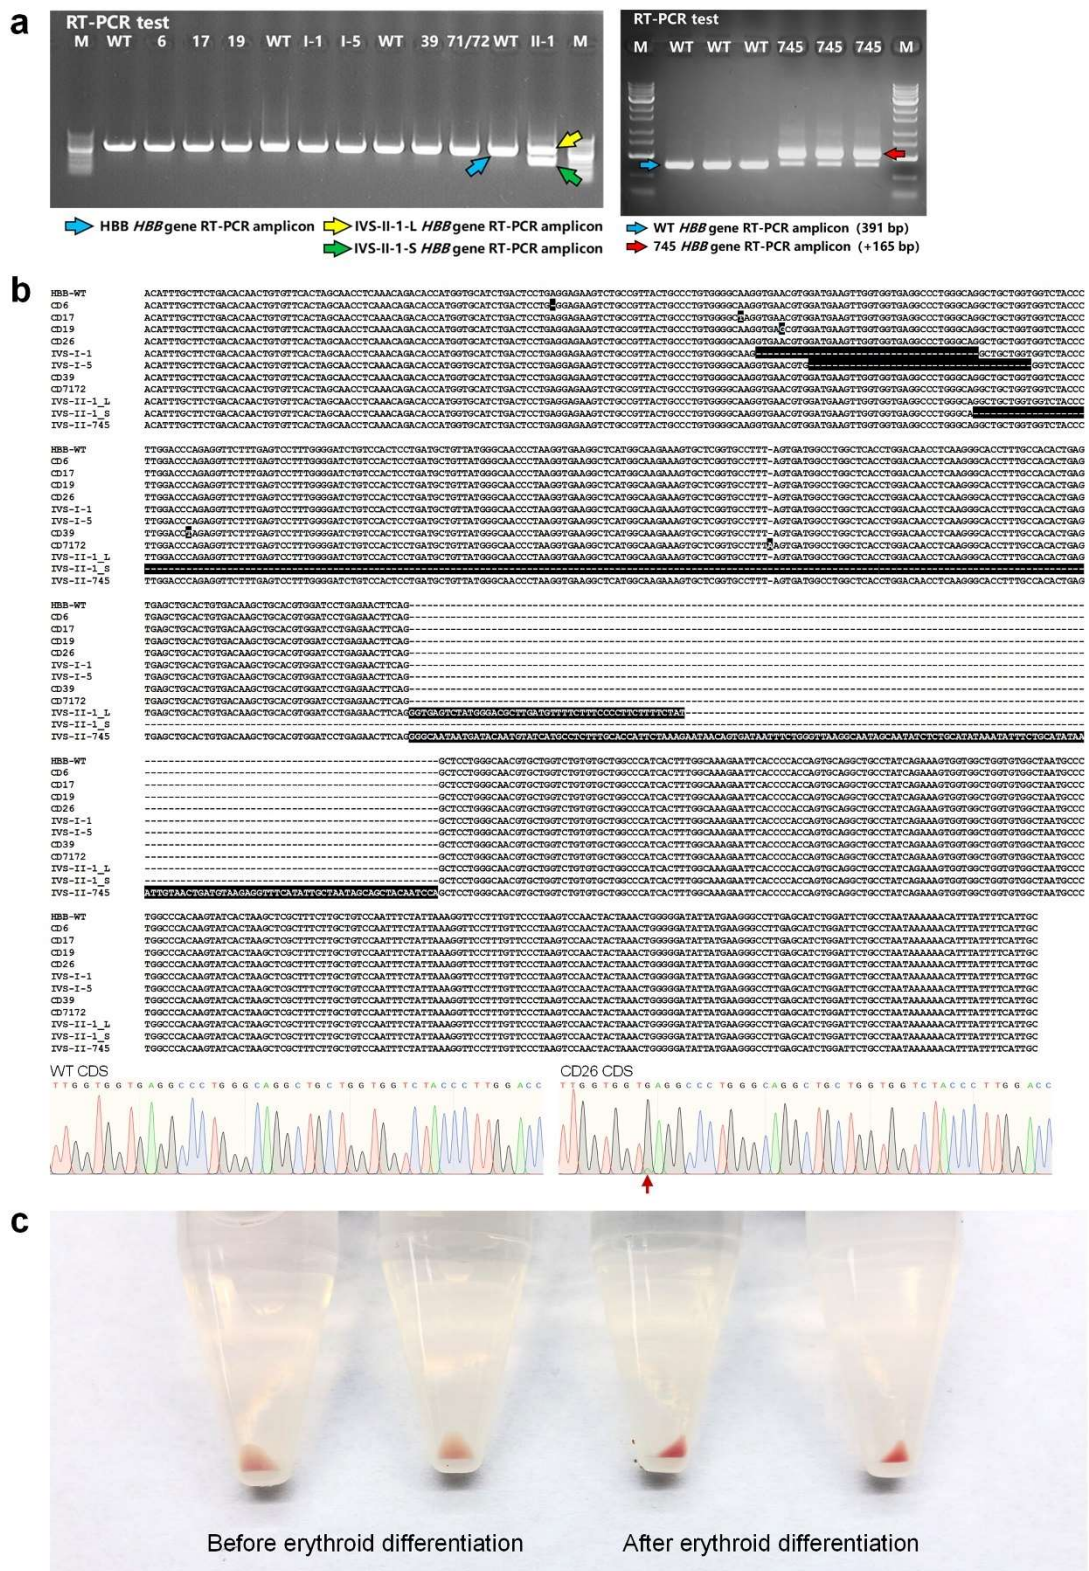

**d** WT HUDEP-2 cells

-88

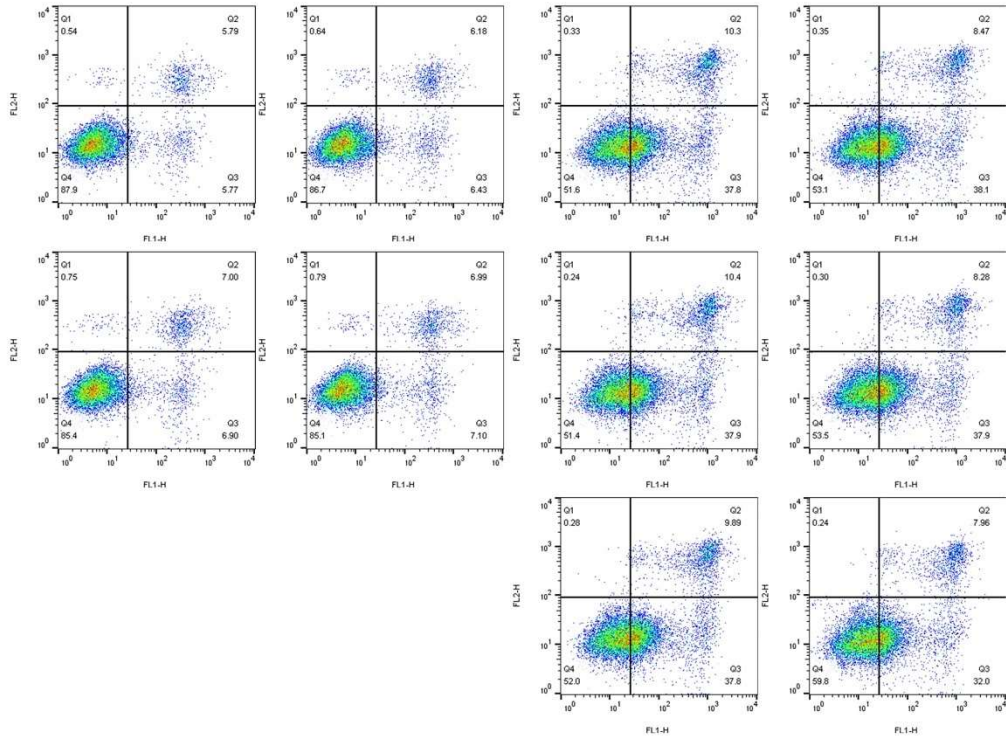

**CD6**

**CD17**

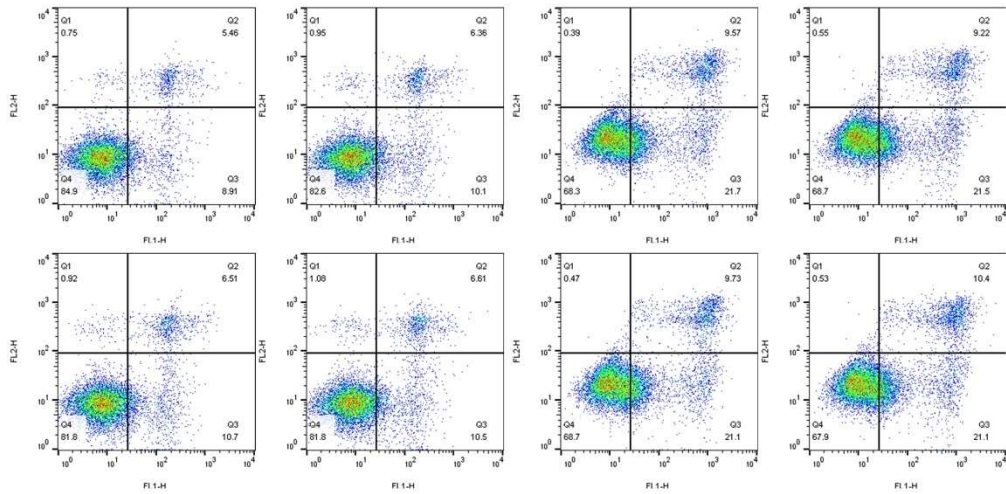

**CD19**

**CD26**

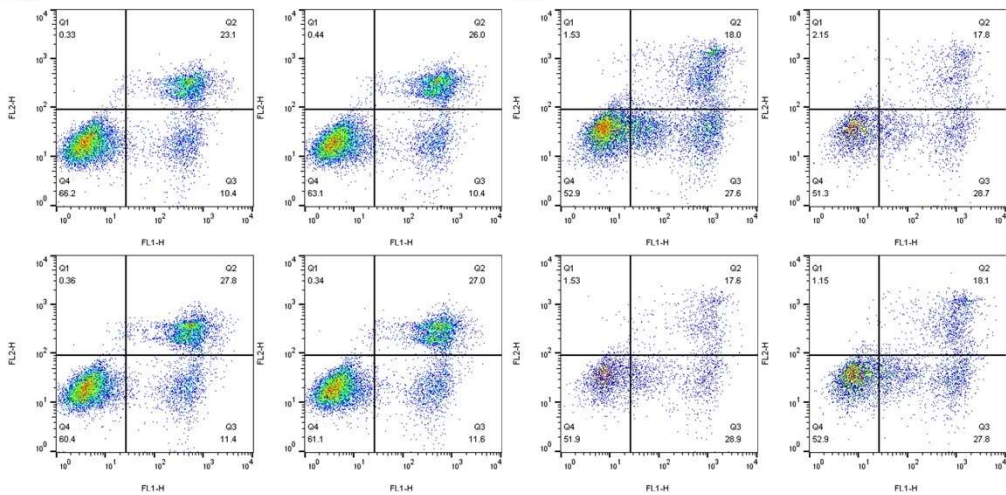

# continuous d

IVS-I-1

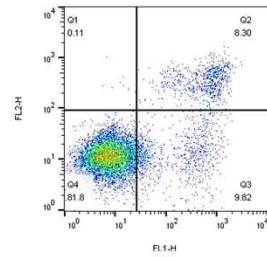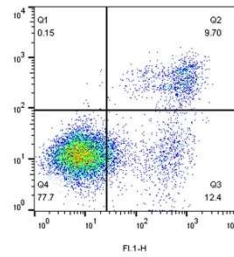

IVS-I-5

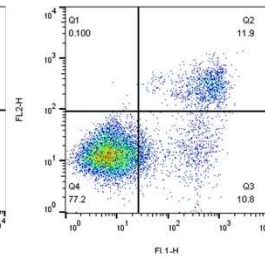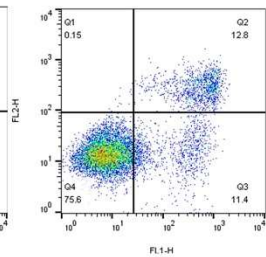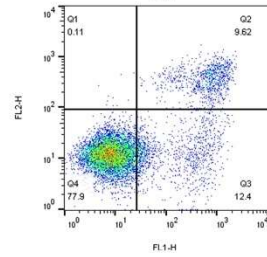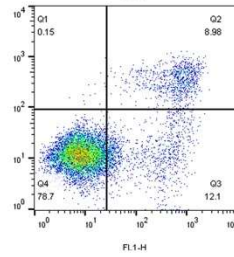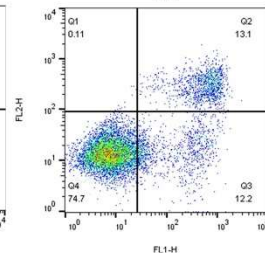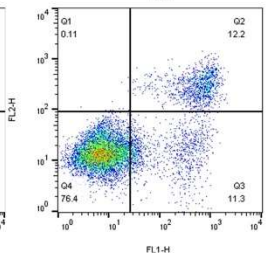

CD39

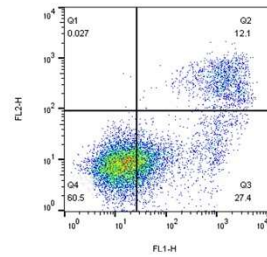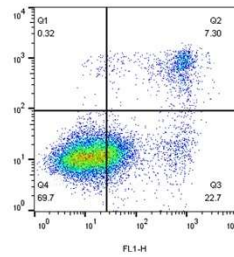

CD71/72

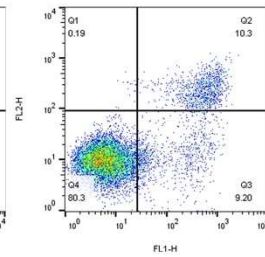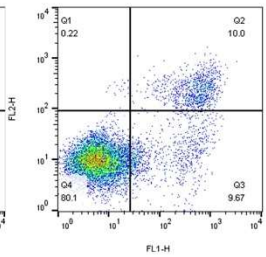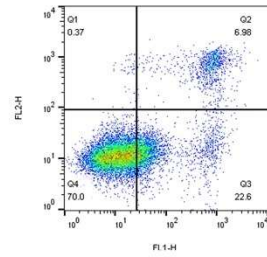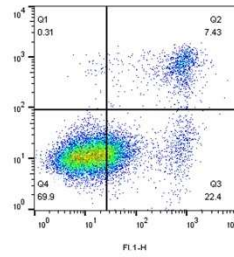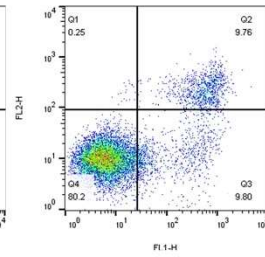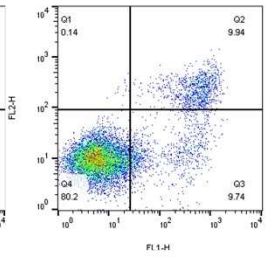

IVS-II-1

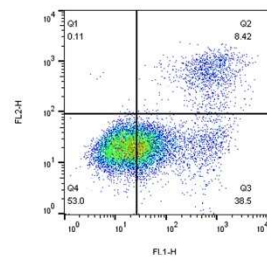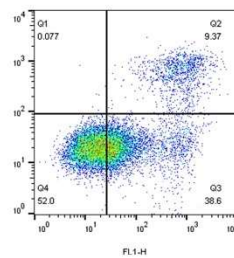

IVS-II-745

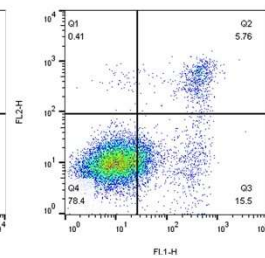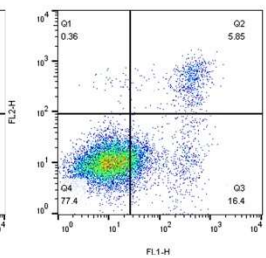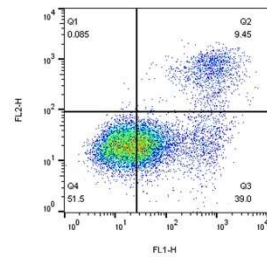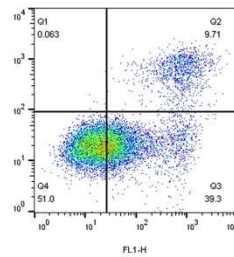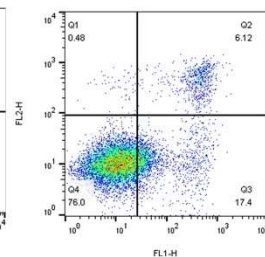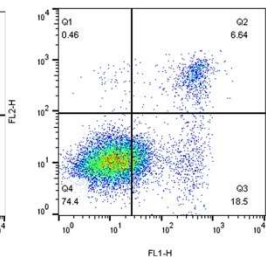

**e**

|            | Viable cells (%) |      |      |      |         | Apoptotic cells (%) |      |      |      |         | Necrotic cells (%) |      |      |      |           |
|------------|------------------|------|------|------|---------|---------------------|------|------|------|---------|--------------------|------|------|------|-----------|
| WT         | 87.9             | 86.7 | 85.4 | 85.1 |         | 5.77                | 6.43 | 6.9  | 7.1  |         | 5.79               | 6.18 | 7    | 6.99 |           |
| -88        | 5.16             | 53.1 | 51.4 | 53.5 | 52 59.8 | 37.8                | 38.1 | 37.9 | 37.9 | 37.8 32 | 10.3               | 8.47 | 10.4 | 8.28 | 9.89 7.96 |
| CD6        | 84.9             | 82.6 | 81.8 | 81.8 |         | 8.91                | 10.1 | 10.7 | 10.5 |         | 5.46               | 6.36 | 6.51 | 6.61 |           |
| CD17       | 68.3             | 68.7 | 68.7 | 67.9 |         | 21.7                | 21.5 | 21.1 | 21.1 |         | 9.57               | 9.22 | 9.73 | 10.4 |           |
| CD19       | 66.2             | 63.1 | 60.4 | 61.1 |         | 10.4                | 10.4 | 11.4 | 11.6 |         | 23.1               | 26   | 27.8 | 27   |           |
| CD26       | 52.9             | 51.3 | 51.9 | 52.9 |         | 27.6                | 28.7 | 28.9 | 27.8 |         | 18                 | 17.8 | 17.6 | 18.1 |           |
| IVS-I-1    | 81.8             | 77.7 | 77.9 | 78.7 |         | 9.82                | 12.4 | 12.4 | 12.1 |         | 8.3                | 9.7  | 9.62 | 8.98 |           |
| IVS-I-5    | 77.2             | 75.6 | 74.7 | 76.4 |         | 10.8                | 11.4 | 12.2 | 11.3 |         | 11.9               | 12.8 | 13.1 | 12.2 |           |
| CD39       | 60.5             | 69.7 | 70   | 69.9 |         | 27.4                | 22.7 | 22.6 | 22.4 |         | 12.1               | 7.3  | 6.98 | 7.43 |           |
| CD71/72    | 80.3             | 80.1 | 80.2 | 80.2 |         | 9.2                 | 9.67 | 9.8  | 9.74 |         | 10.3               | 10   | 9.76 | 9.94 |           |
| IVS-II-1   | 53               | 52   | 51.5 | 51   |         | 38.5                | 38.6 | 39   | 39.3 |         | 8.42               | 9.37 | 9.45 | 9.71 |           |
| IVS-II-745 | 78.4             | 77.4 | 76   | 74.4 |         | 15.5                | 16.4 | 17.4 | 18.5 |         | 5.76               | 5.85 | 6.12 | 6.64 |           |

**f** Cell observation during erythroid differentiation  
WT HUDEP-2 cells

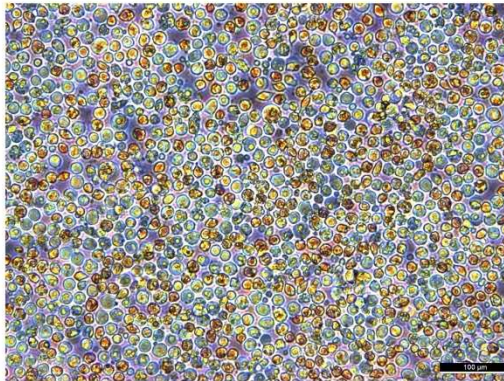

β-thalassemic mutant

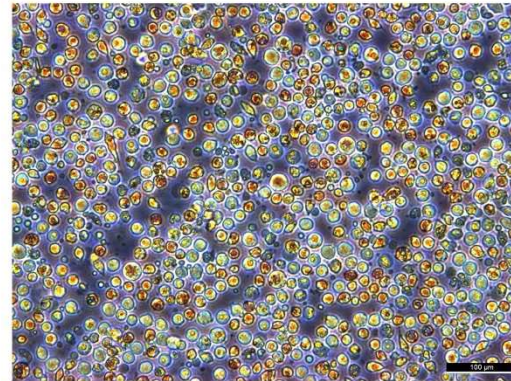

**g** Sampling chips

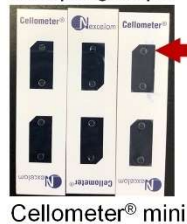

Cellometer® mini

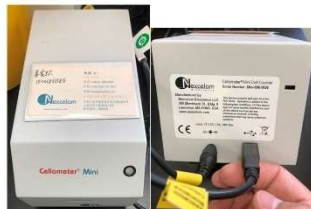

| Sample     | Before erythroid differentiation |          |          | After erythroid differentiation |          |          |
|------------|----------------------------------|----------|----------|---------------------------------|----------|----------|
|            | Repeat 1                         | Repeat 2 | Repeat 3 | Repeat 1                        | Repeat 2 | Repeat 3 |
| WT         | 0.825                            | 0.844    | 0.876    | 0.687                           | 0.71     | 0.698    |
| -88        | 0.575                            | 0.677    | 0.66     | 0.483                           | 0.49     | 0.521    |
| CD6        | 0.489                            | 0.505    | 0.495    | 0.395                           | 0.381    | 0.441    |
| CD17       | 0.618                            | 0.671    | 0.655    | 0.554                           | 0.602    | 0.659    |
| CD19       | 0.606                            | 0.606    | 0.597    | 0.545                           | 0.538    | 0.566    |
| CD26       | 0.463                            | 0.456    | 0.452    | 0.426                           | 0.393    | 0.457    |
| IVS-I-1    | 0.798                            | 0.762    | 0.782    | 0.492                           | 0.407    | 0.411    |
| IVS-I-5    | 0.764                            | 0.748    | 0.673    | 0.582                           | 0.542    | 0.532    |
| CD39       | 0.608                            | 0.617    | 0.629    | 0.423                           | 0.579    | 0.491    |
| CD71/72    | 0.762                            | 0.766    | 0.815    | 0.617                           | 0.621    | 0.648    |
| IVS-II-1   | 0.749                            | 0.68     | 0.712    | 0.548                           | 0.581    | 0.537    |
| IVS-II-745 | 0.677                            | 0.709    | 0.655    | 0.451                           | 0.461    | 0.434    |

(a) Electrophoresis results of RT-PCR amplicons. 6, 17, 19, I-1, I-5, 39, 71/72, II-1, and 745 mean CD6, CD17, CD19, IVS-I-1, IVS-I-5, CD39, CD71/72, and IVS-II-745, respectively. (b) Alignment of RT-PCR sequencing results and sequencing traces of WT and CD26 HBB cDNA. White word with a black background indicates the mutation site. Red arrow indicates the detectable adenine signal in the *HBB* transcript. (c) Observation of HUDEP-2 cells before and after erythroid differentiation. (d) Flow cytometry results for apoptosis analysis. Values displayed in the lower left, lower right, and upper right quadrants are the proportion of viable, apoptotic, and necrotic cells, respectively. (e) Row data of apoptosis analysis. (f) Microscopic examination of WT HUDEP-2 and beta-thal cells during erythropoiesis. More necrotic cells and debris are observed in beta-thal cells. Scale bar: 100 μm. (g) Sampling chip and Cellometer for cell viability analysis. Red arrow indicates the sampling port. Row data of cell viability (%) are shown in the table.

Supplemental figure 4

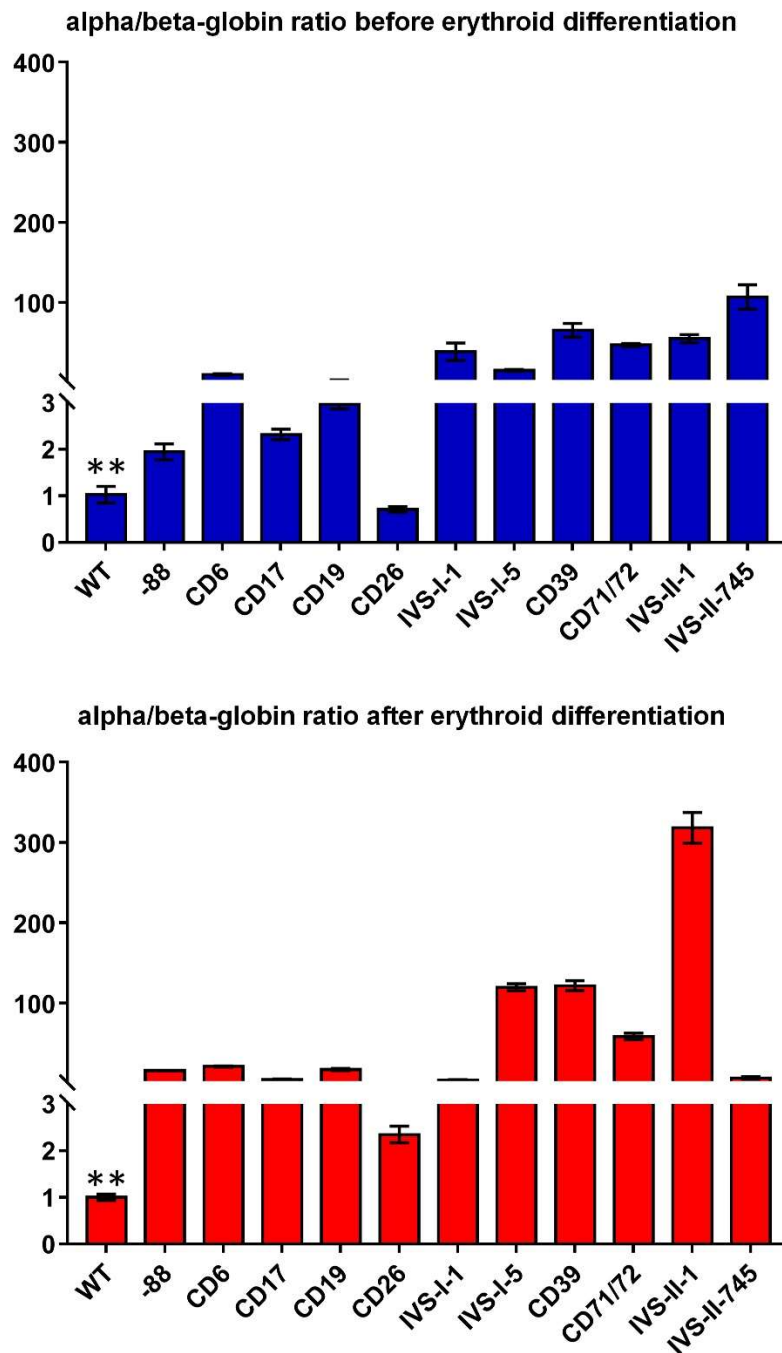

Alpha/beta-globin mRNA ratios of WT HUDEP-2 and beta-thal cells, before and after erythroid differentiation, respectively. All gene expression values were normalized to the *GAPDH* gene (Table S6). *x*-axis shows WT HUDEP-2 and different beta-thal cells, and *y*-axis shows the alpha/beta-globin mRNA ratio (mean  $\pm$  SEM value). \*\* means the *P*-value  $\leq 0.01$  (*t*-test).

**Supplemental Table 1: Formulas of pegRNAs and nick sgRNAs for inducing beta-thalassemic mutations in this study**

| Mutant     | Spacer sequence      | 3' extension sequence (PBS + RT-template)             | Nick sgRNA           | Note      |
|------------|----------------------|-------------------------------------------------------|----------------------|-----------|
| -88        | GATTGGCCAACCCTAGGGTG | GTGGAGCCACATCCTAGGGTTGGC                              | AGCCAGTGCCAGAAGAGCCA |           |
| -28        | CCAATCTACTCCCAGGAGCA | CCTGACTTTCATGCCCAGCCCTGGCTCCTGCCCTCCCTGCTCCTGGGAGTAGA | ACCCTAGGGTGTGGCTCCAC |           |
| CD1        | CTCAGGAGTCAGATGCACCA | GCAACCTCAAACAGACACCATGTGCATCTGACTCCT                  | AGGGCTGGGCATAAAAGTCA |           |
| CD6        | GTAACGGCAGACTTCTCCTC | ATCTGACTCCTGGGAGAAGTCTGCCG                            | AAGGTGAACGTGGATGAAGT |           |
| CD14/15    | GTCTGCCGTTACTGCCCTGT | TCACCTTGCCCCACCAGGGCAGTAACG                           | CTCAGGAGTCAGATGCACCA |           |
| CD17       | TCTGCCGTTACTGCCCTGTG | GTTACCTAGCCCCACAGGGCAGTAACGG                          | CTCAGGAGTCAGATGCACCA | formula 1 |
|            | CGTTACTGCCCTGTGGGGCA | ACGTTACCTAGCCCCACAGGGCA                               | CTCAGGAGTCAGATGCACCA | formula 2 |
| CD19       | CCTGTGGGGCAAGGTGAACG | ACTTCATCCACGCTCACCTTGCCC                              | CTCAGGAGTCAGATGCACCA |           |
| CD26       | AAGGTGAACGTGGATGAAGT | GCCCAGGGCCTTACCACCAACTTCATCCACGTTCA                   | CTTGCCCCACAGGGCAGTAA | formula 1 |
|            | CGTGGATGAAGTTGGTGGTG | GCCCAGGGCCTTACCACCAACTTCATC                           | CTCAGGAGTCAGATGCACCA | formula 2 |
| CD27/28    | AAGGTGAACGTGGATGAAGT | CCTGCCCAGGGGCCTCACCACCAACTTCATCCACGTTCA               | CTTGCCCCACAGGGCAGTAA | formula 1 |
|            | GAAGTTGGTGGTGAGGCCCT | GATACCAACCTGCCCAGGGGCCTCACCACCAAC                     | CTCAGGAGTCAGATGCACCA | formula 2 |
| IVS-I-1    | TGGTGAGGCCCTGGGCAGGT | ACCTTGATACCAATCTGCCCAGGGC                             | TCCACATGCCCAGTTTCTAT |           |
| IVS-I-5    | TGGTGAGGCCCTGGGCAGGT | ACCTTGATAGCAACCTGCCCAGGGC                             | TCCACATGCCCAGTTTCTAT |           |
| IVS-I-6    | TGGTGAGGCCCTGGGCAGGT | ACCTTGATGCCAACCTGCCCAGGGC                             | TCCACATGCCCAGTTTCTAT |           |
| IVS-I-110  | GACCACCAGCAGCCTAAGGG | CTCTCTGCCTATTAGTCTATTTTCCCACCCTTAGGCTGCTGGT           | TGGTCTACCCTTGGACCCAG | formula 1 |
|            | CACTGACTCTCTCTGCCTAT | AAAATAGACTAATAGGCAGAGAGAGTCA                          | GTAGACCACCAGCAGCCTAA | formula 2 |
| CD39       | TGGTCTACCCTTGGACCCAG | TCAAAGAACCTCTAGGTCCAAGGGTA                            | GGGTGGGAAAATAGACCAAT |           |
| CD41/42    | TGGTCTACCCTTGGACCCAG | GGACTCAACCTCTGGGTCCAAGGGTAG                           | GGGTGGGAAAATAGACCAAT | formula 1 |
|            | AGGAGTGGACAGATCCCCAA | GGACCCAGAGTTGAGTCCTTTGGGGATCTGTCCAC                   | GTGCTCGGTGCCTTTAGTGA | formula 2 |
| CD44       | AGGAGTGGACAGATCCCCAA | TCTTTGAGTCTTTGGGGATCTGTCCAC                           | GTGCTCGGTGCCTTTAGTGA |           |
| CD71/72    | GTGAGCCAGGCCATCACTAA | GTGCTCGGTGCCTTTAAGTGATGGCCTGGC                        | GGCTCACCTGGACAACCTCA |           |
| IVS-II-1   | CGTGGATCCTGAGAACTTCA | AGACTCATCCTGAAGTTCTCAGGATCC                           | GAACCTAACCATAGAAAAGA |           |
| IVS-II-654 | CAGTGATAATTTCTGGGTTA | TTGCTATTACCTTAACCCAGAAATTATC                          | AATAAAAGCAGAATGGTAGC | formula 1 |
|            | CAGTGATAATTTCTGGGTTA | GCAGAGATATTGCTATTACCTTAACCCAGAAATTATC                 | GCCCTGAAAGAAAGAGATTA | formula 2 |
|            | CAGTGATAATTTCTGGGTTA | TGCTATTACCTTAACCCAGAAATTATCACTG                       | GCCCTGAAAGAAAGAGATTA | formula 3 |
| IVS-II-745 | AATAAAAGCAGAATGGTAGC | CAATCCAGGTACCATTCTGCTTT                               | TAAATTGTAAGTATGTAAG  |           |

**Supplemental Table 2: The information of pegRNAs and nick sgRNAs inducing beta-thalassemia mutations in this study**

| Mutation   | Formula | Editing % | Editing position (nt) | Nicking position (nt) | Template length (nt) | PBS length (nt) | pegRNA folding, kcal/mol |                  | GC %   |              |            | Tm (°C) |              |            |
|------------|---------|-----------|-----------------------|-----------------------|----------------------|-----------------|--------------------------|------------------|--------|--------------|------------|---------|--------------|------------|
|            |         |           |                       |                       |                      |                 | Initial $\Delta G$       | $\Delta\Delta G$ | sgRN A | 3' extension | Nick sgRNA | sgRN A  | 3' extension | Nick sgRNA |
| -88        |         | 100.00    | 1                     | 52                    | 12                   | 12              | -55.30~-30.40            | 24.9             | 60     | 62.5         | 60         | 67.46   | 74           | 69.65      |
| -28        |         | 0.00      | 31                    | -37                   | 40                   | 13              | -65.50~-34.90            | 30.6             | 55     | 64.15        | 65         | 64.08   | 74.88        | 67.4       |
| CD1        |         | 4.55      | 1                     | 78                    | 22                   | 14              | -53.50~-30.00            | 23.5             | 55     | 50           | 50         | 64.22   | 80.77        | 65.53      |
| CD6        |         | 44.44     | 2                     | -47                   | 13                   | 13              | -53.20~-30.40            | 22.8             | 55     | 57.69        | 45         | 60.42   | 73.92        | 61         |
| CD14/15    |         | 0.00      | 2                     | -39                   | 16                   | 11              | -48.30~-30.20            | 18.1             | 60     | 55           | 55         | 66.4    | 64.86        | 64.22      |
| CD17       | F1      | 7.46      | 8                     | -40                   | 16                   | 13              | -61.80~-30.30            | 31.5             | 60     | 62.07        | 55         | 68.5    | 78.51        | 64.22      |
|            | F2      | 14.29     | 3                     | -45                   | 13                   | 11              | -52.00~-31.50            | 20.5             | 65     | 62.5         | 55         | 72.42   | 76.62        | 64.22      |
| CD19       |         | 57.14     | 1                     | -54                   | 11                   | 13              | -42.80~-21.20            | 21.6             | 65     | 58.33        | 55         | 72.05   | 74.73        | 64.22      |
| CD26       | F1      | 15.79     | 11                    | -31                   | 22                   | 13              | -54.40~-24.00            | 30.4             | 45     | 57.14        | 60         | 61      | 84.45        | 69.27      |
|            | F2      | 50.00     | 3                     | -72                   | 14                   | 13              | -51.30~-21.50            | 29.8             | 55     | 59.26        | 55         | 66.45   | 76.88        | 64.22      |
| CD27/28    | F1      | 0.00      | 16                    | -31                   | 26                   | 13              | -54.40~-25.50            | 28.9             | 45     | 61.54        | 60         | 61      | 69.75        | 69.27      |
|            | F2      | 0.00      | 1                     | -79                   | 19                   | 14              | -61.30~-27.80            | 33.5             | 60     | 63.64        | 55         | 67.51   | 84.44        | 64.22      |
| IVS-I-1    |         | 44.44     | 2                     | 42                    | 15                   | 10              | -49.50~-28.30            | 21.2             | 70     | 56           | 45         | 75.45   | 73.85        | 61.9       |
| IVS-I-5    |         | 100.00    | 6                     | 42                    | 15                   | 10              | -55.10~-31.00            | 24.1             | 70     | 60           | 45         | 75.45   | 75.61        | 61.9       |
| IVS-I-6    |         | 0.00      | 7                     | 42                    | 15                   | 10              | -53.60~-28.90            | 24.7             | 70     | 64           | 45         | 75.45   | 79.81        | 61.9       |
| IVS-I-110  | F1      | 0.00      | 17                    | -29                   | 30                   | 13              | -63.10~-30.30            | 32.8             | 65     | 48.84        | 60         | 68.01   | 65.97        | 66.11      |
|            | F2      | 0.00      | 5                     | 24                    | 14                   | 14              | -55.30~-24.70            | 30.6             | 50     | 35.71        | 55         | 56.01   | 61.66        | 61.82      |
| CD39       |         | 18.18     | 1                     | -46                   | 14                   | 12              | -46.60~-25.70            | 20.9             | 60     | 46.15        | 45         | 66.11   | 67.44        | 61.33      |
| CD41/42    | F1      | 0.00      | 7                     | -46                   | 14                   | 13              | -59.00~-33.50            | 25.5             | 60     | 59.26        | 45         | 66.11   | 73.52        | 61.33      |
|            | F2      | 0.00      | 13                    | -79                   | 23                   | 13              | -56.90~-36.00            | 20.9             | 55     | 58.33        | 55         | 65.8    | 82.87        | 65.24      |
| CD44       |         | 0.00      | 5                     | -79                   | 14                   | 13              | -53.20~-24.80            | 28.4             | 55     | 48.15        | 55         | 65.8    | 71.6         | 65.24      |
| CD71/72    |         | 44.44     | 1                     | -27                   | 17                   | 13              | -57.60~-25.50            | 32.1             | 55     | 60           | 60         | 65.12   | 81.15        | 67.67      |
| IVS-II-1   |         | 50.00     | 6                     | 44                    | 13                   | 14              | -53.90~-26.00            | 27.9             | 50     | 48.15        | 30         | 62.86   | 68.55        | 50.08      |
| IVS-II-654 | F1      | 0.00      | 7                     | 99                    | 15                   | 13              | -43.10~-26.00            | 17.1             | 35     | 32.14        | 35         | 54.1    | 63.02        | 55.15      |
|            | F2      | 0.00      | 7                     | -82                   | 24                   | 13              | -46.30~-20.80            | 25.5             | 35     | 35.14        | 40         | 54.1    | 58.09        | 57.53      |
|            | F3      | 0.00      | 7                     | -82                   | 14                   | 17              | -52.00~-28.90            | 23.1             | 35     | 35.48        | 40         | 54.1    | 66.93        | 57.53      |
| IVS-II-745 |         | 43.48     | 2                     | 39                    | 10                   | 13              | -44.00~-23.30            | 20.7             | 35     | 43.48        | 25         | 55.15   | 64.91        | 46.63      |

**Supplemental Table 3: Search results of Cas-OFFinder for off-target examination in this study**

| -88 sgRNA      | crRNA                   | DNA                     | Chromosome | Position  | Direction | Mismatches | Bulge Size |
|----------------|-------------------------|-------------------------|------------|-----------|-----------|------------|------------|
| No.1           | GATTGGCCAACCCTAGGGTGNGG | GcTTtGCCAACCCTAGGGTaTGG | chr15      | 44910699  | +         | 3          | 0          |
| No.2           | GATTGGCCAACCCTAGGGTGNGG | GcTTGGCCAcCCCTgGGGTGTGG | chr20      | 61796608  | +         | 3          | 0          |
| No.3           | GATTGGCCAACCCTAGGGTGNGG | GcTTtGCCAtCCCTAGGGTGTGG | chr1       | 63259619  | -         | 3          | 0          |
| No.4           | GATTGGCCAACCCTAGGGTGNGG | GATTGGgCAAtCCTgGGGTGGGG | chr1       | 88388885  | +         | 3          | 0          |
| No.5           | GATTGGCCAACCCTAGGGTGNGG | GATTGGCCAcCCCaAGGaTGAGG | chr4       | 17714017  | -         | 3          | 0          |
| No.6           | GATTGGCCAACCCTAGGGTGNGG | ttTTGGCCAACCCTgGGGTGGGG | chrX       | 17687669  | -         | 3          | 0          |
| No.7           | GATTGGCCAACCCTAGGGTGNGG | GATTGGCCAACCCTAGGGTGTGG | chr11      | 5227141   | +         | 0          | 0          |
| No.8           | GATTGGCCAACCCTAGGGTGNGG | GATTGGCCAACaaTAGGGaGTGG | chr11      | 96034018  | -         | 3          | 0          |
| No.9           | GATTGGCCAACCCTAGGGTGNGG | cAgTGGaCAACCCTAGGGTGGGG | chr11      | 119312998 | -         | 3          | 0          |
| No.10          | GATTGGCCAACCCTAGGGTGNGG | cATeGGCCAAtCCTAGGGTGGGG | chr10      | 101589028 | -         | 3          | 0          |
| No.11          | GATTGGCCAACCCTAGGGTGNGG | GAcTGGCCAACCTcAGGGTGGGG | chr19      | 16883771  | -         | 3          | 0          |
|                |                         |                         |            |           |           |            |            |
| -88 nick sgRNA | crRNA                   | DNA                     | Chromosome | Position  | Direction | Mismatches | Bulge Size |
| No.1           | AGCCAGTGCCAGAAGAGCCANGG | AGCCAGgGCCAGAAGAGggATGG | chr8       | 6850407   | +         | 3          | 0          |
| No.2           | AGCCAGTGCCAGAAGAGCCANGG | AGCCtGTGCCAGcAcAGCCAGGG | chr8       | 143515883 | -         | 3          | 0          |
| No.3           | AGCCAGTGCCAGAAGAGCCANGG | AGCtAGTGgCAGcAGAGCCAGGG | chr15      | 77654706  | -         | 3          | 0          |
| No.4           | AGCCAGTGCCAGAAGAGCCANGG | AGtCAGTGggAGAAGAGCCACGG | chr1       | 25614534  | +         | 3          | 0          |
| No.5           | AGCCAGTGCCAGAAGAGCCANGG | AGCCAGTGgaAGcAGAGCCAAGG | chr1       | 83994288  | -         | 3          | 0          |
| No.6           | AGCCAGTGCCAGAAGAGCCANGG | AGaCAGTGCCAGAAGAGaCtTGG | chr1       | 236523416 | -         | 3          | 0          |
| No.7           | AGCCAGTGCCAGAAGAGCCANGG | AGCCAGTtCcTGAaAGCCACGG  | chr7       | 130153537 | +         | 3          | 0          |
| No.8           | AGCCAGTGCCAGAAGAGCCANGG | AGCaAtTGCCAGtAGAGCCATGG | chr2       | 10136036  | -         | 3          | 0          |
| No.9           | AGCCAGTGCCAGAAGAGCCANGG | tGCCAGaGgCAGAAGAGCCAGGG | chr2       | 46460323  | +         | 3          | 0          |
| No.10          | AGCCAGTGCCAGAAGAGCCANGG | AGgCAGTGCCAGAgGAGaCAGGG | chr2       | 46963181  | -         | 3          | 0          |
| No.11          | AGCCAGTGCCAGAAGAGCCANGG | AGgCAGTGgCAGAAGAGCaAAGG | chr2       | 54927873  | -         | 3          | 0          |
| No.12          | AGCCAGTGCCAGAAGAGCCANGG | AcCCtGTGCCAGAAGAGCCAGGG | chr2       | 109062964 | +         | 2          | 0          |
| No.13          | AGCCAGTGCCAGAAGAGCCANGG | AGCaAGTGCCcGcAGAGCCAGGG | chr2       | 120346945 | -         | 3          | 0          |
| No.14          | AGCCAGTGCCAGAAGAGCCANGG | AGCCtGTGaCAGAAGAGCtACGG | chr12      | 13912172  | -         | 3          | 0          |
| No.15          | AGCCAGTGCCAGAAGAGCCANGG | gcCCAGTGCCAGAAGAGaCATGG | chr12      | 124399310 | +         | 3          | 0          |
| No.16          | AGCCAGTGCCAGAAGAGCCANGG | AGCCAGgGCCAGAgGAGCCgAGG | chr9       | 96074155  | -         | 3          | 0          |
| No.17          | AGCCAGTGCCAGAAGAGCCANGG | AGCCtGTGtCAGcAGAGCCAAGG | chrX       | 132875545 | +         | 3          | 0          |
| No.18          | AGCCAGTGCCAGAAGAGCCANGG | tGtCAGTGCCAGcAGAGCCAGGG | chr14      | 58152286  | -         | 3          | 0          |
| No.19          | AGCCAGTGCCAGAAGAGCCANGG | AcCCAGTtCCAGAAaAGCCAGGG | chr14      | 105586251 | -         | 3          | 0          |

|                |                         |                         |            |           |           |            |            |
|----------------|-------------------------|-------------------------|------------|-----------|-----------|------------|------------|
| No.20          | AGCCAGTGCCAGAAGAGCCANGG | AcCCAGTtCCAGAAaAGCCAGGG | chr14      | 105706482 | -         | 3          | 0          |
| No.21          | AGCCAGTGCCAGAAGAGCCANGG | AGCCAcTtCtGAAGAGCCAGGG  | chr6       | 66382411  | +         | 3          | 0          |
| No.22          | AGCCAGTGCCAGAAGAGCCANGG | AGCCAGTGgCAGAAGAGggATGG | chr6       | 168374299 | -         | 3          | 0          |
| No.23          | AGCCAGTGCCAGAAGAGCCANGG | AGCCAGTtCAGAAGAGCCcAGG  | chr11      | 2094618   | -         | 3          | 0          |
| No.24          | AGCCAGTGCCAGAAGAGCCANGG | AGCCAGTGCCAGAAGAGCCAAGG | chr11      | 5227204   | -         | 0          | 0          |
| No.25          | AGCCAGTGCCAGAAGAGCCANGG | AGCCAaaGCCtGAAGAGCCAAGG | chr13      | 24996610  | +         | 3          | 0          |
| No.26          | AGCCAGTGCCAGAAGAGCCANGG | AGgCAGTGagAGAAGAGCCAGGG | chr13      | 98224738  | +         | 3          | 0          |
|                |                         |                         |            |           |           |            |            |
| CD6 sgRNA      | crRNA                   | DNA                     | Chromosome | Position  | Direction | Mismatches | Bulge Size |
| No.1           | GTAACGGCAGACTTCTCCTCNGG | GgAAaGGCAGACTTCTCCTtAGG | chr5       | 56751342  | -         | 3          | 0          |
| No.2           | GTAACGGCAGACTTCTCCTCNGG | GTAAtGGCAtAtTTCTCCTCAGG | chr1       | 227706689 | +         | 3          | 0          |
| No.3           | GTAACGGCAGACTTCTCCTCNGG | GcAAaGGCAGACTTtTCCTCAGG | chr6       | 11370393  | -         | 3          | 0          |
| No.4           | GTAACGGCAGACTTCTCCTCNGG | GTAACGGCAGACTTCTCCTCAGG | chr11      | 5226983   | +         | 0          | 0          |
| No.5           | GTAACGGCAGACTTCTCCTCNGG | tTAAaGGaAGACTTCTCCTCAGG | chr3       | 182066119 | -         | 3          | 0          |
|                |                         |                         |            |           |           |            |            |
| CD6 nick sgRNA | crRNA                   | DNA                     | Chromosome | Position  | Direction | Mismatches | Bulge Size |
| No.1           | AAGGTGAACGTGGATGAAGTNNG | AAGGTGAcgGgGGATGAAGTGGG | chr1       | 36122669  | -         | 3          | 0          |
| No.2           | AAGGTGAACGTGGATGAAGTNNG | AAGGTGAACGTGGcaGAgGTGGG | chr1       | 119326861 | +         | 3          | 0          |
| No.3           | AAGGTGAACGTGGATGAAGTNNG | tAtGTGtACGTGGATGAAGTGGG | chr2       | 60542664  | +         | 3          | 0          |
| No.4           | AAGGTGAACGTGGATGAAGTNNG | AAGGTtAAcTGGATGAgGTTGG  | chr2       | 196541035 | -         | 3          | 0          |
| No.5           | AAGGTGAACGTGGATGAAGTNNG | gAGGTGAAaGTGGAaGAAGTGGG | chr2       | 240945918 | -         | 3          | 0          |
| No.6           | AAGGTGAACGTGGATGAAGTNNG | AAGGTGcAgGTGGgTGAAGTGGG | chr17      | 63593297  | -         | 3          | 0          |
| No.7           | AAGGTGAACGTGGATGAAGTNNG | AAGGTGAgCGTGGAgGcAGTGGG | chr16      | 85601541  | -         | 3          | 0          |
| No.8           | AAGGTGAACGTGGATGAAGTNNG | AAGGaaAACGTGGAgGAAGTCGG | chr14      | 64338866  | -         | 3          | 0          |
| No.9           | AAGGTGAACGTGGATGAAGTNNG | AAGGTGAACGaGGATGAgGaAGG | chr6       | 5849912   | -         | 3          | 0          |
| No.10          | AAGGTGAACGTGGATGAAGTNNG | AAaGTGAACGTGGATGcAGTTGG | chr11      | 5234359   | -         | 2          | 0          |
| No.11          | AAGGTGAACGTGGATGAAGTNNG | AAGGTGAACGTGGATGAAGTTGG | chr11      | 5226947   | -         | 0          | 0          |
| No.12          | AAGGTGAACGTGGATGAAGTNNG | AAtGTGAAtGTGGATGAAaTGGG | chr11      | 18570832  | -         | 3          | 0          |
| No.13          | AAGGTGAACGTGGATGAAGTNNG | AAtGTGAACGTGGATGAAaTGG  | chr10      | 60586199  | +         | 3          | 0          |
| No.14          | AAGGTGAACGTGGATGAAGTNNG | AAGGTGAAtGTGGAgtAAGTGGG | chr18      | 63706608  | +         | 3          | 0          |
| No.15          | AAGGTGAACGTGGATGAAGTNNG | AAaGTGAcCtTGGATGAAGTTGG | chr3       | 6827641   | -         | 3          | 0          |
|                |                         |                         |            |           |           |            |            |
| CD17 sgRNA     | crRNA                   | DNA                     | Chromosome | Position  | Direction | Mismatches | Bulge Size |
| No.1           | CGTTACTGCCCTGTGGGGCANGG | CGTTtgTGCCCTGTGGGGCATGG | chr5       | 77084750  | -         | 2          | 0          |
| No.2           | CGTTACTGCCCTGTGGGGCANGG | tGTTACTGCCCTGTGGttCAAGG | chr1       | 46263647  | +         | 3          | 0          |

|            |                         |                          |            |           |           |            |            |
|------------|-------------------------|--------------------------|------------|-----------|-----------|------------|------------|
| No.3       | CGTTACTGCCCTGTGGGGCANGG | CGTcACTGCCgTGTGGcGCATGG  | chr2       | 23314251  | -         | 3          | 0          |
| No.4       | CGTTACTGCCCTGTGGGGCANGG | CagcACTGCCCTGTGGGGCAAGG  | chr2       | 237360397 | +         | 3          | 0          |
| No.5       | CGTTACTGCCCTGTGGGGCANGG | CGTgACTGCCCTGTGaGtCAGGG  | chr6       | 156836330 | +         | 3          | 0          |
| No.6       | CGTTACTGCCCTGTGGGGCANGG | CGTTACTGCCCTGTGGGGCAAGG  | chr11      | 5226966   | -         | 0          | 0          |
| No.7       | CGTTACTGCCCTGTGGGGCANGG | CGTcACTGaCCTGTGGGGCcAGG  | chr19      | 40783764  | -         | 3          | 0          |
| No.8       | CGTTACTGCCCTGTGGGGCANGG | gGTccCTGCCCTGTGGGGCAGGG  | chr18      | 48170923  | -         | 3          | 0          |
|            |                         |                          |            |           |           |            |            |
| CD19 sgRNA | crRNA                   | DNA                      | Chromosome | Position  | Direction | Mismatches | Bulge Size |
| No.1       | CCTGTGGGGCAAGGTGAACGNNG | CCTGTGGGGCAAGGgGgACcAGG  | chr1       | 3709556   | +         | 3          | 0          |
| No.2       | CCTGTGGGGCAAGGTGAACGNNG | CCTGTGGGGgAAGGTaAAtGTGG  | chr1       | 6965456   | +         | 3          | 0          |
| No.3       | CCTGTGGGGCAAGGTGAACGNNG | CCTGTaGGGCAtGGgGAACGGGG  | chr1       | 10719591  | +         | 3          | 0          |
| No.4       | CCTGTGGGGCAAGGTGAACGNNG | CCTGTGGGGCAAGGTtACGTGG   | chr1       | 56356790  | +         | 2          | 0          |
| No.5       | CCTGTGGGGCAAGGTGAACGNNG | CCTGTGGGGtAAGGTGAaggGTGG | chr1       | 175868998 | +         | 3          | 0          |
| No.6       | CCTGTGGGGCAAGGTGAACGNNG | CCTcTGGaGCAAGGTGAAGGTGG  | chr1       | 233083163 | +         | 3          | 0          |
| No.7       | CCTGTGGGGCAAGGTGAACGNNG | aagGTGGGGCAAGGTGAACGGGG  | chr22      | 48118787  | -         | 3          | 0          |
| No.8       | CCTGTGGGGCAAGGTGAACGNNG | CCTGTGGGGgAAGGTcAAAtGGGG | chr2       | 51712473  | -         | 3          | 0          |
| No.9       | CCTGTGGGGCAAGGTGAACGNNG | CCTGTGGGGCAgGGgGAAGGGGG  | chr12      | 5589684   | +         | 3          | 0          |
| No.10      | CCTGTGGGGCAAGGTGAACGNNG | CCTGTGGGGgAAGGTGAaggGGGG | chr12      | 70127565  | -         | 3          | 0          |
| No.11      | CCTGTGGGGCAAGGTGAACGNNG | CCTGTGGGaCAAGGctAACGTGG  | chrX       | 16693369  | +         | 3          | 0          |
| No.12      | CCTGTGGGGCAAGGTGAACGNNG | CCTGTGGaGCAAGagGAACGTGG  | chrX       | 39991392  | -         | 3          | 0          |
| No.13      | CCTGTGGGGCAAGGTGAACGNNG | CCTGTGGGGCAAGGTGAACGTGG  | chr11      | 5226957   | -         | 0          | 0          |
| No.14      | CCTGTGGGGCAAGGTGAACGNNG | CCTGTGGGGCAaAGTGAACGTGG  | chr11      | 5234369   | -         | 1          | 0          |
| No.15      | CCTGTGGGGCAAGGTGAACGNNG | CCTGTGGGGCAAGGTGAAtGTGG  | chr11      | 5249740   | -         | 1          | 0          |
| No.16      | CCTGTGGGGCAAGGTGAACGNNG | CCTGTGGGGCAAGGTGAAtGTGG  | chr11      | 5254664   | -         | 1          | 0          |
| No.17      | CCTGTGGGGCAAGGTGAACGNNG | CCTGTGGaGCAAGaTGAAAtGTGG | chr11      | 5269826   | -         | 3          | 0          |
| No.18      | CCTGTGGGGCAAGGTGAACGNNG | CCTGTtGGGgAAGGTGAACaGGG  | chr19      | 13139598  | -         | 3          | 0          |
|            |                         |                          |            |           |           |            |            |
| CD26 sgRNA | crRNA                   | DNA                      | Chromosome | Position  | Direction | Mismatches | Bulge Size |
| No.1       | CGTGGATGAAGTTGGTGGTGNGG | CGTGGaAaGAAGgTGGaGGTGGGG | chr8       | 138367823 | -         | 3          | 0          |
| No.2       | CGTGGATGAAGTTGGTGGTGNGG | CGTGGAgGAAGagGGTGGTGTGG  | chr5       | 3139007   | -         | 3          | 0          |
| No.3       | CGTGGATGAAGTTGGTGGTGNGG | CGTGGATGAAGaTGGgGGTGTGG  | chr7       | 158998085 | -         | 2          | 0          |
| No.4       | CGTGGATGAAGTTGGTGGTGNGG | CGTGGATGAAGaTGGgGGTGTGG  | chr7       | 158998187 | -         | 2          | 0          |
| No.5       | CGTGGATGAAGTTGGTGGTGNGG | CGTGGcTaAAGTgGGTGGTGGGG  | chr2       | 23572188  | -         | 3          | 0          |
| No.6       | CGTGGATGAAGTTGGTGGTGNGG | gGTGtATGAAGTTaGTGGTGAGG  | chr17      | 5703270   | +         | 3          | 0          |
| No.7       | CGTGGATGAAGTTGGTGGTGNGG | CaTGGAgGAAGTTGGTGGgGGGG  | chr17      | 73872265  | -         | 3          | 0          |

|                       |                         |                          |            |           |           |            |            |
|-----------------------|-------------------------|--------------------------|------------|-----------|-----------|------------|------------|
| No.8                  | CGTGGATGAAGTTGGTGGTGNGG | gGTGGgTGAgtTTGGTGGTGAGG  | chrX       | 55833355  | +         | 3          | 0          |
| No.9                  | CGTGGATGAAGTTGGTGGTGNGG | CGTGGATGAAGTTGGTGGTGAGG  | chr11      | 5226939   | -         | 0          | 0          |
| No.10                 | CGTGGATGAAGTTGGTGGTGNGG | CGTGGATGcAGTTGGTGGTGAGG  | chr11      | 5234351   | -         | 1          | 0          |
| No.11                 | CGTGGATGAAGTTGGTGGTGNGG | tGTGcATGAAGcTGGTGGTGTGG  | chr3       | 54294544  | +         | 3          | 0          |
| No.12                 | CGTGGATGAAGTTGGTGGTGNGG | CGTGGATGAAGaTGGTGaTtGGG  | chr3       | 143298210 | +         | 3          | 0          |
|                       |                         |                          |            |           |           |            |            |
| CD17/19/26 nick sgRNA | crRNA                   | DNA                      | Chromosome | Position  | Direction | Mismatches | Bulge Size |
| No.1                  | CTCAGGAGTCAGATGCACCANGG | CTCAGGAGTCAGcTGCAGgAAGG  | chr8       | 95219189  | +         | 3          | 0          |
| No.2                  | CTCAGGAGTCAGATGCACCANGG | CTCAGGAGgCtGAgGCACCAGGG  | chr8       | 115828378 | -         | 3          | 0          |
| No.3                  | CTCAGGAGTCAGATGCACCANGG | gTCAGGAGTCAGATGgtCCAGGG  | chr8       | 138888718 | +         | 3          | 0          |
| No.4                  | CTCAGGAGTCAGATGCACCANGG | CTCtGGAGTCAGAAcGCACcTGGG | chr15      | 60100014  | +         | 3          | 0          |
| No.5                  | CTCAGGAGTCAGATGCACCANGG | CTCAGGAGTCAGATtgcCCAAGG  | chr15      | 83651008  | +         | 3          | 0          |
| No.6                  | CTCAGGAGTCAGATGCACCANGG | aTCAGGAGgCAGATGCAaCAGGG  | chr15      | 91259465  | +         | 3          | 0          |
| No.7                  | CTCAGGAGTCAGATGCACCANGG | CTCAGGtGaCAGgTGCACCAAGG  | chr5       | 159457784 | +         | 3          | 0          |
| No.8                  | CTCAGGAGTCAGATGCACCANGG | CTCAtGAGTCAGgTGcTCCAGGG  | chr5       | 178388975 | +         | 3          | 0          |
| No.9                  | CTCAGGAGTCAGATGCACCANGG | CTCAGGAGTcTggGCACCAGGG   | chr20      | 61636724  | -         | 3          | 0          |
| No.10                 | CTCAGGAGTCAGATGCACCANGG | CTCtGGAGTCAGATGaACCAGGG  | chr1       | 11453145  | -         | 2          | 0          |
| No.11                 | CTCAGGAGTCAGATGCACCANGG | CTCtGGAGTCAGATGcTcCtGGG  | chr1       | 203447616 | +         | 3          | 0          |
| No.12                 | CTCAGGAGTCAGATGCACCANGG | CcCAGGAGTCAGATGaACcTGGG  | chr22      | 23132220  | -         | 3          | 0          |
| No.13                 | CTCAGGAGTCAGATGCACCANGG | CTCAGGAGTCAGAAAAcACCAGGG | chr22      | 35921102  | +         | 3          | 0          |
| No.14                 | CTCAGGAGTCAGATGCACCANGG | CaaAGGAGTCAGATGcTCCAAGG  | chr7       | 43280153  | +         | 3          | 0          |
| No.15                 | CTCAGGAGTCAGATGCACCANGG | CaCatGAGaCAGATGCACCAAGG  | chr7       | 46712803  | -         | 3          | 0          |
| No.16                 | CTCAGGAGTCAGATGCACCANGG | CTCAGGAGTCaATGCAGcTAgG   | chr7       | 50341887  | +         | 3          | 0          |
| No.17                 | CTCAGGAGTCAGATGCACCANGG | CTCAGGAGTcTATGcTgCAGGG   | chr2       | 40322597  | +         | 3          | 0          |
| No.18                 | CTCAGGAGTCAGATGCACCANGG | CTCAGGAcTCAGAAcGcAgCAGGG | chr2       | 111070024 | +         | 3          | 0          |
| No.19                 | CTCAGGAGTCAGATGCACCANGG | CTtTGGgGTCAGATGCACCAGGG  | chr4       | 38169177  | +         | 3          | 0          |
| No.20                 | CTCAGGAGTCAGATGCACCANGG | CTCtGGAGTCAGATcCACcTAGG  | chr17      | 35779656  | +         | 3          | 0          |
| No.21                 | CTCAGGAGTCAGATGCACCANGG | CTCAGGAtgCAGAgGCACCAAGG  | chr17      | 80695784  | +         | 3          | 0          |
| No.22                 | CTCAGGAGTCAGATGCACCANGG | CTCgGGAcTCgGATGCACCAGGG  | chr17      | 80967791  | +         | 3          | 0          |
| No.23                 | CTCAGGAGTCAGATGCACCANGG | CTCAGGAGTCAGATGgACatGGG  | chr16      | 8647937   | -         | 3          | 0          |
| No.24                 | CTCAGGAGTCAGATGCACCANGG | CTtTGGAGTCAGATGCACcTGGG  | chr9       | 78475740  | -         | 3          | 0          |
| No.25                 | CTCAGGAGTCAGATGCACCANGG | CTCAGGAGTCAGAcACAcTAAAGG | chr9       | 85142374  | +         | 3          | 0          |
| No.26                 | CTCAGGAGTCAGATGCACCANGG | CTCtGGAGTCAGATGgACcTGGG  | chr9       | 130438223 | -         | 3          | 0          |
| No.27                 | CTCAGGAGTCAGATGCACCANGG | CTCAGGAGTcTATGaACcCAGG   | chr14      | 38987580  | +         | 3          | 0          |
| No.28                 | CTCAGGAGTCAGATGCACCANGG | CTCtGGAGTCAGAAcGcCCAGGG  | chr6       | 46243965  | +         | 3          | 0          |

|                 |                         |                         |            |           |           |            |            |
|-----------------|-------------------------|-------------------------|------------|-----------|-----------|------------|------------|
| No.29           | CTCAGGAGTCAGATGCACCANGG | CTCAGGAGTCAGATGCACCATGG | chr11      | 5234412   | +         | 0          | 0          |
| No.30           | CTCAGGAGTCAGATGCACCANGG | CTCAGGAGTCAGATGCACCATGG | chr11      | 5227000   | +         | 0          | 0          |
| No.31           | CTCAGGAGTCAGATGCACCANGG | CTCAGGAGTCAGgTcCACctCGG | chr11      | 61741228  | -         | 3          | 0          |
| No.32           | CTCAGGAGTCAGATGCACCANGG | CTCAGGgGTcTgATGCAtCAAGG | chr11      | 62603874  | -         | 3          | 0          |
| No.33           | CTCAGGAGTCAGATGCACCANGG | CTCAGGAGTCAGATaCAggAGGG | chr11      | 64237838  | +         | 3          | 0          |
| No.34           | CTCAGGAGTCAGATGCACCANGG | gTCAGaAGTCAGATGCcCCAGGG | chr10      | 131320294 | -         | 3          | 0          |
| No.35           | CTCAGGAGTCAGATGCACCANGG | CcCAGGAGTCAGATGCACatAGG | chr3       | 194596760 | -         | 3          | 0          |
|                 |                         |                         |            |           |           |            |            |
| IVS-I-1/5 sgRNA | crRNA                   | DNA                     | Chromosome | Position  | Direction | Mismatches | Bulge Size |
| No.1            | TGGTGAGGCCCTGGGCAGGTNNG | TGGaGAGGCCCTGGGgAGGgTGG | chr8       | 21265273  | -         | 3          | 0          |
| No.2            | TGGTGAGGCCCTGGGCAGGTNNG | TtGTGAtGCCCTGGtCAGGTGGG | chr8       | 104322609 | +         | 3          | 0          |
| No.3            | TGGTGAGGCCCTGGGCAGGTNNG | gGGcGAGGCCgTGGGCAGGTGGG | chr15      | 33311113  | +         | 3          | 0          |
| No.4            | TGGTGAGGCCCTGGGCAGGTNNG | TcGTaAaGCCCTGGGCAGGTGGG | chr5       | 1341983   | -         | 3          | 0          |
| No.5            | TGGTGAGGCCCTGGGCAGGTNNG | TGGTGAGGCatTGaGCAGGTAGG | chr5       | 54449162  | -         | 3          | 0          |
| No.6            | TGGTGAGGCCCTGGGCAGGTNNG | gGGTGAGaCCaTGGGCAGGTGGG | chr5       | 134142881 | +         | 3          | 0          |
| No.7            | TGGTGAGGCCCTGGGCAGGTNNG | TGGTGAGGCCCTGGGgtGGgTGG | chr5       | 140240613 | +         | 3          | 0          |
| No.8            | TGGTGAGGCCCTGGGCAGGTNNG | TGGTGAGGggCTGGGCAGGgAGG | chr1       | 17554232  | +         | 3          | 0          |
| No.9            | TGGTGAGGCCCTGGGCAGGTNNG | TGGTGAGGCCCaGGGagGGTGGG | chr1       | 27380510  | -         | 3          | 0          |
| No.10           | TGGTGAGGCCCTGGGCAGGTNNG | gGccGAGGCCCTGGGCAGGTGGG | chr1       | 54281370  | -         | 3          | 0          |
| No.11           | TGGTGAGGCCCTGGGCAGGTNNG | TacTGAGGCCCTGGGCAGGaTGG | chr1       | 116150564 | -         | 3          | 0          |
| No.12           | TGGTGAGGCCCTGGGCAGGTNNG | gGGTGAGGCCCTGGGgAGGcAGG | chr1       | 160371650 | +         | 3          | 0          |
| No.13           | TGGTGAGGCCCTGGGCAGGTNNG | gGGTGAGaCCCTGGGCAGGgAGG | chr22      | 22599219  | -         | 3          | 0          |
| No.14           | TGGTGAGGCCCTGGGCAGGTNNG | TGGgGAGGtCaTGGGCAGGTGGG | chr22      | 23153370  | -         | 3          | 0          |
| No.15           | TGGTGAGGCCCTGGGCAGGTNNG | TGaTGgGGCCCTGGGCAGGTAGG | chr7       | 44266688  | -         | 2          | 0          |
| No.16           | TGGTGAGGCCCTGGGCAGGTNNG | aGaTGAGGCCCTGGGCAGGaAGG | chr7       | 127590052 | -         | 3          | 0          |
| No.17           | TGGTGAGGCCCTGGGCAGGTNNG | TGGTGAtGCCCaGGGctGGTGGG | chr2       | 7383148   | +         | 3          | 0          |
| No.18           | TGGTGAGGCCCTGGGCAGGTNNG | TGcTgTGGCCCTGGGctGGTCGG | chr2       | 218383021 | -         | 3          | 0          |
| No.19           | TGGTGAGGCCCTGGGCAGGTNNG | TGGTaAGaCCCTGGGCAGGcGGG | chr2       | 237911485 | -         | 3          | 0          |
| No.20           | TGGTGAGGCCCTGGGCAGGTNNG | TGGTGAGGCCgTGGGCAGGgAGG | chr2       | 239729702 | +         | 2          | 0          |
| No.21           | TGGTGAGGCCCTGGGCAGGTNNG | TGGgGAGGCaCTGGGtAGGTGGG | chr12      | 112163302 | -         | 3          | 0          |
| No.22           | TGGTGAGGCCCTGGGCAGGTNNG | TGGgGAGGCCgTGGGCAGGaCGG | chr12      | 130435569 | -         | 3          | 0          |
| No.23           | TGGTGAGGCCCTGGGCAGGTNNG | TGGTGgtGCCCaGGGCAGGTGGG | chr12      | 132609259 | +         | 3          | 0          |
| No.24           | TGGTGAGGCCCTGGGCAGGTNNG | TGGTGAGGggCTGGGCAtGTTGG | chr4       | 72373608  | +         | 3          | 0          |
| No.25           | TGGTGAGGCCCTGGGCAGGTNNG | TGGTGAGGCCCTGGGggGcTTGG | chr17      | 39673492  | -         | 3          | 0          |
| No.26           | TGGTGAGGCCCTGGGCAGGTNNG | aGGTGgGGCCCTGaGCAGGTTGG | chr17      | 79125192  | +         | 3          | 0          |

|                      |                         |                         |            |           |           |            |            |
|----------------------|-------------------------|-------------------------|------------|-----------|-----------|------------|------------|
| No.27                | TGGTGAGGCCCTGGGCAGGTNGG | TGGTGAAgCaCTGGGCgGGTGGG | chr16      | 14789621  | +         | 3          | 0          |
| No.28                | TGGTGAGGCCCTGGGCAGGTNGG | TGGTGAAgCaCTGGGCgGGTGGG | chr16      | 15339276  | -         | 3          | 0          |
| No.29                | TGGTGAGGCCCTGGGCAGGTNGG | TGGTGAAgCaCTGGGCgGGTGGG | chr16      | 16417211  | +         | 3          | 0          |
| No.30                | TGGTGAGGCCCTGGGCAGGTNGG | TGGTGAAgCaCTGGGCgGGTGGG | chr16      | 18294645  | -         | 3          | 0          |
| No.31                | TGGTGAGGCCCTGGGCAGGTNGG | gGGTGgGGCCCTGGGCAGGaTGG | chr16      | 50386362  | +         | 3          | 0          |
| No.32                | TGGTGAGGCCCTGGGCAGGTNGG | gGGTGAGGCCcGGcCAGGTGGG  | chrX       | 7922227   | -         | 3          | 0          |
| No.33                | TGGTGAGGCCCTGGGCAGGTNGG | TGGTGAGGCCCaGcGaAGGTAGG | chr14      | 20969464  | -         | 3          | 0          |
| No.34                | TGGTGAGGCCCTGGGCAGGTNGG | TGGTGAGGgCCTctGCAGGTGGG | chr14      | 93040421  | -         | 3          | 0          |
| No.35                | TGGTGAGGCCCTGGGCAGGTNGG | ccGTGAGGCCCTGGGaAGGTGGG | chr14      | 95504641  | -         | 3          | 0          |
| No.36                | TGGTGAGGCCCTGGGCAGGTNGG | aGcTGAGGgCCTGGGCAGGTGGG | chr14      | 104786985 | +         | 3          | 0          |
| No.37                | TGGTGAGGCCCTGGGCAGGTNGG | TGGTGAGGCctTGGGCAtGgAGG | chr6       | 34021671  | -         | 3          | 0          |
| No.38                | TGGTGAGGCCCTGGGCAGGTNGG | TGGTGAGGCCCTGGGCAGGTTGG | chr11      | 5226924   | -         | 0          | 0          |
| No.39                | TGGTGAGGCCCTGGGCAGGTNGG | TGGTGAGGCCCTGGGCAGGTTGG | chr11      | 5234336   | -         | 0          | 0          |
| No.40                | TGGTGAGGCCCTGGGCAGGTNGG | TtGTgGGCCCTGGGcTGGTTGG  | chr11      | 12206236  | +         | 3          | 0          |
| No.41                | TGGTGAGGCCCTGGGCAGGTNGG | TGGTGAGGagCTGGGcTGGTGGG | chr11      | 64258418  | +         | 3          | 0          |
| No.42                | TGGTGAGGCCCTGGGCAGGTNGG | TGGTGgGGCCCaGGGCAGaTGGG | chr11      | 71444248  | -         | 3          | 0          |
| No.43                | TGGTGAGGCCCTGGGCAGGTNGG | gGGTGAGGCCcGGGCAGcTGGG  | chr11      | 72703304  | -         | 3          | 0          |
| No.44                | TGGTGAGGCCCTGGGCAGGTNGG | TtGgGAGGCCcGGGCAGGTGGG  | chr10      | 15951550  | -         | 3          | 0          |
| No.45                | TGGTGAGGCCCTGGGCAGGTNGG | TGGTGgGGCaCTtGGCAGGTGGG | chr10      | 128457509 | +         | 3          | 0          |
| No.46                | TGGTGAGGCCCTGGGCAGGTNGG | TGGTtAGGCaaTGGGCAGGTGGG | chr13      | 18739234  | -         | 3          | 0          |
| No.47                | TGGTGAGGCCCTGGGCAGGTNGG | aGGTGAGGgCCTGGcCAGGTGGG | chr13      | 112697058 | +         | 3          | 0          |
| No.48                | TGGTGAGGCCCTGGGCAGGTNGG | TGGTtAGGCaaTGGGCAGGTGGG | chr18      | 14341366  | +         | 3          | 0          |
| No.49                | TGGTGAGGCCCTGGGCAGGTNGG | TGGaGAGGCCCTGGGCAGGTGGG | chr18      | 78939382  | -         | 1          | 0          |
| No.50                | TGGTGAGGCCCTGGGCAGGTNGG | TGGaGAGGCCCTGGGgAGGaAGG | chr3       | 44424917  | -         | 3          | 0          |
| No.51                | TGGTGAGGCCCTGGGCAGGTNGG | TGGTcAGGCCCTGGGCAGGgAGG | chr3       | 140530825 | -         | 2          | 0          |
|                      |                         |                         |            |           |           |            |            |
| IVS-I-1/5 nick sgRNA | crRNA                   | DNA                     | Chromosome | Position  | Direction | Mismatches | Bulge Size |
| No.1                 | TCCACATGCCCAGTTTCTATNGG | TtCACATGCCCAGTTTCTtTTGG | chr5       | 78762393  | -         | 2          | 0          |
| No.2                 | TCCACATGCCCAGTTTCTATNGG | TCCACATGCaCAGTgTtATTGG  | chr14      | 27980926  | +         | 3          | 0          |
| No.3                 | TCCACATGCCCAGTTTCTATNGG | TCCACcaGCCCAGcTTCTATGGG | chr6       | 43444870  | +         | 3          | 0          |
| No.4                 | TCCACATGCCCAGTTTCTATNGG | TCCACATGtCCtGTTtTATTGG  | chr6       | 121990498 | +         | 3          | 0          |
| No.5                 | TCCACATGCCCAGTTTCTATNGG | TCCACATGCCCAGTTTCTATTGG | chr11      | 5226871   | +         | 0          | 0          |
| No.6                 | TCCACATGCCCAGTTTCTATNGG | TCCAtATGCCcAGTTTtTaAGGG | chr11      | 46437205  | -         | 3          | 0          |
| No.7                 | TCCACATGCCCAGTTTCTATNGG | TCCAAATGCCcAGTTTctTAGG  | chr11      | 72071981  | -         | 3          | 0          |
| No.8                 | TCCACATGCCCAGTTTCTATNGG | TCCcCATtCCCAGTTTCTcTTGG | chr11      | 92851552  | -         | 3          | 0          |

|                 |                         |                         |            |           |           |            |            |
|-----------------|-------------------------|-------------------------|------------|-----------|-----------|------------|------------|
| CD39 sgRNA      | crRNA                   | DNA                     | Chromosome | Position  | Direction | Mismatches | Bulge Size |
| No.1            | TGGTCTACCCTTGGACCCAGNGG | gGGTCTACtCTTtGACCCAGGGG | chr1       | 151599093 | +         | 3          | 0          |
| No.2            | TGGTCTACCCTTGGACCCAGNGG | TaGcCTACCCTTtGACCCAGAGG | chr2       | 230951588 | +         | 3          | 0          |
| No.3            | TGGTCTACCCTTGGACCCAGNGG | TGGTCTACCtTTGGACCaAGTGG | chr16      | 22327981  | +         | 2          | 0          |
| No.4            | TGGTCTACCCTTGGACCCAGNGG | TtGTgaACCCTTGGACCCAGCGG | chr6       | 71620728  | +         | 3          | 0          |
| No.5            | TGGTCTACCCTTGGACCCAGNGG | TGGTCTACCCTTGGACCCAGAGG | chr11      | 5226768   | -         | 0          | 0          |
| No.6            | TGGTCTACCCTTGGACCCAGNGG | TGGTCTACCCTTGGACCCAGAGG | chr11      | 5234182   | -         | 0          | 0          |
| No.7            | TGGTCTACCCTTGGACCCAGNGG | TtGTCTACCCaTGGACCCAGAGG | chr11      | 5254483   | -         | 2          | 0          |
| No.8            | TGGTCTACCCTTGGACCCAGNGG | TtGTCTACCCaTGGACCTAGAGG | chr11      | 5243297   | -         | 3          | 0          |
| No.9            | TGGTCTACCCTTGGACCCAGNGG | TtGTCTACCCaTGGACCCAGAGG | chr11      | 5249559   | -         | 2          | 0          |
| No.10           | TGGTCTACCCTTGGACCCAGNGG | TccTCTcCCCTTGGACCCAGAGG | chr10      | 62668225  | -         | 3          | 0          |
| No.11           | TGGTCTACCCTTGGACCCAGNGG | TGGTCTAgCCTTGGcCCCAcTGG | chr19      | 7626436   | +         | 3          | 0          |
| No.12           | TGGTCTACCCTTGGACCCAGNGG | TGGgaTACCCTgGGACCCAGCGG | chr3       | 128934102 | -         | 3          | 0          |
|                 |                         |                         |            |           |           |            |            |
| CD39 nick sgRNA | crRNA                   | DNA                     | Chromosome | Position  | Direction | Mismatches | Bulge Size |
| No.1            | GGGTGGGAAAATAGACCAATNGG | GGGTGGGAAAATAGACaAAaTGG | chr15      | 70203642  | +         | 2          | 0          |
| No.2            | GGGTGGGAAAATAGACCAATNGG | GGtaGGGAAAaAGACCAATAGG  | chr5       | 103629305 | -         | 3          | 0          |
| No.3            | GGGTGGGAAAATAGACCAATNGG | taGTGgaAAAATAGACCAATGGG | chr1       | 81273103  | +         | 3          | 0          |
| No.4            | GGGTGGGAAAATAGACCAATNGG | GGcTGGGAAAATtGACCAgTGGG | chr1       | 111509291 | -         | 3          | 0          |
| No.5            | GGGTGGGAAAATAGACCAATNGG | GaGTGGGAAAATAGctCAATTGG | chr1       | 236068972 | +         | 3          | 0          |
| No.6            | GGGTGGGAAAATAGACCAATNGG | GGcTGGGgAAAgAGACCAATGGG | chr4       | 166435189 | -         | 3          | 0          |
| No.7            | GGGTGGGAAAATAGACCAATNGG | GGGTGGGcggATAGACCAATGGG | chr16      | 5347776   | -         | 3          | 0          |
| No.8            | GGGTGGGAAAATAGACCAATNGG | GGGTGGGAAAATgGAgAATAGG  | chr16      | 62752897  | -         | 3          | 0          |
| No.9            | GGGTGGGAAAATAGACCAATNGG | GGGTGGGgAAATAGACaAAaTGG | chr6       | 83469734  | -         | 3          | 0          |
| No.10           | GGGTGGGAAAATAGACCAATNGG | GGGTGGGAAAATAGACCAATAGG | chr11      | 5226803   | +         | 0          | 0          |
| No.11           | GGGTGGGAAAATAGACCAATNGG | aGaTGGGAAAATAGACtAATGGG | chr13      | 78330130  | -         | 3          | 0          |
| No.12           | GGGTGGGAAAATAGACCAATNGG | GGGTGaGAAAATaAaCAATGGG  | chr19      | 5066561   | -         | 3          | 0          |
| No.13           | GGGTGGGAAAATAGACCAATNGG | GaGTGGGAAAaAGACCAgTAGG  | chr19      | 36012984  | +         | 3          | 0          |
| No.14           | GGGTGGGAAAATAGACCAATNGG | GGGTGGGAAGAcAGACaAATAGG | chr3       | 49907322  | -         | 3          | 0          |
|                 |                         |                         |            |           |           |            |            |
| CD71/72 sgRNA   | crRNA                   | DNA                     | Chromosome | Position  | Direction | Mismatches | Bulge Size |
| No.1            | GTGAGCCAGGCCATCACTAANGG | aTGAGCCAGGCCAgCACTgAGGG | chr8       | 133274926 | -         | 3          | 0          |
| No.2            | GTGAGCCAGGCCATCACTAANGG | GTGAGCCAGGCaAaCACTcAGGG | chr20      | 57134922  | +         | 3          | 0          |
| No.3            | GTGAGCCAGGCCATCACTAANGG | GTGAGCCcGGCCAcCACTAgTGG | chr20      | 58391812  | +         | 3          | 0          |

|                    |                         |                         |            |           |           |            |            |
|--------------------|-------------------------|-------------------------|------------|-----------|-----------|------------|------------|
| No.4               | GTGAGCCAGGCCATCACTAANGG | GTGtGCCAGGCCcTCACTtAGGG | chr22      | 45990543  | -         | 3          | 0          |
| No.5               | GTGAGCCAGGCCATCACTAANGG | GgGAGCCAGGCCAgCACTAtGGG | chr7       | 143063673 | -         | 3          | 0          |
| No.6               | GTGAGCCAGGCCATCACTAANGG | GaGAGgCAGGCCATCAgTAAAGG | chr2       | 217882216 | -         | 3          | 0          |
| No.7               | GTGAGCCAGGCCATCACTAANGG | aTGAGCCAGGCaAaCACTAATGG | chr17      | 51903484  | +         | 3          | 0          |
| No.8               | GTGAGCCAGGCCATCACTAANGG | GTGAGCCaAGCCcTgACTAAAGG | chrX       | 10241084  | -         | 3          | 0          |
| No.9               | GTGAGCCAGGCCATCACTAANGG | GTGAGCCAGGCCAgCACTttGGG | chr6       | 41959422  | +         | 3          | 0          |
| No.10              | GTGAGCCAGGCCATCACTAANGG | tTaAGCCAGaCCATCACTAAGGG | chr6       | 123645765 | -         | 3          | 0          |
| No.11              | GTGAGCCAGGCCATCACTAANGG | GTGAGCCAGGCCATCACTAAAGG | chr11      | 5226657   | +         | 0          | 0          |
| No.12              | GTGAGCCAGGCCATCACTAANGG | GTGAGCCAGGCCATCACTAAAGG | chr11      | 5234071   | +         | 0          | 0          |
| No.13              | GTGAGCCAGGCCATCACTAANGG | GTcAGCCAGGCCATgACTtACGG | chr11      | 72589153  | +         | 3          | 0          |
| No.14              | GTGAGCCAGGCCATCACTAANGG | GTGAGctgGGCCAgCACTAAAGG | chr3       | 49418947  | -         | 3          | 0          |
|                    |                         |                         |            |           |           |            |            |
| CD71/72 nick sgRNA | crRNA                   | DNA                     | Chromosome | Position  | Direction | Mismatches | Bulge Size |
| No.1               | GGCTCACCTGGACAACCTCANGG | aGCTCACCTGGACAcCCTCcTGG | chr15      | 101307606 | +         | 3          | 0          |
| No.2               | GGCTCACCTGGACAACCTCANGG | GGggCACCaGGACAACCTCAGGG | chr1       | 1495368   | -         | 3          | 0          |
| No.3               | GGCTCACCTGGACAACCTCANGG | GGCTCACCTGGACAgaCTgAAGG | chr1       | 117588988 | +         | 3          | 0          |
| No.4               | GGCTCACCTGGACAACCTCANGG | GGCTCACaTGGAtAACgTCAGGG | chr1       | 209064179 | +         | 3          | 0          |
| No.5               | GGCTCACCTGGACAACCTCANGG | GGCTgAtCTGGACcACCTCAGGG | chr2       | 113309624 | +         | 3          | 0          |
| No.6               | GGCTCACCTGGACAACCTCANGG | GGCTtcCCTGGgCAACCTCATGG | chr12      | 109267889 | -         | 3          | 0          |
| No.7               | GGCTCACCTGGACAACCTCANGG | GtCTCACCTGGgCAcCCTCAGGG | chr12      | 114007671 | -         | 3          | 0          |
| No.8               | GGCTCACCTGGACAACCTCANGG | GGCTCACCTtGACcACCcCAAGG | chr4       | 10613277  | -         | 3          | 0          |
| No.9               | GGCTCACCTGGACAACCTCANGG | GGCTCACCTGGACAACCTCAAGG | chr11      | 5226641   | -         | 0          | 0          |
| No.10              | GGCTCACCTGGACAACCTCANGG | GGCTCACCTGGACAACCTCAAGG | chr11      | 5234055   | -         | 0          | 0          |
| No.11              | GGCTCACCTGGACAACCTCANGG | GGCTgACCcGGACAACCTCcAGG | chr11      | 77123740  | +         | 3          | 0          |
| No.12              | GGCTCACCTGGACAACCTCANGG | aGCTCACCTGaACAACCaCAGGG | chr11      | 96554748  | -         | 3          | 0          |
|                    |                         |                         |            |           |           |            |            |
| IVS-II-1 sgRNA     | crRNA                   | DNA                     | Chromosome | Position  | Direction | Mismatches | Bulge Size |
| No.1               | CGTGGATCCTGAGAACTTCANGG | aGTGGgTCCTGAGAACTaCAAGG | chr1       | 160549792 | +         | 3          | 0          |
| No.2               | CGTGGATCCTGAGAACTTCANGG | CGTGGATgCTGgGAgCTTCAGGG | chr2       | 55112633  | -         | 3          | 0          |
| No.3               | CGTGGATCCTGAGAACTTCANGG | CcTGGATtCTGAGAAaTTCAAGG | chr16      | 60504053  | -         | 3          | 0          |
| No.4               | CGTGGATCCTGAGAACTTCANGG | CGTGGATCCTGAGAACTTCAGGG | chr11      | 5233989   | -         | 0          | 0          |
| No.5               | CGTGGATCCTGAGAACTTCANGG | CGTGGATCCTGAGAACTTCAGGG | chr11      | 5226575   | -         | 0          | 0          |
| No.6               | CGTGGATCCTGAGAACTTCANGG | CGTGGAcCCTGAGAACTTCcTGG | chr11      | 5243104   | -         | 2          | 0          |
| No.7               | CGTGGATCCTGAGAACTTCANGG | tGTGGATCCTGAGAACTTCAAGG | chr11      | 5249366   | -         | 1          | 0          |
| No.8               | CGTGGATCCTGAGAACTTCANGG | tGTGGATCCTGAGAACTTCAAGG | chr11      | 5254290   | -         | 1          | 0          |

|                     |                         |                         |            |           |           |            |            |
|---------------------|-------------------------|-------------------------|------------|-----------|-----------|------------|------------|
| No.9                | CGTGGATCCTGAGAACTTCANGG | tGTGGATCCTGAGAACTTCAAGG | chr11      | 5269452   | -         | 1          | 0          |
| No.10               | CGTGGATCCTGAGAACTTCANGG | CGTGGAcCCTGAGAAcTCcGGG  | chr10      | 131260342 | -         | 3          | 0          |
| No.11               | CGTGGATCCTGAGAACTTCANGG | CtTaGATCCTGtGAACCTCAGGG | chr13      | 89389953  | -         | 3          | 0          |
| No.12               | CGTGGATCCTGAGAACTTCANGG | CcTGGATtCTGAGAgCTTCATGG | chr3       | 184461650 | +         | 3          | 0          |
|                     |                         |                         |            |           |           |            |            |
| IVS-II-1 nick sgRNA | crRNA                   | DNA                     | Chromosome | Position  | Direction | Mismatches | Bulge Size |
| No.1                | GAACTTAACCATAGAAAAGANGG | tAACTTAACCAaAGAAgAGAAGG | chr8       | 43176754  | -         | 3          | 0          |
| No.2                | GAACTTAACCATAGAAAAGANGG | aAACTTAACCAaAGAAAtGAAGG | chr8       | 57315512  | +         | 3          | 0          |
| No.3                | GAACTTAACCATAGAAAAGANGG | GAACTTAAGCAaAGAAAAaATGG | chr5       | 15284601  | +         | 3          | 0          |
| No.4                | GAACTTAACCATAGAAAAGANGG | GAACTTtACCATAGgAAAtATGG | chr5       | 29833980  | -         | 3          | 0          |
| No.5                | GAACTTAACCATAGAAAAGANGG | GAACTTAtCCAgAGAgAAGATGG | chr5       | 78725417  | -         | 3          | 0          |
| No.6                | GAACTTAACCATAGAAAAGANGG | GAACTgAAaCATaAAAAAGAAGG | chr5       | 112831752 | -         | 3          | 0          |
| No.7                | GAACTTAACCATAGAAAAGANGG | GcACTTAACCATtGAAAAaAGGG | chr1       | 52102805  | -         | 3          | 0          |
| No.8                | GAACTTAACCATAGAAAAGANGG | aAACTTAACCAcAGAAAAGtAGG | chr1       | 63976233  | +         | 3          | 0          |
| No.9                | GAACTTAACCATAGAAAAGANGG | GAAaTTAAtCAgAGAAAAGAAGG | chr1       | 181725049 | -         | 3          | 0          |
| No.10               | GAACTTAACCATAGAAAAGANGG | GAACTTtAaCAaAGAAAAGATGG | chr7       | 92435629  | +         | 3          | 0          |
| No.11               | GAACTTAACCATAGAAAAGANGG | GAACTTAACCAaAGAAgtGAAGG | chr7       | 113023050 | -         | 3          | 0          |
| No.12               | GAACTTAACCATAGAAAAGANGG | aAACTTAACCAaAGAAAtGAAGG | chr12      | 82208926  | -         | 3          | 0          |
| No.13               | GAACTTAACCATAGAAAAGANGG | cAACTTAACCAaAGAAAtGAAGG | chr21      | 16875888  | +         | 3          | 0          |
| No.14               | GAACTTAACCATAGAAAAGANGG | GAACTTAAaCATAGAcAAaATGG | chrX       | 51571348  | +         | 3          | 0          |
| No.15               | GAACTTAACCATAGAAAAGANGG | GAaTTAACCATAGAAAAGAAGG  | chrX       | 119807445 | -         | 2          | 0          |
| No.16               | GAACTTAACCATAGAAAAGANGG | GAACTgAACCAgAaAAAAGAAGG | chr6       | 152330468 | -         | 3          | 0          |
| No.17               | GAACTTAACCATAGAAAAGANGG | GAACTTAACCATAGAAAAGAAGG | chr11      | 5226520   | +         | 0          | 0          |
| No.18               | GAACTTAACCATAGAAAAGANGG | GAACTTAACCATAtAAAAcATGG | chr11      | 88694985  | +         | 2          | 0          |
| No.19               | GAACTTAACCATAGAAAAGANGG | GAgaTTAAaCATAGAAAAGAAGG | chr13      | 27611955  | +         | 3          | 0          |
| No.20               | GAACTTAACCATAGAAAAGANGG | tAtCTTAACCATAGAAAAtAAGG | chr13      | 72547367  | -         | 3          | 0          |
| No.21               | GAACTTAACCATAGAAAAGANGG | GAACTTAtgCATgGAAAAGAAGG | chr18      | 30095766  | -         | 3          | 0          |
| No.22               | GAACTTAACCATAGAAAAGANGG | GAAaTTAACCAaAGAAAAGAAGG | chr3       | 19205713  | +         | 2          | 0          |
| No.23               | GAACTTAACCATAGAAAAGANGG | GAACTTAACCATcaAAAtGATGG | chr3       | 128714714 | +         | 3          | 0          |
|                     |                         |                         |            |           |           |            |            |
| IVS-II-745 sgRNA    | crRNA                   | DNA                     | Chromosome | Position  | Direction | Mismatches | Bulge Size |
| No.1                | AATAAAAGCAGAATGGTAGCNGG | AATAAAAGaAGAATGGTAtaAGG | chr8       | 77912456  | +         | 3          | 0          |
| No.2                | AATAAAAGCAGAATGGTAGCNGG | AATAAAaCAGAAaGGgAGCAGG  | chr5       | 67092869  | -         | 3          | 0          |
| No.3                | AATAAAAGCAGAATGGTAGCNGG | AATAAAAGaAtAAaGGTAGCAGG | chr5       | 86227158  | +         | 3          | 0          |
| No.4                | AATAAAAGCAGAATGGTAGCNGG | AATAAAAGCAGAgTgTgGCAGG  | chr5       | 89710870  | -         | 3          | 0          |

|                       |                         |                          |            |           |           |            |            |
|-----------------------|-------------------------|--------------------------|------------|-----------|-----------|------------|------------|
| No.5                  | AATAAAAGCAGAATGGTAGCNNG | AAgAAgAGaAGAATGGTAGCTGG  | chr5       | 131919788 | +         | 3          | 0          |
| No.6                  | AATAAAAGCAGAATGGTAGCNNG | AATAAAAGCAGcATGtTAGtAGG  | chr20      | 9177194   | +         | 3          | 0          |
| No.7                  | AATAAAAGCAGAATGGTAGCNNG | AATAAAAGCAaAATGtaAGCTGG  | chr20      | 33517937  | -         | 3          | 0          |
| No.8                  | AATAAAAGCAGAATGGTAGCNNG | AATAAAAGCccAATGGcAGCTGG  | chr20      | 62003655  | +         | 3          | 0          |
| No.9                  | AATAAAAGCAGAATGGTAGCNNG | AATAAAAtCAttATGGTAGCAGG  | chr1       | 7181517   | +         | 3          | 0          |
| No.10                 | AATAAAAGCAGAATGGTAGCNNG | AATAAAAGCAGggTGGaAGCAGG  | chr1       | 19081596  | +         | 3          | 0          |
| No.11                 | AATAAAAGCAGAATGGTAGCNNG | AATAAAAGCAGcTGGaAGCAGG   | chr1       | 23823211  | -         | 3          | 0          |
| No.12                 | AATAAAAGCAGAATGGTAGCNNG | cAaAAAAGCAGAAaGGTAGCTGG  | chr1       | 75223230  | -         | 3          | 0          |
| No.13                 | AATAAAAGCAGAATGGTAGCNNG | AATAAAAGCAGAATGGgAaaAGG  | chr2       | 53812385  | +         | 3          | 0          |
| No.14                 | AATAAAAGCAGAATGGTAGCNNG | AATAAAaCAGAAaGGcAGCCGG   | chr2       | 98742296  | +         | 3          | 0          |
| No.15                 | AATAAAAGCAGAATGGTAGCNNG | gAgAcAAGCAGAATGGTAGCTGG  | chr2       | 206870719 | -         | 3          | 0          |
| No.16                 | AATAAAAGCAGAATGGTAGCNNG | AAgcAgAGCAGAATGGTAGCTGG  | chr2       | 214478877 | -         | 3          | 0          |
| No.17                 | AATAAAAGCAGAATGGTAGCNNG | cATAAAAGCAGAgTGGTAaCAGG  | chr2       | 231368509 | +         | 3          | 0          |
| No.18                 | AATAAAAGCAGAATGGTAGCNNG | AATAAAAGCAGAgTGGaAGCAGG  | chr12      | 70791050  | -         | 2          | 0          |
| No.19                 | AATAAAAGCAGAATGGTAGCNNG | AAgAAAAGCAGAATGccAGCCGG  | chr12      | 130367703 | +         | 3          | 0          |
| No.20                 | AATAAAAGCAGAATGGTAGCNNG | AAgAAAAGCAGAATaGTaACTGG  | chr21      | 33999273  | -         | 3          | 0          |
| No.21                 | AATAAAAGCAGAATGGTAGCNNG | AATAAAAGCAtAATGGgAGCAGG  | chr4       | 103812767 | -         | 3          | 0          |
| No.22                 | AATAAAAGCAGAATGGTAGCNNG | AATAAAAGCAGaGgAGCGGG     | chr17      | 82685180  | +         | 3          | 0          |
| No.23                 | AATAAAAGCAGAATGGTAGCNNG | AATAAAAtGCACaAaGGTAGCTGG | chr16      | 2881807   | +         | 3          | 0          |
| No.24                 | AATAAAAGCAGAATGGTAGCNNG | AATAAAAGCAcAATGcTAGCAGG  | chr16      | 55387816  | +         | 2          | 0          |
| No.25                 | AATAAAAGCAGAATGGTAGCNNG | AATAAtAagAGAATGGTAGCAGG  | chr9       | 25597846  | +         | 3          | 0          |
| No.26                 | AATAAAAGCAGAATGGTAGCNNG | AAcAAAAGCAagATGGTAGCAGG  | chr9       | 73659555  | +         | 3          | 0          |
| No.27                 | AATAAAAGCAGAATGGTAGCNNG | AATAAAgGCAGAATGGcAtCGGG  | chr9       | 87202244  | +         | 3          | 0          |
| No.28                 | AATAAAAGCAGAATGGTAGCNNG | AATAAAgGCAtAATGGgAGCTGG  | chr9       | 88810679  | -         | 3          | 0          |
| No.29                 | AATAAAAGCAGAATGGTAGCNNG | AATtAAAGCAaAATGGTAGgTGG  | chrX       | 44807078  | -         | 3          | 0          |
| No.30                 | AATAAAAGCAGAATGGTAGCNNG | AAgAAAAGCAGAAgGGTAGaAGG  | chrX       | 98773192  | +         | 3          | 0          |
| No.31                 | AATAAAAGCAGAATGGTAGCNNG | AATAAAAGgAGAATGGgAGgAGG  | chr14      | 40097881  | -         | 3          | 0          |
| No.32                 | AATAAAAGCAGAATGGTAGCNNG | AATcAcAGCAGAATGGaAGCTGG  | chr14      | 63048893  | +         | 3          | 0          |
| No.33                 | AATAAAAGCAGAATGGTAGCNNG | AATAAAAtCAatATGGTAGCAGG  | chr6       | 46564971  | +         | 3          | 0          |
| No.34                 | AATAAAAGCAGAATGGTAGCNNG | AATAAAAGCAGAATGGTAGCTGG  | chr11      | 5225813   | +         | 0          | 0          |
| No.35                 | AATAAAAGCAGAATGGTAGCNNG | AAcAAAAGCAGaGgTAGCTGG    | chr13      | 39402731  | +         | 3          | 0          |
| No.36                 | AATAAAAGCAGAATGGTAGCNNG | AATAAAAGCAGgtTGGTAGtGGG  | chr13      | 42147206  | +         | 3          | 0          |
| No.37                 | AATAAAAGCAGAATGGTAGCNNG | AATAAAAGCAGAAgGGgAGtTGG  | chr18      | 42175211  | +         | 3          | 0          |
|                       |                         |                          |            |           |           |            |            |
| IVS-II-745 nick sgRNA | crRNA                   | DNA                      | Chromosome | Position  | Direction | Mismatches | Bulge Size |

|       |                        |                         |       |           |   |   |   |
|-------|------------------------|-------------------------|-------|-----------|---|---|---|
| No.1  | TAAATTGTAAGTATGTAAGNGG | TAAATTGTAcCTcATtTAAGAGG | chr8  | 112833641 | + | 3 | 0 |
| No.2  | TAAATTGTAAGTATGTAAGNGG | TAAATTGctACTGATGTAtGGGG | chr8  | 139515013 | + | 3 | 0 |
| No.3  | TAAATTGTAAGTATGTAAGNGG | TAAATTaTAAaTcATGTAAGAGG | chr5  | 11348797  | + | 3 | 0 |
| No.4  | TAAATTGTAAGTATGTAAGNGG | TAAATgGTAtCTGgTGTAAGTGG | chr1  | 92065250  | - | 3 | 0 |
| No.5  | TAAATTGTAAGTATGTAAGNGG | TAAATTtTAAtTGAgGTAAGTGG | chr7  | 130561278 | + | 3 | 0 |
| No.6  | TAAATTGTAAGTATGTAAGNGG | TAAATTtTAAaTGATGaAAGTGG | chr2  | 41446312  | + | 3 | 0 |
| No.7  | TAAATTGTAAGTATGTAAGNGG | TAtATTGaAACTGgTGTAAGTGG | chr2  | 76075652  | + | 3 | 0 |
| No.8  | TAAATTGTAAGTATGTAAGNGG | TAttTaGTAAGTATGTAAGTGG  | chr2  | 164693037 | + | 3 | 0 |
| No.9  | TAAATTGTAAGTATGTAAGNGG | TtAATTGTAAgTcATGTAAGTGG | chr2  | 187979210 | + | 3 | 0 |
| No.10 | TAAATTGTAAGTATGTAAGNGG | TAAAgTGTAAGTcATGTAcGTGG | chr12 | 44707623  | + | 3 | 0 |
| No.11 | TAAATTGTAAGTATGTAAGNGG | TAAATTtTAACTGATGTctGTGG | chr4  | 116673927 | - | 3 | 0 |
| No.12 | TAAATTGTAAGTATGTAAGNGG | TAcATTGTAAgTGATaTAAGAGG | chr16 | 2417028   | + | 3 | 0 |
| No.13 | TAAATTGTAAGTATGTAAGNGG | gAAAaTGTAAGTGAaGTAAGAGG | chrX  | 31243942  | + | 3 | 0 |
| No.14 | TAAATTGTAAGTATGTAAGNGG | TAAATTGTtCTGATtTAAGAGG  | chrX  | 103239183 | + | 3 | 0 |
| No.15 | TAAATTGTAAGTATGTAAGNGG | TAAATTGTAAGTATGTAAGAGG  | chr11 | 5225863   | - | 0 | 0 |
| No.16 | TAAATTGTAAGTATGTAAGNGG | TgAATTGTAtCTcATGTAAGTGG | chr13 | 104671581 | + | 3 | 0 |
| No.17 | TAAATTGTAAGTATGTAAGNGG | TAAATacTAACTGATaTAAGTGG | chr3  | 190711410 | - | 3 | 0 |

**Supplemental Table 4: The Sanger sequencing primers for beta-thalassemia mutant off-target examination**

| Primer      | 5'-Sequence-3'          | nt | note |
|-------------|-------------------------|----|------|
| 88 spOT1-F  | AGGTCAACAGCTTGCCCTTA    | 20 | -88  |
| 88 spOT1-R  | AAGAAATGGAATCCGGGAAC    | 20 |      |
| 88 spOT2-F  | GGAGGACTCAGCTTGGGTTA    | 20 |      |
| 88 spOT2-R  | CCTCACCTCAGCCTTCATGT    | 20 |      |
| 88 spOT3-F  | ATGACCACGCTGAGGCTAAT    | 20 |      |
| 88 spOT3-R  | CTAGGGGAGGATCTGGAGGA    | 20 |      |
| 88 spOT4-F  | GAAAAAGGGGTGAGGCAGAT    | 20 |      |
| 88 spOT4-R  | TGAATTTCAGCACACAACACACT | 22 |      |
| 88 spOT5-F  | AGGAAAGCGTGAATCCTTGA    | 20 |      |
| 88 spOT5-R  | GGTTACCTGCTGGCCAATAA    | 20 |      |
| 88 niOT1-F  | ATCTGCACAGGGAGTGCTTT    | 20 |      |
| 88 niOT1-R  | GCTTTGTGGAACAGGTGGAT    | 20 |      |
| 88 niOT2-F  | CCATTGCGGCTCATTTAGAG    | 20 |      |
| 88 niOT2-R  | CCTTTGGAAGGGATGGAGAC    | 20 |      |
| 88 niOT3-F  | GCCTCCAATAGCAACAGAGC    | 20 |      |
| 88 niOT3-R  | ATGCCCCTGAAATCCTCTCT    | 20 |      |
| 88 niOT4-F  | GTGGAAGGCATTGTGGTTAAG   | 21 |      |
| 88 niOT4-R  | TGCCTTTCACACTCAGGCTA    | 20 |      |
| 88 niOT5-F  | CCCTCATGCAGGAGAGAGAC    | 20 |      |
| 88 niOT5-R  | TGAAAAGTGGGGTGGGAAT     | 19 |      |
| CD6 spOT1-F | GGCTGCAAATCAGAATACCC    | 20 | CD6  |
| CD6 spOT1-R | CACACAGTGGAGCCTTCAAA    | 20 |      |
| CD6 spOT2-F | ACTCACCCAAGGACACCAAG    | 20 |      |
| CD6 spOT2-R | AGGGTGGCAGAGACAGAAGA    | 20 |      |
| CD6 spOT3-F | AGCCTGCTCAGAAGTGAAGC    | 20 |      |
| CD6 spOT3-R | AAGCTCTGCTGACGTTTTCC    | 20 |      |
| CD6 spOT4-F | CCAGTGCCAGACACATAGCA    | 20 |      |
| CD6 spOT4-R | GGAGAGTGCCATGTCAAGGT    | 20 |      |
| CD6 niOT1-F | GGTGTGAGCTGCGAATGATA    | 20 |      |
| CD6 niOT1-R | AAGGCTACACTCAGCCTCCA    | 20 |      |
| CD6 niOT2-F | TGGCCTTAGTCCCAAATCAA    | 20 |      |
| CD6 niOT2-R | GGGACTTAGGTGCCAGTCCT    | 20 |      |

|              |                       |    |                |
|--------------|-----------------------|----|----------------|
| CD6 niOT3-F  | ACTGCAAGTCAAAGGCTGCT  | 20 | CD17/CD19/CD26 |
| CD6 niOT3-R  | CTCCTGACCTCAGGTGATCC  | 20 |                |
| CD6 niOT4-F  | GCCAACCCAGCTGATAGGTA  | 20 |                |
| CD6 niOT4-R  | TGGCTGTTCTCCCATTTAC   | 20 |                |
| CD6 niOT5-F  | GCTCCTCAGACAGAGCATCC  | 20 |                |
| CD6 niOT5-R  | CCTAGGAGTGCCCAGTTCAA  | 20 |                |
| CD17 spOT1-F | GAGCTTGGAAGCCTCGTTAT  | 20 |                |
| CD17 spOT1-R | TTGCCCAGTCTTGGGTATGT  | 20 |                |
| CD17 spOT2-F | AGAGGGGACAGAGGGAAAAA  | 20 |                |
| CD17 spOT2-R | CACGTCACTGCACTCCATCT  | 20 |                |
| CD17 spOT3-F | AGATGTTTGTCCCCACCTTG  | 20 |                |
| CD17 spOT3-R | AGGCTGAGGTGAGAGGATCA  | 20 |                |
| CD17 spOT4-F | AGCCCTTCATCACCTTTCT   | 20 |                |
| CD17 spOT4-R | TCACGAGGAACAGTGTGGTC  | 20 |                |
| CD17 spOT5-F | AACAACGGAAATCCCACAAG  | 20 |                |
| CD17 spOT5-R | CCTTTGGGTCAGTGGTGAGT  | 20 |                |
| CD19 spOT1-F | CAGTGCTAACACCCCGTTTT  | 20 |                |
| CD19 spOT1-R | GCCTGAGTGTGGGAGAGAAG  | 20 |                |
| CD19 spOT2-F | GGGCATGCACATGTTTAAGT  | 20 |                |
| CD19 spOT2-R | GAGAAACCAGGGCACACAAT  | 20 |                |
| CD19 spOT3-F | CAAGACAAGGGACCCTGAAA  | 20 |                |
| CD19 spOT3-R | CCATGCTCTTTGTGTGCAGT  | 20 |                |
| CD19 spOT4-F | AGCTTCCCAGAGGAACTCC   | 20 |                |
| CD19 spOT4-R | TCAGGACCTTCTGAGGCTGT  | 20 |                |
| CD19 spOT5-F | CAAGGGGGCAGGTATTTGTA  | 20 |                |
| CD19 spOT5-R | AACTGGGGCTCAGTGTGATT  | 20 |                |
| CD26 spOT1-F | GCCAGGTTCTTTCTGAGTGG  | 20 |                |
| CD26 spOT1-R | GGGGGAGGAGATGAATTAGC  | 20 |                |
| CD26 spOT2-F | GGAGCTAACAGCCAAACAGG  | 20 |                |
| CD26 spOT2-R | TGATCCACACACTCGAAGGA  | 20 |                |
| CD26 spOT3-F | ATCACAGGGGGTGGTAACCT  | 20 |                |
| CD26 spOT3-R | TATTCATTTCATCCCGGCACT | 20 |                |
| CD26 spOT4-F | AAAGGGAGCAGAGCAAACAA  | 20 |                |
| CD26 spOT4-R | CACCCTGTTCTTCCCACACT  | 20 |                |
| CD26 spOT5-F | CCACACCCGGCTAATTTTTA  | 20 |                |

|               |                        |    |                 |
|---------------|------------------------|----|-----------------|
| CD26 spOT5-R  | CCTCTGTGGGGACAAGAAAA   | 20 |                 |
| CD26 niOT1-F  | CATGACCCCTGGAAAGGATA   | 20 |                 |
| CD26 niOT1-R  | GAGTTGGGAGCTGTGGAGTC   | 20 |                 |
| CD26 niOT2-F  | TCCGAACTGCAGGAAAAATAAA | 21 |                 |
| CD26 niOT2-R  | CTCTGTCACCCAGGCTGTAGT  | 21 |                 |
| CD26 niOT3-F  | AAGGCCACTTGTGAGAGCAC   | 20 |                 |
| CD26 niOT3-R  | TCCTGGCTACCCCAATGTAA   | 20 |                 |
| CD26 niOT4-F  | GTCAGGAGACCGAGACCATC   | 20 |                 |
| CD26 niOT4-R  | AGCCAGGCTGAATATGATGC   | 20 |                 |
| CD26 niOT5-F  | TACCTTGGCCACTCACACAG   | 20 |                 |
| CD26 niOT5-R  | CGGTGTCTGCAACTCAAGAA   | 20 |                 |
| IVS-1 spOT1-F | GAGACCAAAATGGCCAGATG   | 20 |                 |
| IVS-1 spOT1-R | AGAACAGGGCGAGAGATGTG   | 20 |                 |
| IVS-1 spOT2-F | ACCGGATCTACACCATCAGC   | 20 |                 |
| IVS-1 spOT2-R | CCACAGCCCTTGACAAGTTT   | 20 |                 |
| IVS-1 spOT3-F | AGGACGAAAAGGAGGAGGAG   | 20 |                 |
| IVS-1 spOT3-R | GTAGGGGAACAAGGGAGAGG   | 20 |                 |
| IVS-1 spOT4-F | CCAGAAGCTGCTTTCCATCT   | 20 |                 |
| IVS-1 spOT4-R | CGTCCCATTTGTTTCTCGTTT  | 20 |                 |
| IVS-1 spOT5-F | TCATGACCCCAAAATTGGTT   | 20 |                 |
| IVS-1 spOT5-R | TCACTCCCCTGACCAACTGC   | 19 | IVS-I-1/IVS-I-5 |
| IVS-1 niOT1-F | GCCTGGAGAAGTCACCAAAG   | 20 |                 |
| IVS-1 niOT1-R | CTGGTCCCAAGATTGGATTG   | 20 |                 |
| IVS-1 niOT2-F | CGTGGACATAAGGCAGAGTG   | 20 |                 |
| IVS-1 niOT2-R | CGCAAGCACATGCACTAAAT   | 20 |                 |
| IVS-1 niOT3-F | GGGGCATTGGAATAGAATGA   | 20 |                 |
| IVS-1 niOT3-R | CCCTCCAGAAGTCACAGCAT   | 20 |                 |
| IVS-1 niOT4-F | TTTCAAAAACCCACCTTTGG   | 20 |                 |
| IVS-1 niOT4-R | TCTGCAAAATGTATGGAAACCA | 21 |                 |
| IVS-1 niOT5-F | ATGCTACCGGAGAAGCTGTT   | 20 |                 |
| IVS-1 niOT5-R | CCCTCAAAACTCATCACCAA   | 20 | CD39            |
| CD39 spOT1-F  | AAGCATGTCCTGCAAAATCA   | 20 |                 |
| CD39 spOT1-R  | GCCTTGCAATCAGCTTTCTCT  | 20 |                 |
| CD39 spOT2-F  | GTTTGGGAGTGTTTCCCTGA   | 20 |                 |
| CD39 spOT2-R  | TCCCTGCTTACCCTCAGTTG   | 20 |                 |

|              |                       |    |         |
|--------------|-----------------------|----|---------|
| CD39 spOT3-F | GACCATGGACAGTGAGCAAA  | 20 | CD71/72 |
| CD39 spOT3-R | CTGAAGATGCCAACCTGAT   | 20 |         |
| CD39 spOT4-F | ACTTTCCTCCAAGTGCCTGA  | 20 |         |
| CD39 spOT4-R | AGACCTGGAGAAACCCAGT   | 20 |         |
| CD39 spOT5-F | CATGGTGCATCTGACTCCTG  | 20 |         |
| CD39 spOT5-R | GAGCCAGGCCATCACTAAAG  | 20 |         |
| CD39 niOT1-F | TTGAATGGGAGGTGGGTTTA  | 20 |         |
| CD39 niOT1-R | GGGCTCAGAGAGGAACACAA  | 20 |         |
| CD39 niOT2-F | GTTCCACTGGCCAAAGATGT  | 20 |         |
| CD39 niOT2-R | TGGCTGGTTTCTCTCAATTC  | 21 |         |
| CD39 niOT3-F | TGTGCACAAAGACAATGCAG  | 20 |         |
| CD39 niOT3-R | CCCCTTCATCCATGACTAGC  | 20 |         |
| CD39 niOT4-F | AGGGCATGAGAATCAACACC  | 20 |         |
| CD39 niOT4-R | GATGAGAAATGGGGAAGACCA | 20 |         |
| CD39 niOT5-F | ATTACAGGCATGCCACCAC   | 19 |         |
| CD39 niOT5-R | TTCCCTGGAATTGGAACACT  | 20 |         |
| 7172 spOT1-F | AGTGTGACGACGGAAGCTCT  | 20 |         |
| 7172 spOT1-R | CAAGCATCACGGTTGAGAGA  | 20 |         |
| 7172 spOT2-F | CCTTGCCCTCATGGATCTTA  | 20 |         |
| 7172 spOT2-R | TCCCTATTTTGCCACCACTC  | 20 |         |
| 7172 spOT3-F | AGTGATTCTCCTGCCTCAGC  | 20 |         |
| 7172 spOT3-R | CAAGGAAGGACTGCTCAAGG  | 20 |         |
| 7172 spOT4-F | CAGGTGGGATCACTGCAAAT  | 20 |         |
| 7172 spOT4-R | TCATTCTCTCCAGGACACC   | 20 |         |
| 7172 spOT5-F | CAGACCCAGCCAAATGTCTT  | 20 |         |
| 7172 spOT5-R | GAAAATCCCAGGAGCACAAA  | 20 |         |
| 7172 niOT1-F | GACACAGGGGCTGAGTGTCT  | 20 |         |
| 7172 niOT1-R | TCAGCTCGAGTCAGGTGTGT  | 20 |         |
| 7172 niOT2-F | GCGCATCTTCTGTCCGTACT  | 20 |         |
| 7172 niOT2-R | CTCCGCCTTGGGTTTTCTAT  | 20 |         |
| 7172 niOT3-F | ATCTGCAAGCTCCACAGGAT  | 20 |         |
| 7172 niOT3-R | CACTGCAAGGTACAGGGTCA  | 20 |         |
| 7172 niOT4-F | GCAGGTGTTAGGGAAGCAAC  | 20 |         |
| 7172 niOT4-R | GAGGAAGATTTCCCCTGGAG  | 20 |         |
| 7172 niOT5-F | TACGCCAAGGTGAAGTTTCC  | 20 |         |

|              |                          |    |            |
|--------------|--------------------------|----|------------|
| 7172 niOT5-R | GCTTCTGCAATGCTTGACTG     | 20 | IVS-II-1   |
| II-1 spOT1-F | GGGAAGCACCTGTTTTCTCA     | 20 |            |
| II-1 spOT1-R | ATTCCGAAGTGCAGTTTGCT     | 20 |            |
| II-1 spOT2-F | GGTTGCTCCAGAACTCCAG      | 20 |            |
| II-1 spOT2-R | GGAAGCTCCACACTGACCTC     | 20 |            |
| II-1 spOT3-F | TTTGCCAAAACCTTACTTGGAAGA | 23 |            |
| II-1 spOT3-R | TGCAGATGCCAGAAACCATA     | 20 |            |
| II-1 spOT4-F | CCTAAGGTGAAGGCTCATGG     | 20 |            |
| II-1 spOT4-R | AGGGGGTTGGGAGAGAAAAG     | 19 |            |
| II-1 spOT5-F | AGGGATTAGCCCGTTGTCTT     | 20 |            |
| II-1 spOT5-R | CAAGAGAAAGCCACCTCTGC     | 20 |            |
| II-1 niOT1-F | AAATGGGAAGAGAAGCCAAA     | 20 |            |
| II-1 niOT1-R | TGACTCTTCCAATCCCTGAA     | 20 |            |
| II-1 niOT2-F | AACCCACCCAGTTGTTTGTG     | 20 |            |
| II-1 niOT2-R | CTGGACCCGAAGCATAGAAA     | 20 |            |
| II-1 niOT3-F | TTCATGCCGTGAGTCTTCCT     | 20 |            |
| II-1 niOT3-R | CCTGCAAAGCATTGCTGAAT     | 20 |            |
| II-1 niOT4-F | CCAGTTACTTGGGAGGCTGA     | 20 |            |
| II-1 niOT4-R | TGCTCAGGTTTGTCCCTTTC     | 20 |            |
| II-1 niOT5-F | AACTGCCCCAGAAACACTCT     | 20 |            |
| II-1 niOT5-R | ACCAGCACTCTGTACTCCGT     | 20 |            |
| 745 spOT1-F  | CCTTCTTTCTGGGAAGGTGA     | 20 | IVS-II-745 |
| 745 spOT1-R  | GAGACGTCCATGGGCTAACT     | 20 |            |
| 745 spOT2-F  | AAAACATCTGATGGGAACACG    | 21 |            |
| 745 spOT2-R  | GTACTGGGCTGGAAGTCAGG     | 20 |            |
| 745 spOT3-F  | CAAAGACGTCAAGGAGAGCAG    | 21 |            |
| 745 spOT3-R  | TCAAACCCATGTTGCTCAAA     | 20 |            |
| 745 spOT4-F  | CCCCCGGCTAATTTTGTATT     | 20 |            |
| 745 spOT4-R  | CCCCCATCTGCTTAAGTGAC     | 20 |            |
| 745 spOT5-F  | CCAATGTGGAGTGATTTCOA     | 20 |            |
| 745 spOT5-R  | TTTTGCATTACCTTTCCTG      | 20 |            |
| 745 niOT1-F  | GGCACTGGATAAAGCTTCCA     | 20 |            |
| 745 niOT1-R  | GGCAGGATGACAGATGAGGT     | 20 |            |
| 745 niOT2-F  | GATCTCTGCCCTGGAGAACA     | 20 |            |
| 745 niOT2-R  | GACAATGAGGACCAGCCAAT     | 20 |            |

|             |                       |    |
|-------------|-----------------------|----|
| 745 niOT3-F | CTGGCATTTCATAGATGTGC  | 22 |
| 745 niOT3-R | TTGCCTTCCTGTTTCTGCTT  | 20 |
| 745 niOT4-F | TCCCATTCTTTCCCTTGTTG  | 20 |
| 745 niOT4-R | TGCCAATGCCCATAGTGTA   | 20 |
| 745 niOT5-F | GGTCCACACTGCTCTCACTTC | 21 |
| 745 niOT5-R | ACTCTGGCCGTTGATCATT   | 20 |

**Supplemental Table 5: Primers for qPCR**

| Gene             | forward (5'-3')         | reverse (5'-3')          |
|------------------|-------------------------|--------------------------|
| <i>HBA</i>       | AACTTCAAGCTCCTAAGCCA    | CAGGAACCTGTCCAGGGAG      |
| <i>HBG</i>       | GAACCTCAAGCTCCTGGGA     | AGTCACCATCTTCTGCCAG      |
| <i>HBB</i>       | GAGAACTTCAGGCTCCTGG     | ACTTTCTGATAGGCAGCCTG     |
| <i>GAPDH</i>     | TCATTTCCCTGGTATGACAACGA | GTCTTACTCCTTGGAGGCC      |
| <i>BCL11A</i>    | GGGTATTTGTAAAGATGAGCCC  | TGCAAGAGAAACCATGCAC      |
| <i>GATA1</i>     | ACTACCTATGCAACGCCTG     | TTACTGACAATCAGGCGCT      |
| <i>GATA2</i>     | CAAGCTGCACAATGTTAACAG   | GACTTGTTGGACATCTTCCG     |
| <i>GYP A</i>     | TCTTACGGTATTCGCCGAC     | TCATTGATCACTTGTCTCTGGA   |
| <i>KLF1</i>      | TGACTTCCTCAAGTGGTGG     | CTCAGACTTCACGTGGAGG      |
| <i>EPOR</i>      | GAGACACCCATGACGTCTC     | GATCTCCACCCTCTGTACG      |
| <i>GFI1B</i>     | GTGAAGTGCAACAAGGAGC     | GTCTGAGTGGATGAGCAGG      |
| <i>MYB</i>       | AATGTCTCCAGTCATGTTCC    | ATAGTGTCTCTGAATGGCTG     |
| <i>Band3</i>     | ATGAAGACCCAGACATCCC     | CCACATAGACCTTGTGGGT      |
| <i>Band4.1</i>   | TCAGACTCGGAATCCAAGC     | CTTGTCAGTGACCTCCCTC      |
| <i>Ank1</i>      | TGAGTTTCAGAATATTCCAGGG  | TGCGAATGATCTTCTTGGT      |
| <i>SPTA1</i>     | AAATGACTTTGCTGTCCATGAG  | TCCTGCAACACCTTATTTAGGA   |
| <i>AHSP</i>      | TCAAGAGTGTGGGAGTTCAG    | AGTCACCATGTCTTCTTCAGAG   |
| <i>E2F2</i>      | CAACTTTAAGGAGCAGACAGTG  | CAGGTTGTCCTCAGTCCTG      |
| <i>FOG1</i>      | CAGCGCAGATGTAACTCAC     | CTGGTTCCTGTCCTTCCAG      |
| <i>BCL-xL</i>    | GGCGGATTTGAATCTCTTTCTC  | AGAAAGTCAACCACCAGCT      |
| <i>HSP70</i>     | CTGGAACTATGAATAGAGGCA   | AAACACTACGAAGTGGTGG      |
| <i>Caspase-3</i> | AATGGATTATCCTGAGATGGG   | GACCGAGATGTCATTCCAG      |
| <i>JAK2</i>      | GACAGATGATCGTGTTCCTCA   | TCATATAGATCTCATCTGGGCA   |
| <i>FAS-L</i>     | ATTTAACAGGCAAGTCCAACCTC | TCACTCCAGAAAGCAGGAC      |
| <i>PRDX2</i>     | CTACAAAGGGAAGTACGTGGT   | GAACTGAGAGTCCACCGAG      |
| <i>TWSG1</i>     | AATGCCTCATTCAGGAGCT     | CAAGACACAGCATGCACTC      |
| <i>LYZ</i>       | TTGAAAGGTGTGAGTTGGC     | AACACATCCAGTTTGCTAGG     |
| <i>TUBB6</i>     | AAGTGATCAGCGATGAGCA     | CACATATTTCTGAGACGATGACTC |
| <i>UCHL1</i>     | ATTGGGAATTCTGTGGCA      | TGATCCATCCTCAAATCCCAG    |
| <i>SMAD1</i>     | TATGAGCTTTGTGAAGGGCT    | AGATGTATCTCAATCCAGCAGG   |
| <i>TGFB3</i>     | GAAATCAAATTCAAAGGCGTG   | GTGATCCTTCTGCTTCTTGAG    |
| <i>STAT5</i>     | TTCAACAGGGAGAACTTGC     | GTGCTTCTTCAACACCTCC      |

|                  |                        |                          |
|------------------|------------------------|--------------------------|
| <i>BCL-xL</i>    | GGCGGATTTGAATCTCTTTCTC | AGAAAGTCAACCACCAGCT      |
| <i>HSP70</i>     | CTGGAAGTATGAATAGAGGCA  | AAACACTACGAAGTGGTGG      |
| <i>Caspase-3</i> | AATGGATTATCCTGAGATGGG  | GACCGAGATGTCATTCCAG      |
| <i>JAK2</i>      | GACAGATGATCGTGTTC      | TCATATAGATCTCATCTGGGCA   |
| <i>FAS-L</i>     | ATTTAACAGGCAAGTCCAATC  | TCACTCCAGAAAGCAGGAC      |
| <i>PRDX2</i>     | CTACAAAGGGGAAGTACGTGGT | GAACTGAGAGTCCACCGAG      |
| <i>TWSG1</i>     | AATGCCTCATTCAAGAGCT    | CAAGACACAGCATGCACTC      |
| <i>LYZ</i>       | TTGAAAGGTGTGAGTTGGC    | AACACATCCAGTTTGCTAGG     |
| <i>TUBB6</i>     | AAGTGATCAGCGATGAGCA    | CACATATTTCTGAGACGATGACTC |
| <i>UCHL1</i>     | ATTGGGAATTCTGTGGCA     | TGATCCATCCTCAAATCCCAG    |
| <i>SMAD1</i>     | TATGAGCTTTGTGAAGGGCT   | AGATGTATCTCAATCCAGCAGG   |
| <i>TGFB3</i>     | GAAATCAAATTCAAAGGCGTGG | GTGATCCTTCTGCTTCTTGAG    |
| <i>STAT5</i>     | TTCAACAGGGAGAACTTG     | GTGCTTCTTCAACACCTCC      |
| <i>AKT1</i>      | CTTCTTTGCCGGTATCGTG    | TGCTGTCATCTTGGTCAGG      |
| <i>CASP8</i>     | CTGGATGATGACATGAACCTG  | GATGTCCAACCTTCTCTCC      |
| <i>CASP9</i>     | AAACCAGAGGTTCTCAGACC   | AACTCTCAAGAGCACCGAC      |
| <i>TNF</i>       | CTCTAATCAGCCCTCTGGC    | GAGGGTTTGCTACAACATGG     |
| <i>TNFSF10</i>   | GATCTTCACAGTGCTCCTG    | TACTTGTCCTGCATCTGCT      |
| <i>GDF15</i>     | TAGACAAGGAGAGCCAGGA    | ATGAGGACACCATTCCAGC      |
| <i>GDF11</i>     | ATCAACGCCTTTGATCCCA    | CTCCATGAATGGATGCAGC      |
| <i>CCNA2</i>     | GCCATCAGTTATTGCTGGA    | CGTATTAATGATTCAAGGCCAG   |
| <i>CDK2</i>      | CTCATCAAGAGCTATCTGTTCC | TTTAAGGTCTCGGTGGAGG      |
| <i>TFRC</i>      | CAGCAAAGTTGAGAACTCAC   | CAGAAAGAACTGCTGGGA       |
| <i>SMAD2</i>     | AGGACGATTAGATGAGCTTGAG | GAGCAAGTGCTTGGTATGG      |
| <i>SMAD3</i>     | ACTACAGCCATTCCATCCC    | TAGGTTTGAGAACCTGCG       |
| <i>CD79A</i>     | GAACCGAATCATCACAGCC    | CCATCGTTTCTGAACAGC       |
| <i>CRHBP</i>     | TTCTTCCGAGTCCATGAACC   | AATGACATTGCAAGGAAAGAGG   |

**Supplemental Table 6: Raw data of qPCR**

| Ct values for qPCR |              |                                  |          |          |          |          |          |          |          |          |          |          |            |
|--------------------|--------------|----------------------------------|----------|----------|----------|----------|----------|----------|----------|----------|----------|----------|------------|
| raw data           |              | Before erythroid differentiation |          |          |          |          |          |          |          |          |          |          |            |
|                    |              | WT                               | -88      | CD6      | CD17     | CD19     | CD26     | IVS-I-1  | IVS-I-5  | CD39     | CD7172   | IVS-II-1 | IVS-II-745 |
| well               | Gene         | Ct value                         | Ct value | Ct value | Ct value | Ct value | Ct value | Ct value | Ct value | Ct value | Ct value | Ct value | Ct value   |
| A1                 | <i>HBA</i>   | 17.53                            | 15.97    | 14.27    | 15.26    | 16.6     | 18.39    | 14.94    | 16.11    | 16.27    | 14.86    | 14.96    | 14.75      |
| A2                 |              | 16.66                            | 15.62    | 13.82    | 15.27    | 16.46    | 18.1     | 15.94    | 15.79    | 15.61    | 14.68    | 15.16    | 14.16      |
| A3                 |              | 17.09                            | 15.54    | 13.97    | 15.48    | 16.44    | 18.48    | 16.16    | 15.77    | 15.96    | 14.84    | 15.43    | 14.74      |
| A4                 | <i>KLF1</i>  | 23.56                            | 24.12    | 22.84    | 23.09    | 23.58    | 23.7     | 23.43    | 23.63    | 23.25    | 23.23    | 23.88    | 22.99      |
| A5                 |              | 23.6                             | 24.05    | 22.92    | 22.7     | 23.33    | 23.38    | 23.09    | 23.33    | 23.06    | 23.21    | 23.5     | 22.96      |
| A6                 |              | 23.55                            | 23.89    | 22.28    | 22.58    | 23.33    | 23.23    | 22.97    | 23.26    | 22.92    | 22.95    | 22.97    | 22.85      |
| A7                 | <i>AHSP</i>  | 27                               | 26.36    | 25.21    | 26.39    | 27.69    | 28.79    | 26.35    | 26.34    | 26.44    | 26.26    | 24.6     | 26.05      |
| A8                 |              | 27.03                            | 26.85    | 25.76    | 26.33    | 27.79    | 27.85    | 25.99    | 26.3     | 26.21    | 26.07    | 24.45    | 26.02      |
| A9                 |              | 26.88                            | 26.76    | 24.94    | 26.19    | 27.05    | 27.69    | 25.9     | 26.35    | 26.29    | 26.02    | 24.56    | 26.53      |
| A10                | <i>PRDX2</i> | 17.49                            | 16.94    | 16.56    | 16.3     | 17.08    | 18.22    | 16.6     | 16.67    | 16.39    | 16.22    | 16.57    | 17.24      |
| A11                |              | 17.39                            | 16.94    | 15.96    | 16.44    | 17.04    | 18.18    | 16.56    | 16.68    | 16.53    | 16.41    | 16.41    | 16.81      |
| A12                |              | 17.31                            | 16.92    | 15.86    | 16.43    | 17.09    | 18.21    | 16.64    | 16.55    | 16.6     | 16.44    | 16.47    | 16.81      |
| B1                 | <i>HBB</i>   | 12.41                            | 12.12    | 12.68    | 11.91    | 13.57    | 13.46    | 16.22    | 15.46    | 17.38    | 15.79    | 16.2     | 16.61      |
| B2                 |              | 12.61                            | 12.13    | 12.85    | 12.11    | 13.51    | 13.2     | 16.35    | 15.16    | 17.38    | 15.8     | 16.53    | 16.78      |
| B3                 |              | 12.66                            | 12.13    | 12.82    | 12.03    | 13.53    | 13.2     | 16.36    | 15.17    | 17.47    | 15.81    | 16.51    | 16.8       |
| B4                 | <i>EPOR</i>  | 25.17                            | 25.02    | 24.41    | 25.01    | 25.68    | 25.8     | 25.13    | 25.11    | 25.53    | 25.13    | 25.91    | 25.51      |
| B5                 |              | 25.11                            | 24.85    | 23.93    | 24.87    | 25.55    | 25.79    | 25.01    | 24.91    | 25.44    | 24.99    | 25.94    | 25.23      |
| B6                 |              | 24.76                            | 24.54    | 23.59    | 24.65    | 24.91    | 25.39    | 24.62    | 24.39    | 25.02    | 24.63    | 25.07    | 24.88      |
| B7                 | <i>E2F2</i>  | 24.99                            | 23.4     | 23.14    | 23.91    | 24.87    | 25.36    | 24.69    | 24.76    | 24.97    | 23.78    | 24.7     | 24.21      |
| B8                 |              | 25.14                            | 23.43    | 23.17    | 24.04    | 25.1     | 25.52    | 24.82    | 24.95    | 24.82    | 23.87    | 24.61    | 24.42      |
| B9                 |              | 25.15                            | 23.53    | 23.51    | 24.09    | 25.14    | 25.35    | 24.84    | 25.03    | 24.95    | 23.87    | 24.68    | 24.42      |
| B10                | <i>TWSG1</i> | 26.1                             | 26.75    | 26.42    | 26.67    | 25.9     | 26.05    | 26.16    | 25.91    | 25.87    | 26.14    | 26.42    | 26.68      |
| B11                |              | 26.11                            | 26.74    | 26.62    | 26.42    | 25.94    | 25.97    | 25.95    | 25.98    | 25.39    | 26.12    | 26.4     | 26.69      |
| B12                |              | 26.8                             | 26.78    | 26.44    | 27       | 25.88    | 26.1     | 26.76    | 26.44    | 25.55    | 26.68    | 26.65    | 27.23      |
| C1                 | <i>HBG</i>   | 21.18                            | 20.37    | 18.5     | 15.77    | 21.85    | 22.82    | 18.81    | 19.37    | 11.82    | 17.18    | 15.66    | 14.98      |
| C2                 |              | 20.92                            | 20.46    | 18.6     | 15.87    | 21.84    | 22.85    | 18.92    | 18.96    | 11.82    | 17.18    | 15.65    | 14.85      |
| C3                 |              | 20.88                            | 20.37    | 18.67    | 15.89    | 21.83    | 22.83    | 18.91    | 19.01    | 11.88    | 17.21    | 15.71    | 14.85      |
| C4                 | <i>GF1B</i>  | 24.54                            | 24.65    | 24.15    | 24.54    | 23.91    | 25.01    | 24.62    | 24.66    | 24.33    | 24.84    | 24.74    | 25.64      |
| C5                 |              | 24.45                            | 24.63    | 24.01    | 24       | 23.7     | 24.99    | 24.72    | 24.51    | 24.57    | 24.77    | 24.72    | 25.54      |

|     |                |       |       |       |       |       |       |       |       |       |       |       |       |
|-----|----------------|-------|-------|-------|-------|-------|-------|-------|-------|-------|-------|-------|-------|
| C6  |                | 24.57 | 24.68 | 23.99 | 24.02 | 23.87 | 24.81 | 24.55 | 24.54 | 24.05 | 24.7  | 24.46 | 25.19 |
| C7  | <i>TALI</i>    | 30.99 | 30.57 | 29.77 | 30.12 | 31.07 | 30.31 | 30.11 | 30.64 | 31.05 | 29.87 | 31.12 | 30.63 |
| C8  |                | 31.14 | 30.79 | 30.62 | 30.6  | 31.34 | 30.96 | 30.56 | 30.29 | 31.47 | 29.81 | 32.53 | 31.1  |
| C9  |                | 31.03 | 30.74 | 29.78 | 29.95 | 30.63 | 30.19 | 30.02 | 30.95 | 31.39 | 29.79 | 31.47 | 30.62 |
| C10 | <i>LYZ</i>     | 32.45 | 35.32 | 33.37 | 34.7  | 35.34 | 32.27 | 32.71 | 34.57 | 32.58 | 33.54 | 35.32 | 33.48 |
| C11 |                | 32.96 | 35.44 | 34.31 | 34.32 | 35.85 | 30.96 | 33.38 | 34.54 | 32.39 | 33.96 | 35.46 | 32.85 |
| C12 |                | 34.36 | 34.86 | 34.18 | 33.66 | 35.02 | 32.11 | 33.8  | 34.43 | 32.7  | 34.87 | 35.4  | 33.89 |
| D1  | <i>GAPDH</i>   | 17.81 | 18.56 | 18.41 | 17.65 | 17.33 | 17.47 | 17.39 | 17.05 | 16.61 | 17.5  | 17.36 | 17.9  |
| D2  |                | 17.68 | 18.55 | 18.37 | 17.66 | 17.18 | 17.41 | 17.57 | 17.01 | 16.7  | 17.5  | 17.15 | 17.65 |
| D3  |                | 17.6  | 18.48 | 18.36 | 17.76 | 17.17 | 17.41 | 17.49 | 17.04 | 16.73 | 17.47 | 17.13 | 17.63 |
| D4  | <i>C-MYB</i>   | 20.98 | 22.51 | 22.37 | 21.67 | 20.85 | 20.69 | 21.09 | 20.89 | 20.54 | 21.94 | 21.69 | 22.16 |
| D5  |                | 20.99 | 22.59 | 22.15 | 21.65 | 20.83 | 20.62 | 21.06 | 20.91 | 20.54 | 21.9  | 21.73 | 22.09 |
| D6  |                | 20.95 | 22.5  | 22.15 | 21.61 | 20.83 | 20.66 | 21.03 | 20.85 | 20.53 | 21.9  | 21.67 | 22.09 |
| D7  | <i>BCL-xL</i>  | 23.76 | 23.2  | 22.91 | 23.15 | 23.53 | 23.88 | 23.5  | 23.76 | 23.64 | 23.38 | 23.74 | 23.88 |
| D8  |                | 23.78 | 23.36 | 22.92 | 23.18 | 23.54 | 23.66 | 23.6  | 23.76 | 23.62 | 23.38 | 24.09 | 23.77 |
| D9  |                | 23.8  | 23.4  | 22.98 | 23.34 | 23.51 | 23.54 | 23.5  | 23.82 | 23.43 | 23.39 | 23.8  | 23.82 |
| D10 | <i>TUBB6</i>   | 24.7  | 24.93 | 24.58 | 24.78 | 24.67 | 26.81 | 24.44 | 24.49 | 24.95 | 24.76 | 24.72 | 24.71 |
| D11 |                | 24.68 | 24.85 | 24.54 | 24.82 | 24.63 | 25.01 | 24.6  | 24.65 | 24.53 | 24.68 | 24.84 | 24.83 |
| D12 |                | 25.33 | 25.76 | 25.18 | 24.84 | 25.34 | 24.68 | 24.93 | 25.02 | 25.18 | 25.15 | 25.2  | 25.19 |
| E1  | <i>BCL11A</i>  | 24.62 | 23.79 | 24.42 | 23.98 | 23.92 | 24.14 | 24.3  | 23.91 | 25.59 | 24.8  | 24.53 | 26.63 |
| E2  |                | 24.43 | 23.86 | 24.06 | 24.4  | 23.89 | 24.31 | 24.36 | 23.75 | 25.77 | 24.81 | 24.75 | 25.92 |
| E3  |                | 24.18 | 23.8  | 24.01 | 24.28 | 23.86 | 24.2  | 24.36 | 23.75 | 25.63 | 24.85 | 24.53 | 25.98 |
| E4  | <i>Band3</i>   | 23.73 | 21.91 | 20.8  | 21.45 | 23.82 | 25.74 | 22.16 | 23.1  | 22.99 | 21.55 | 22.56 | 22.05 |
| E5  |                | 23.72 | 21.91 | 20.8  | 21.45 | 23.84 | 25.68 | 22.19 | 23.1  | 23.02 | 21.54 | 22.57 | 22.09 |
| E6  |                | 23.77 | 21.87 | 20.71 | 21.33 | 23.78 | 25.69 | 22.19 | 23.09 | 23    | 21.55 | 22.48 | 22.05 |
| E7  | <i>HSP70</i>   | 21.82 | 22.62 | 22.17 | 21.88 | 21.59 | 23.72 | 21.86 | 21.48 | 21.15 | 21.68 | 21.74 | 22.15 |
| E8  |                | 21.85 | 22.73 | 22.22 | 21.83 | 21.5  | 21.93 | 21.91 | 21.43 | 21.21 | 21.8  | 21.8  | 22.18 |
| E9  |                | 21.85 | 22.76 | 22.35 | 21.89 | 21.61 | 21.75 | 21.85 | 21.57 | 21.16 | 21.67 | 21.77 | 22.13 |
| E10 | <i>UCHL1</i>   | 28.96 | 37.43 | 33.67 | 28.71 | 26.79 | 37.73 | 31.98 | 29.96 | 27.81 | 31.45 | 28.99 | 32.25 |
| E11 |                | 28.56 | 34.51 | 37.76 | 28.91 | 26.75 | 34.26 | 33.29 | 30.86 | 27.54 | 31.94 | 29.53 | 32.68 |
| E12 |                | 29.77 | 35.93 | 34.25 | 29.06 | 27.94 | 35.22 | 32.99 | 31.19 | 27.79 | 33.44 | 29.92 | 32.93 |
| F1  | <i>GATA1</i>   | 23.5  | 23.56 | 22.94 | 22.96 | 23.19 | 22.89 | 23.04 | 23.67 | 23.46 | 23.46 | 23.65 | 24.18 |
| F2  |                | 23.49 | 23.27 | 22.98 | 23.19 | 23.1  | 22.81 | 23.04 | 23.66 | 23.45 | 23.2  | 23.68 | 23.87 |
| F3  |                | 23.46 | 23.44 | 22.94 | 23.05 | 23.08 | 22.85 | 23.03 | 23.63 | 23.48 | 23.14 | 23.67 | 23.89 |
| F4  | <i>Band4.1</i> | 22.9  | 22.42 | 22.08 | 22.2  | 22.68 | 22.68 | 22.6  | 22.88 | 22.67 | 22.38 | 23.08 | 22.9  |

|     |                  |       |       |       |       |       |       |       |       |       |       |       |       |
|-----|------------------|-------|-------|-------|-------|-------|-------|-------|-------|-------|-------|-------|-------|
| F5  |                  | 22.89 | 22.41 | 22.11 | 22.2  | 22.64 | 22.68 | 22.62 | 22.91 | 22.67 | 22.39 | 23.02 | 22.89 |
| F6  |                  | 22.91 | 22.41 | 22.04 | 22.21 | 22.65 | 22.69 | 22.58 | 22.86 | 22.64 | 22.21 | 22.98 | 22.92 |
| F7  | <i>Caspase-3</i> | 22.4  | 23.04 | 22.81 | 22.72 | 22.66 | 22.09 | 22.39 | 21.98 | 22.26 | 22.57 | 22.73 | 22.84 |
| F8  |                  | 22.2  | 23.01 | 22.79 | 22.44 | 22.58 | 22.08 | 22.41 | 21.97 | 21.91 | 22.6  | 22.71 | 22.81 |
| F9  |                  | 22.16 | 23.02 | 22.83 | 22.58 | 22.59 | 22.1  | 22.45 | 21.99 | 22.13 | 22.6  | 22.66 | 22.84 |
| F10 | <i>SMAD1</i>     | 29.58 | 33.25 | 34.14 | 27.04 | 33.7  | 35.58 | 33.64 | 33.29 | 34.53 | 33.67 | 32.75 | 33.65 |
| F11 |                  | 29.41 | 33.66 | 34.74 | 27.14 | 32.97 | 34.43 | 33.93 | 33.59 | 37.18 | 32.91 | 32.99 | 33.59 |
| F12 |                  | 30.02 | 35.71 | 34.83 | 27.19 | 32.85 | 36.91 | 33.77 | 33.39 | 32.89 | 32.88 | 33.3  | 34.24 |
| G1  | <i>GATA2</i>     | 23.68 | 25.13 | 24.1  | 24.55 | 22.89 | 23.56 | 23.23 | 22.94 | 23.57 | 24.52 | 23.93 | 24.25 |
| G2  |                  | 23.7  | 25.19 | 24.17 | 25    | 22.87 | 23.65 | 23.08 | 22.95 | 23.69 | 24.61 | 23.98 | 24.4  |
| G3  |                  | 23.69 | 25.41 | 24.22 | 24.85 | 22.84 | 23.67 | 23.02 | 22.91 | 23.61 | 24.62 | 23.96 | 24.36 |
| G4  | <i>Ank1</i>      | 20.36 | 19.93 | 19.46 | 19.65 | 19.94 | 20.05 | 19.91 | 20    | 19.77 | 19.57 | 20.24 | 20.12 |
| G5  |                  | 20.22 | 19.8  | 19.42 | 19.58 | 19.91 | 20.03 | 19.86 | 19.95 | 19.77 | 19.47 | 20.42 | 20.14 |
| G6  |                  | 20.34 | 19.9  | 19.39 | 19.51 | 19.93 | 20    | 19.9  | 19.97 | 19.8  | 19.48 | 20.21 | 20.03 |
| G7  | <i>JAK2</i>      | 23.97 | 23.43 | 23.12 | 23.3  | 23.61 | 23.98 | 23.63 | 23.4  | 23.5  | 23.27 | 23.55 | 23.75 |
| G8  |                  | 23.75 | 23.39 | 23.14 | 23.31 | 23.56 | 23.95 | 23.82 | 23.34 | 23.43 | 23.21 | 23.46 | 23.62 |
| G9  |                  | 23.9  | 23.35 | 23.38 | 23.27 | 23.43 | 23.96 | 23.61 | 23.44 | 23.47 | 23.22 | 23.47 | 23.75 |
| G10 | <i>TGFB3</i>     | 28.56 | 29.68 | 29.6  | 29.17 | 28.63 | 28.1  | 28.05 | 28.62 | 29.04 | 28.25 | 29.25 | 29.81 |
| G11 |                  | 28.71 | 29.5  | 29.47 | 29.02 | 28.47 | 28.05 | 27.97 | 28.52 | 28.87 | 28.72 | 29.4  | 29.73 |
| G12 |                  | 28.91 | 29.88 | 29.97 | 29.72 | 28.48 | 28.65 | 28.18 | 28.96 | 29.92 | 29.13 | 29.95 | 30.33 |
| H1  | <i>GYP A</i>     | 19.79 | 19    | 17.94 | 18.58 | 19.17 | 20.18 | 19.38 | 19.12 | 19.03 | 18.18 | 17.79 | 18.89 |
| H2  |                  | 19.87 | 18.98 | 17.97 | 18.64 | 19.09 | 20.34 | 19.21 | 19.06 | 19.39 | 18.5  | 17.78 | 18.92 |
| H3  |                  | 19.86 | 18.97 | 17.99 | 19.09 | 19.13 | 20.16 | 19.38 | 19.05 | 19.3  | 18.3  | 18.41 | 18.89 |
| H4  | <i>SPTA1</i>     | 21.11 | 20.76 | 20.4  | 21.45 | 21.12 | 21.06 | 21.17 | 20.71 | 21.27 | 20.85 | 21.48 | 20.96 |
| H5  |                  | 21.13 | 20.73 | 20.4  | 21.39 | 21.09 | 21.05 | 21.12 | 20.73 | 21.29 | 20.92 | 21.28 | 20.93 |
| H6  |                  | 21.13 | 20.71 | 20.44 | 21.14 | 21.03 | 21.08 | 21.14 | 20.71 | 21.01 | 21.12 | 20.95 | 20.96 |
| H7  | <i>FAS-L</i>     | 35.5  | 33.4  | 31.88 | 27.58 | 32.86 | 30.13 | 29.66 | 32.36 | 34.42 | 35.22 | 34.23 | 35.28 |
| H8  |                  | 35.41 | 35.33 | 30    | 28.58 | 32.59 | 31.14 | 32.78 | 34.86 | 34.35 | 34.58 | 33.61 | 34.44 |
| H9  |                  | 35.41 | 35.24 | 29.71 | 27.58 | 33.7  | 32.61 | 31.36 | 34.98 | 34.13 | 33.97 | 34.87 | 34.73 |
| H10 | <i>STAT5</i>     | 22.95 | 24.68 | 24.22 | 23.66 | 23.29 | 22.48 | 22.86 | 23.27 | 23.23 | 24.13 | 24.45 | 23.55 |
| H11 |                  | 22.98 | 24.68 | 24.18 | 23.28 | 23.29 | 22.44 | 22.71 | 23.01 | 23.08 | 23.98 | 24.56 | 23.53 |
| H12 |                  | 22.97 | 24.72 | 24.19 | 23.63 | 23.32 | 22.45 | 22.85 | 23.01 | 23.08 | 23.8  | 24.35 | 23.59 |
|     |                  |       |       |       |       |       |       |       |       |       |       |       |       |
| A1  | <i>Caspase-9</i> | 28.7  | 28.68 | 28.54 | 28.68 | 28.72 | 28    | 28.4  | 29.18 | 29.1  | 28.81 | 29.59 | 28.76 |
| A2  |                  | 28.8  | 28.51 | 28.76 | 28.86 | 28.71 | 28.15 | 28.83 | 28.89 | 28.86 | 29.31 | 28.95 | 29.06 |

|     |                 |       |       |       |       |       |       |       |       |       |       |       |       |
|-----|-----------------|-------|-------|-------|-------|-------|-------|-------|-------|-------|-------|-------|-------|
| A3  |                 | 28.43 | 28.74 | 28.99 | 29.4  | 28.58 | 28.3  | 29.32 | 29.76 | 29.26 | 29.2  | 29.26 | 29.12 |
| A4  | <i>Cyclin-A</i> | 20.72 | 21.12 | 20.58 | 20.89 | 20.79 | 21    | 20.98 | 20.48 | 20.33 | 20.6  | 20.42 | 20.49 |
| A5  |                 | 20.97 | 21.46 | 20.58 | 20.9  | 20.82 | 21.12 | 21.02 | 20.27 | 20.47 | 20.54 | 20.5  | 20.83 |
| A6  |                 | 20.96 | 21.39 | 20.61 | 21.03 | 20.74 | 21.12 | 20.95 | 20.3  | 20.32 | 20.67 | 20.38 | 20.76 |
| A7  | <i>SOX6</i>     | 26.51 | 24.43 | 23.48 | 25.57 | 25.79 | 26.92 | 25.24 | 25.34 | 27.11 | 26.21 | 25.1  | 27.24 |
| A8  |                 | 26.16 | 24.02 | 23.42 | 25.4  | 25.67 | 27.36 | 24.91 | 25.41 | 27.16 | 25.84 | 25.18 | 26.99 |
| A9  |                 | 26.45 | 24.07 | 23.15 | 25.39 | 25.56 | 27.15 | 25.06 | 25.39 | 27.1  | 25.93 | 25.2  | 27.07 |
| A10 | <i>TNF</i>      | 35.17 | 37.41 | 35.37 | 37.29 | 37.5  | 35.77 | 37.49 | 35.34 | 30.66 | 37.48 | 37.65 | 35.51 |
| A11 |                 | 33.76 | 35.77 | 35.34 | 37.64 | 37.7  | 34.12 | 37.01 | 36.78 | 30.08 | 37.66 | 37.71 | 34.76 |
| A12 |                 | 33.62 | 34.95 | 36.69 | 35.57 | 37.72 | 34.51 | 35.29 | 34.73 | 30.04 | 35.88 | 35.89 | 34.97 |
| B1  | <i>NFE4</i>     | 35.29 | 35.08 | 35.94 | 36.82 | 35.66 | 36.77 | 34.44 | 34.4  | 34.89 | 37.22 | 36.02 | 36.77 |
| B2  |                 | 35.11 | 35.22 | 35.87 | 36.93 | 36.09 | 36    | 34.15 | 32.52 | 35.99 | 37.39 | 37.12 | 35.29 |
| B3  |                 | 35.02 | 35.01 | 35.99 | 36.77 | 36.71 | 36.65 | 35.77 | 34.41 | 36.14 | 37.19 | 36.75 | 37.52 |
| B4  | <i>CDHBP</i>    | 27.92 | 25.59 | 29.81 | 28.27 | 26.75 | 27.86 | 30.88 | 26.79 | 26.86 | 27.61 | 26.65 | 27.7  |
| B5  |                 | 28.13 | 25.5  | 29.89 | 28.8  | 26.92 | 27.74 | 31.31 | 26.97 | 26.8  | 27.56 | 26.77 | 27.38 |
| B6  |                 | 27.87 | 25.21 | 30.02 | 28.46 | 26.82 | 27.81 | 31.22 | 26.91 | 26.67 | 27.4  | 26.8  | 27.55 |
| B7  | <i>AKT</i>      | 24.28 | 24.75 | 24.93 | 24.93 | 23.75 | 23.81 | 23.81 | 24.31 | 24.42 | 24.64 | 24.93 | 24.78 |
| B8  |                 | 24.84 | 25.05 | 25.54 | 25.28 | 24.01 | 24.2  | 23.95 | 24.76 | 25.02 | 25.41 | 25.29 | 25.41 |
| B9  |                 | 25.02 | 25.65 | 25.43 | 25.53 | 24.31 | 24.41 | 24.36 | 24.69 | 25.06 | 25.3  | 25.54 | 25.52 |
| B10 | <i>TFR1</i>     | 17.46 | 17.46 | 16.98 | 17.52 | 17.2  | 17.49 | 18.49 | 17.74 | 17.47 | 18.04 | 17.91 | 18.2  |
| B11 |                 | 17.41 | 17.48 | 17.01 | 17.07 | 17.34 | 17.48 | 18.5  | 17.73 | 17.47 | 18.05 | 17.94 | 18.22 |
| B12 |                 | 17.37 | 17.42 | 17.1  | 17.32 | 17.27 | 17.51 | 18.81 | 17.76 | 17.52 | 18.49 | 18.22 | 18.37 |
| C1  | <i>NFE2</i>     | 21.47 | 21.59 | 20.82 | 21.38 | 21.44 | 21.18 | 21.65 | 21.78 | 21.67 | 21.59 | 21.6  | 21.92 |
| C2  |                 | 21.41 | 21.48 | 20.74 | 21.11 | 21.36 | 21.09 | 21.43 | 21.73 | 21.56 | 21.59 | 21.49 | 21.86 |
| C3  |                 | 21.54 | 21.46 | 20.7  | 21.12 | 21.44 | 21.12 | 21.45 | 21.75 | 21.57 | 21.59 | 21.51 | 21.89 |
| C4  | <i>SMAD2</i>    | 22.91 | 23.16 | 23.06 | 22.95 | 22.72 | 22.72 | 23.38 | 22.72 | 23.11 | 22.93 | 22.95 | 23.09 |
| C5  |                 | 22.9  | 23.2  | 23.06 | 22.89 | 22.76 | 22.71 | 23.38 | 22.75 | 23.09 | 22.94 | 23    | 23.1  |
| C6  |                 | 22.9  | 23.17 | 23.01 | 22.85 | 22.72 | 22.71 | 23.39 | 22.72 | 23.07 | 22.95 | 22.96 | 23.06 |
| C7  | <i>CDK2</i>     | 23.42 | 23.67 | 23.41 | 23.39 | 23.33 | 23.28 | 23.63 | 23.37 | 23.66 | 23.47 | 23.92 | 23.63 |
| C8  |                 | 23.51 | 23.86 | 23.48 | 23.48 | 23.3  | 23.29 | 23.67 | 23.43 | 23.62 | 23.46 | 23.9  | 23.6  |
| C9  |                 | 23.57 | 23.67 | 23.52 | 23.53 | 23.45 | 23.43 | 23.67 | 23.44 | 23.58 | 23.62 | 23.89 | 23.82 |
| C10 | <i>GDF11</i>    | 27.55 | 31.21 | 29.48 | 28.87 | 27.7  | 26.58 | 28.23 | 27.58 | 27.57 | 29.16 | 29.44 | 29.19 |
| C11 |                 | 27.99 | 30.24 | 29.53 | 28.98 | 27.59 | 26.74 | 27.86 | 27.56 | 27.54 | 29.51 | 29.06 | 29.17 |
| C12 |                 | 27.92 | 31.4  | 30.08 | 29.47 | 27.93 | 27.03 | 28.87 | 27.84 | 27.83 | 29.59 | 30.15 | 29.62 |
| D1  | <i>LYAR</i>     | 22.45 | 23.3  | 23.38 | 22.56 | 21.79 | 22.31 | 22.77 | 22.14 | 21.71 | 22.73 | 21.83 | 23.25 |

|     |                  |       |       |       |       |       |       |       |       |       |       |       |       |
|-----|------------------|-------|-------|-------|-------|-------|-------|-------|-------|-------|-------|-------|-------|
| D2  |                  | 22.07 | 23.06 | 23.08 | 22.22 | 21.9  | 21.99 | 22.06 | 21.87 | 21.37 | 22.58 | 21.58 | 22.7  |
| D3  |                  | 22.05 | 22.98 | 23.02 | 22.23 | 21.86 | 22.02 | 22.05 | 21.91 | 21.4  | 22.49 | 21.62 | 22.77 |
| D4  | <i>Caspase-8</i> | 25.84 | 26.78 | 26.4  | 26.43 | 25.89 | 25.52 | 25.67 | 26.16 | 25.81 | 26.09 | 26.59 | 26.95 |
| D5  |                  | 25.76 | 26.67 | 26.54 | 26.52 | 25.85 | 25.51 | 25.68 | 26.16 | 25.86 | 26.14 | 26.43 | 27    |
| D6  |                  | 25.74 | 26.5  | 26.52 | 26.44 | 25.82 | 25.55 | 25.82 | 26.07 | 25.93 | 26.05 | 26.46 | 26.83 |
| D7  | <i>GDF15</i>     | 34.92 | 32.83 | 32.75 | 32.73 | 33.4  | 34.19 | 36.11 | 34.53 | 35.41 | 34.92 | 37.35 | 35.27 |
| D8  |                  | 37.67 | 33.33 | 32.57 | 35.67 | 34.38 | 33.47 | 35.28 | 36.02 | 33.45 | 35.2  | 34.11 | 34.95 |
| D9  |                  | 36.55 | 33.48 | 32.69 | 36.15 | 34.93 | 34.4  | 33.31 | 34.93 | 35.15 | 33.86 | 35.64 | 35.53 |
| D10 | <i>CD79A</i>     | 33.39 | 34.56 | 33.36 | 34.17 | 33.92 | 34.53 | 32.63 | 33.26 | 32.81 | 34.34 | 33.88 | 34.74 |
| D11 |                  | 31.58 | 35.25 | 33.32 | 34.33 | 32.16 | 34.14 | 33.01 | 32.97 | 31.37 | 34.4  | 32.99 | 34.84 |
| D12 |                  | 33.51 | 34.76 | 34.79 | 34.34 | 33.85 | 34.61 | 34.26 | 34.17 | 33.56 | 34.46 | 35.32 | 34.38 |
| E1  | <i>ZBTB7A</i>    | 25.35 | 25.59 | 24.96 | 25.52 | 25.15 | 25.09 | 25.55 | 25.24 | 25.12 | 25.72 | 25.61 | 26.13 |
| E2  |                  | 25.4  | 25.4  | 25.1  | 24.96 | 25.14 | 24.73 | 24.88 | 25.18 | 25.08 | 25.62 | 25.61 | 25.91 |
| E3  |                  | 25.41 | 25.44 | 25.19 | 25.02 | 24.99 | 24.71 | 24.82 | 24.79 | 25.12 | 25.54 | 25.64 | 25.86 |
| E4  | <i>TRAIL</i>     | 32.53 | 35.97 | 36.36 | 34.94 | 36.66 | 34.33 | 33.57 | 35.37 | 34.92 | 34.58 | 34.97 | 37.64 |
| E5  |                  | 33.66 | 36.45 | 36.62 | 36.89 | 37.24 | 37.75 | 37.76 | 36.13 | 34.91 | 36.14 | 36.59 | 37.53 |
| E6  |                  | 33.76 | 35.85 | 35.54 | 35.79 | 35.25 | 34.88 | 36.6  | 35.13 | 37.88 | 34.99 | 35.18 | 36.11 |
| E7  | <i>KLF3</i>      | 22.9  | 22.59 | 22.16 | 22.63 | 22.75 | 22.89 | 22.75 | 22.69 | 22.77 | 22.67 | 22.86 | 22.78 |
| E8  |                  | 22.87 | 22.51 | 22.17 | 22.64 | 22.75 | 22.95 | 22.77 | 22.72 | 22.81 | 22.71 | 22.84 | 22.77 |
| E9  |                  | 22.87 | 22.68 | 22.16 | 22.63 | 22.78 | 22.89 | 22.77 | 22.68 | 22.78 | 22.69 | 22.88 | 22.79 |
| E10 | <i>SMAD3</i>     | 24.65 | 25.9  | 26.94 | 25.48 | 24.81 | 24.18 | 25.81 | 24.9  | 25.23 | 25.71 | 26.12 | 25.46 |
| E11 |                  | 24.54 | 25.85 | 27.05 | 25.17 | 24.73 | 24.17 | 25.94 | 24.91 | 25.42 | 25.88 | 26.09 | 25.91 |
| E12 |                  | 24.62 | 26.31 | 27.2  | 25.91 | 25.21 | 24.48 | 26.13 | 25.45 | 25.82 | 26    | 26.47 | 26.16 |
| F1  | <i>GAPDH</i>     | 17.47 | 18.29 | 18.17 | 17.49 | 16.82 | 17.21 | 17.45 | 17.05 | 16.81 | 17.77 | 17.43 | 17.77 |
| F2  |                  | 17.48 | 18.43 | 18.22 | 17.69 | 16.91 | 17.17 | 17.49 | 17.03 | 16.88 | 17.65 | 17.1  | 17.78 |
| F3  |                  | 17.46 | 18.38 | 18.17 | 17.67 | 16.91 | 17.14 | 17.47 | 17.03 | 16.9  | 17.72 | 17.13 | 17.75 |

| raw data |             | After erythroid differentiation |          |          |          |          |          |          |          |          |          |          |            |
|----------|-------------|---------------------------------|----------|----------|----------|----------|----------|----------|----------|----------|----------|----------|------------|
|          |             | WT                              | -88      | CD6      | CD17     | CD19     | CD26     | IVS-I-1  | IVS-I-5  | CD39     | CD7172   | IVS-II-1 | IVS-II-745 |
| well     | Gene        | Ct value                        | Ct value | Ct value | Ct value | Ct value | Ct value | Ct value | Ct value | Ct value | Ct value | Ct value | Ct value   |
| A1       | <i>HBA</i>  | 29.17                           | 20.91    | 21.74    | 27.18    | 24.47    | 27.51    | 26.39    | 18.95    | 25       | 26.62    | 19.95    | 27.59      |
| A2       |             | 28.96                           | 20.84    | 21.88    | 27.3     | 24.12    | 27.21    | 26.49    | 19.13    | 24.76    | 26.64    | 19.98    | 28.75      |
| A3       |             | 28.82                           | 20.85    | 21.78    | 26.91    | 24.43    | 27.14    | 26.11    | 19.04    | 24.94    | 26.94    | 20.23    | 27.93      |
| A4       | <i>KLF1</i> | 35.44                           | 27.81    | 31.72    | 33.86    | 31.41    | 32.7     | 34.96    | 28.64    | 35.77    | 34.52    | 32.55    | 35.6       |
| A5       |             | 34.22                           | 28.02    | 31.73    | 35.03    | 31.87    | 33.06    | 35.05    | 29.64    | 34.26    | 34.43    | 31.26    | 36.29      |

|     |              |       |       |       |       |       |       |       |       |       |       |       |       |
|-----|--------------|-------|-------|-------|-------|-------|-------|-------|-------|-------|-------|-------|-------|
| A6  |              | 35.08 | 26.06 | 31.52 | 33.83 | 31.27 | 33.67 | 35.27 | 29.53 | 36.26 | 34.31 | 31.69 | 34.06 |
| A7  | <i>AHSP</i>  | -     | 35.52 | 34.13 | 38.12 | 35.57 | 35.66 | 35.56 | 31.78 | 35.23 | 35.47 | 32.15 | 35.4  |
| A8  |              | -     | 34.84 | 35.38 | 38.05 | 35.33 | 35.93 | 35.55 | 31.62 | 35.79 | 35.54 | 32.83 | 35.32 |
| A9  |              | -     | 34.89 | 34.27 | 37.87 | 35.27 | 35.8  | 35.59 | 31.59 | 35.56 | 35.37 | 33.73 | 35.67 |
| A10 | <i>PRDX2</i> | 34.38 | 23.58 | 26.46 | 32.27 | 29.22 | 31.94 | 30.78 | 21.52 | 29.22 | 32.13 | 24.37 | 33.42 |
| A11 |              | 34.15 | 23.46 | 25.73 | 31.25 | 29.1  | 32.25 | 30.39 | 21.49 | 29.06 | 30.3  | 23.83 | 32.9  |
| A12 |              | 34.36 | 23.56 | 25.79 | 31.92 | 28.72 | 33.25 | 30.39 | 21.53 | 29.11 | 30.98 | 23.89 | 30.53 |
| B1  | <i>HBB</i>   | 19.92 | 15.75 | 17.17 | 20.38 | 19.42 | 19.49 | 19.27 | 16.89 | 22.76 | 23.55 | 19.33 | 21.75 |
| B2  |              | 19.94 | 15.82 | 17.13 | 20.46 | 19.39 | 19.42 | 19.3  | 16.87 | 22.78 | 23.5  | 19.21 | 21.74 |
| B3  |              | 19.9  | 15.89 | 17.16 | 20.48 | 19.37 | 19.43 | 19.57 | 16.88 | 22.74 | 23.55 | 19.36 | 21.74 |
| B4  | <i>EPOR</i>  | -     | 32.66 | 36.91 | -     | 35.23 | -     | 36.97 | 31.49 | 35.25 | -     | 33.02 | 35.33 |
| B5  |              | -     | 31.58 | 36.43 | -     | 35.23 | -     | 37.59 | 30.63 | 35.57 | -     | 34.42 | 35.43 |
| B6  |              | -     | 31.68 | 36.8  | -     | 35.37 | -     | 37.78 | 30.57 | 34.99 | -     | 34.26 | 35.29 |
| B7  | <i>E2F2</i>  | -     | 31.46 | 33.67 | -     | 35.39 | -     | 35.29 | 30    | 34.87 | 35.51 | 32.42 | 35.6  |
| B8  |              | -     | 30.18 | 32.89 | -     | 34.61 | -     | 35.38 | 29.86 | 35.64 | 34.98 | 32.29 | 35.59 |
| B9  |              | -     | 31.63 | 33.31 | -     | 34.55 | -     | 35.3  | 29.66 | 35.32 | 35.31 | 32.37 | 35.48 |
| B10 | <i>TWSG1</i> | -     | 33    | 35.77 | 38.01 | 34.97 | 36.21 | -     | 31.61 | 35.36 | -     | 33.93 | -     |
| B11 |              | -     | 33.34 | 35.26 | 37    | 34.26 | 35.64 | -     | 32.95 | 35.35 | -     | 34.59 | -     |
| B12 |              |       | 32.62 | 36.12 | 37.77 | 34.77 | 35.23 | -     | 33.52 | 36.05 | -     | 33.77 | -     |
| C1  | <i>HBG</i>   | 24.63 | 19.94 | 18.46 | 26.45 | 25.18 | 21.78 | 20.99 | 17.33 | 17.19 | 17.83 | 17.79 | 19.43 |
| C2  |              | 24.81 | 20.04 | 18.57 | 26.49 | 24.96 | 21.73 | 21.35 | 17.14 | 17.17 | 17.89 | 17.88 | 19.69 |
| C3  |              | 24.74 | 20.08 | 18.54 | 26.41 | 25.03 | 21.7  | 21.02 | 17.13 | 17.17 | 17.91 | 17.89 | 19.59 |
| C4  | <i>GF1B</i>  | -     | 35.55 | 34.98 | -     | -     | -     | -     | 31.61 | -     | -     | 35.12 | -     |
| C5  |              | -     | 35.25 | 35.48 | -     | -     | -     | -     | 32.24 | -     | -     | 34.84 | -     |
| C6  |              | -     | 34.99 | 35.82 | -     | -     | -     | -     | 31.91 | -     | -     | 35.13 | -     |
| C7  | <i>TALI</i>  | -     | 34.54 | -     | -     | -     | -     | -     | 34.63 | -     | -     | 35.36 | -     |
| C8  |              | -     | 35.15 | -     | -     | -     | -     | -     | 35.38 | -     | -     | 35.4  | -     |
| C9  |              | -     | 34.75 | -     | -     | -     | -     | -     | 35.37 | -     | -     | 35.33 | -     |
| C10 | <i>LYZ</i>   | 38.15 | 34.92 | -     | 36.98 | -     | -     | -     | -     | -     | -     | -     | -     |
| C11 |              | 37.95 | 35.75 | -     | 37.33 | -     | -     | -     | -     | -     | -     | -     | -     |
| C12 |              | 38.34 | 35.31 | -     | 36.93 | -     | -     | -     | -     | -     | -     | -     | -     |
| D1  | <i>GAPDH</i> | 30.89 | 23.51 | 24.79 | 29.23 | 26.76 | 28.53 | 28.11 | 22.48 | 25.51 | 26.58 | 22.65 | 29.69 |
| D2  |              | 30.58 | 23.47 | 24.87 | 28.56 | 26.88 | 28.78 | 27.94 | 22.63 | 25.68 | 26.66 | 22.43 | 29.07 |
| D3  |              | 30.7  | 23.45 | 24.79 | 28.63 | 26.82 | 28.52 | 27.9  | 22.4  | 25.59 | 26.59 | 22.57 | 28.97 |
| D4  | <i>C-MYB</i> | 35.31 | 31.44 | 33.67 | 35.62 | 33.45 | 34.51 | 32.62 | 30.23 | 33.47 | 34.23 | 32.38 | 33.8  |

|     |                  |       |       |       |       |       |       |       |       |       |       |       |       |
|-----|------------------|-------|-------|-------|-------|-------|-------|-------|-------|-------|-------|-------|-------|
| D5  |                  | 36.82 | 31.03 | 34.42 | 35.05 | 35.22 | 34.27 | 33.88 | 29.96 | 34.18 | 34.3  | 31.87 | 33.78 |
| D6  |                  | 37.65 | 30.79 | 32.81 | 35.15 | 35.17 | 34.98 | 34.31 | 29.81 | 33.86 | 33.66 | 31.88 | 33.86 |
| D7  | <i>BCL-xL</i>    | 33.93 | 30.1  | 33.19 | -     | 34.77 | -     | -     | 28.71 | 33    | -     | 31.95 | 34.44 |
| D8  |                  | 34.46 | 30.11 | 33.32 | -     | 34.63 | -     | -     | 28.22 | 34.49 | -     | 31.08 | 34.5  |
| D9  |                  | 35.43 | 29.61 | 32.41 | -     | 34.32 | -     | -     | 28.58 | 33.88 | -     | 32.37 | 34.42 |
| D10 | <i>TUBB6</i>     | 38.22 | 33.64 | 34.64 | -     | -     | 38.72 | -     | 32.58 | -     | 36.14 | 33.31 | -     |
| D11 |                  | 37.6  | 34.37 | 34.18 | -     | -     | 39.43 | -     | 34.11 | -     | 35.92 | 34.35 | -     |
| D12 |                  | 37.1  | 33.79 | 36.15 | -     | -     | 39.32 | -     | 33.62 | -     | 36.01 | 35.43 | -     |
| E1  | <i>BCL11A</i>    | 35.8  | 28.53 | 34.12 | 35.34 | 35.45 | 33.71 | 34.64 | 30.52 | -     | -     | 32.21 | 35.2  |
| E2  |                  | 35.79 | 29.06 | 33.33 | 34.89 | 34.64 | 33.62 | 33.57 | 30.51 | -     | -     | 32.82 | 35.58 |
| E3  |                  | 35.58 | 29.42 | 34.93 | 35.56 | 35.32 | 33.95 | 33.99 | 29.87 | -     | -     | 31.68 | 35.44 |
| E4  | <i>Band3</i>     | 35.02 | 27.95 | 33.29 | 35.03 | 34.16 | 33.87 | 35.83 | 27.16 | 35.93 | 35.75 | 29.92 | 36.14 |
| E5  |                  | 34.9  | 27.94 | 31.61 | 35.93 | 34.55 | 33.91 | 34.49 | 27.33 | 35.65 | 37.64 | 29.64 | 35.29 |
| E6  |                  | 33.52 | 27.98 | 31.04 | 35.88 | 34.26 | 33.95 | 34.21 | 27.2  | 33.64 | 36.89 | 29.9  | 34.46 |
| E7  | <i>HSP70</i>     | 33.79 | 28.9  | 30.75 | 34.82 | 33.94 | 34.72 | 34.95 | 27.69 | 33.34 | 34.59 | 28.51 | 35.01 |
| E8  |                  | 33.89 | 28.95 | 30.12 | 36.49 | 33.39 | 34.36 | 34.43 | 27.71 | 32.59 | 34.18 | 28.54 | 35.66 |
| E9  |                  | 36.18 | 29.17 | 30.18 | 34.77 | 34.82 | 35.83 | 36.66 | 27.67 | 33.93 | 33.38 | 28.78 | 36.03 |
| E10 | <i>UCHL1</i>     | -     | -     | -     | 36.55 | -     | 37.6  | -     | -     | -     | -     | 36.53 | 35.74 |
| E11 |                  | -     | -     | -     | 36.64 | -     | 36.82 | -     | -     | -     | -     | 37.01 | 35.8  |
| E12 |                  | -     | -     | -     | 36.89 | -     | 36.11 | -     | -     | -     | -     | 35.94 | 35.88 |
| F1  | <i>GATA1</i>     | -     | 31.65 | 35.06 | 35.72 | 35.78 | -     | 35.12 | 30.03 | 35.83 | 35.61 | 33.6  | -     |
| F2  |                  | -     | 33.1  | 34.83 | 35.25 | 36.44 | -     | 35.61 | 30.08 | 35.38 | 37.56 | 33.7  | -     |
| F3  |                  | -     | 31.57 | 34.37 | 35.57 | 35.98 | -     | 34.99 | 30.15 | 35.72 | 34.91 | 34.82 | -     |
| F4  | <i>Band4.1</i>   | 35.63 | 27.91 | 30.92 | 35.05 | 33.91 | 33.34 | 32.61 | 27.63 | 32.97 | 32.66 | 29.24 | 35.17 |
| F5  |                  | 35.75 | 27.94 | 30.33 | 35.74 | 33.91 | 32.16 | 34.84 | 27.66 | 32.24 | 32.84 | 29.77 | 33.33 |
| F6  |                  | 36.18 | 27.94 | 30.03 | 33.91 | 33.51 | 32.55 | 33.5  | 27.76 | 31.97 | 32.55 | 29.54 | 36.3  |
| F7  | <i>Caspase-3</i> | 34.94 | 28.76 | 31.27 | 34.44 | 33.6  | 33.84 | 34.21 | 28.1  | 33.56 | 33.25 | 29.4  | 35.23 |
| F8  |                  | 35.2  | 28.7  | 30.8  | 33.95 | 33.54 | 34.42 | 34.33 | 27.97 | 33.27 | 34.16 | 29.46 | 35.18 |
| F9  |                  | 35.33 | 28.55 | 31.97 | 34.52 | 33.31 | 35.2  | 33.91 | 27.83 | 33.58 | 32.94 | 29.69 | 34.39 |
| F10 | <i>SMAD1</i>     | 35.98 | 35.69 | 36.27 | -     | 36.45 | 36.54 | -     | -     | 36.01 | 36.79 | -     | 36.9  |
| F11 |                  | 36.22 | 36.61 | 36.52 | -     | 36.92 | 37.29 | -     | -     | 37.39 | 36.74 | -     | 34.34 |
| F12 |                  | 36.57 | 36.48 | 36.58 | -     | 36.78 | 35.86 | -     | -     | 36.89 | 36.82 | -     | 37.36 |
| G1  | <i>GATA2</i>     | 37.21 | 31.52 | 35.25 | 35.13 | 36.12 | 35.57 | 34.12 | 33.04 | -     | 36.94 | 34.76 | -     |
| G2  |                  | 37.28 | 32.65 | 35.27 | 35.87 | 35.71 | 35.43 | 34.31 | 33.01 | -     | 36.93 | 34.88 | -     |
| G3  |                  | 37.11 | 32.36 | 36.19 | 35.45 | 35.89 | 34.92 | 34.25 | 32.76 | -     | 34.49 | 32.85 | -     |

|     |                  |       |       |       |       |       |       |       |       |       |       |       |       |
|-----|------------------|-------|-------|-------|-------|-------|-------|-------|-------|-------|-------|-------|-------|
| G4  | <i>Ank1</i>      | 32.75 | 26.09 | 28.71 | 34.47 | 31.27 | 32.21 | 33.84 | 21.13 | 25.88 | 30.87 | 27.42 | 29.82 |
| G5  |                  | 32.95 | 26.1  | 28.6  | 32.73 | 30.86 | 31.26 | 33.25 | 21    | 25.8  | 30.25 | 27.55 | 30.07 |
| G6  |                  | 31.95 | 26    | 28.53 | 31.53 | 31.97 | 31.28 | 33.5  | 21.28 | 24.62 | 28.59 | 27.12 | 30.33 |
| G7  | <i>JAK2</i>      | 33.78 | 27.78 | 28.48 | 32.11 | 31.11 | 30.95 | 33.26 | 27.38 | 30.23 | 32.46 | 27.95 | 33.72 |
| G8  |                  | 34.15 | 27.78 | 28.13 | 30.93 | 32.11 | 32.7  | 32.82 | 26.93 | 30.3  | 32.15 | 27.82 | 35.1  |
| G9  |                  | 34.28 | 28.13 | 28.85 | 32.5  | 32.39 | 31.46 | 32.38 | 27.58 | 29.72 | 30.14 | 27.9  | 35.1  |
| G10 | <i>TGFB3</i>     | -     | -     | -     | -     | -     | -     | -     | -     | -     | 35.33 | -     | -     |
| G11 |                  | -     | -     | -     | -     | -     | -     | -     | -     | -     | 35.04 | -     | -     |
| G12 |                  | -     | -     | -     | -     | -     | -     | -     | -     | -     | 34.96 | -     | -     |
| H1  | <i>GYP A</i>     | 28.04 | 21.89 | 23.14 | 26.66 | 26.25 | 25.97 | 25.69 | 20.64 | 21.52 | 21.44 | 22.56 | 26.53 |
| H2  |                  | 28.13 | 22.1  | 23.12 | 26.54 | 25.93 | 25.96 | 25.75 | 20.72 | 21.48 | 21.51 | 22.52 | 26.45 |
| H3  |                  | 27.87 | 22.11 | 23.1  | 26.65 | 25.84 | 25.91 | 25.67 | 20.38 | 21.52 | 21.57 | 22.54 | 26.42 |
| H4  | <i>SPTA1</i>     | 34.02 | 26.68 | 28.87 | 34.82 | 32.72 | 34.52 | 34.58 | 25.76 | 34.32 | 34.8  | 27.19 | -     |
| H5  |                  | 34.04 | 26.51 | 29.91 | 33.54 | 32.5  | 34.5  | 35.41 | 25.72 | 32.52 | 34.37 | 27.38 | -     |
| H6  |                  | 33.97 | 26.61 | 29.57 | 32.84 | 32.88 | 35.45 | 34.93 | 25.63 | 27.61 | 34.13 | 27.39 | -     |
| H7  | <i>FAS-L</i>     | 35.35 | 27.26 | 27.41 | 29.42 | 34.29 | 32.1  | 34.91 | 32.1  | 29.47 | 28.69 | 35.27 | 34.51 |
| H8  |                  | 34.43 | 26.95 | 27.35 | 30.28 | 37.62 | 31.91 | 33.75 | 29.58 | 33.41 | 29.05 | 34.8  | 34.95 |
| H9  |                  | 34.07 | 26.96 | 27.59 | 31.02 | 31.63 | 32.11 | 32.61 | 28.76 | 31.49 | 28.82 | 35.07 | 35.1  |
| H10 | <i>STAT5</i>     | 37.89 | 33.61 | 34.23 | 33.12 | 34.92 | 34.56 | -     | 33.45 | 34.98 | 35.12 | 35.34 | 35.74 |
| H11 |                  | 37.67 | 32.27 | 33.98 | 33.3  | 34.69 | 35.37 | -     | 34.69 | 35.7  | 35.68 | 34.11 | 34.98 |
| H12 |                  | 36.11 | 31.04 | 34.45 | 30.21 | 35.12 | 34.57 | -     | 32.64 | 36.97 | 35.32 | 36.13 | 35.99 |
|     |                  |       |       |       |       |       |       |       |       |       |       |       |       |
| A1  | <i>Caspase-9</i> | 36.33 | 35.84 | 37.34 | 37.23 | 36.39 | 35.64 | 36.25 | 34.2  | 37.43 | 37.54 | 35.55 | 37.33 |
| A2  |                  | 36.19 | 36.12 | 37.23 | 37.29 | 36.35 | 35.65 | 36.8  | 34.13 | 37.4  | 35.71 | 35.6  | 37.36 |
| A3  |                  | 36.22 | 35.9  | 37.32 | 37.35 | 36.29 | 35.6  | 36.27 | 33.98 | 37.29 | 37.16 | 35.56 | 37.29 |
| A4  | <i>Cyclin-A</i>  | 35.57 | 29.83 | 29.72 | 33.63 | 33.01 | 31.51 | 30.94 | 26.14 | 32.9  | 34.37 | 27.85 | 34.2  |
| A5  |                  | 35.39 | 29.46 | 29.36 | 34.43 | 32.9  | 31.61 | 30.86 | 26.14 | 32.66 | 33.83 | 28.24 | 32.94 |
| A6  |                  | 35.47 | 29.4  | 29.66 | 34.42 | 32.99 | 32.51 | 31.49 | 26.14 | 32.67 | 33.73 | 28.2  | 35.01 |
| A7  | <i>SOX6</i>      | 37.47 | 28.67 | 32.6  | 34.62 | 36.44 | 32.42 | 34.47 | 27.93 | 34.64 | 34.77 | 30.96 | 34.86 |
| A8  |                  | 35.16 | 28.67 | 31.52 | 32.74 | 35.04 | 32.38 | 36.47 | 27.95 | 34.12 | 33.07 | 29.77 | 33.86 |
| A9  |                  | 34.39 | 28.21 | 32.15 | 33.53 | 33.67 | 32.78 | 36.19 | 27.74 | 35.88 | 33.59 | 30.86 | 35.51 |
| A10 | <i>TNF</i>       | 37.13 | 37.13 | 37.39 | 36.77 | 36.58 | 37.11 | 37.34 | 37.35 | 37.35 | 37.36 | 37.42 | 37.63 |
| A11 |                  | 37.23 | 37.33 | 37.31 | 36.93 | 36.53 | 37.31 | 37.3  | 37.34 | 37.38 | 37.39 | 37.3  | 37.22 |
| A12 |                  | 37.21 | 37.45 | 37.12 | 37.52 | 36.49 | 37.2  | 37.29 | 37.4  | 37.34 | 37.35 | 37.35 | 37.3  |
| B1  | <i>NFE4</i>      | 37.34 | 34.92 | 35.14 | 37.54 | 37.43 | 34.63 | 35.12 | 35.29 | 34.93 | 37.35 | 34.39 | 34.73 |

|     |                  |       |       |       |       |       |       |       |       |       |       |       |       |
|-----|------------------|-------|-------|-------|-------|-------|-------|-------|-------|-------|-------|-------|-------|
| B2  |                  | 37.27 | 36.02 | 35.57 | 37.27 | 37.82 | 34.14 | 35.6  | 35.35 | 35.56 | 37.2  | 34.54 | 35.55 |
| B3  |                  | 37.42 | 35.02 | 34.67 | 37.44 | 37.55 | 34.44 | 35.93 | 35.23 | 35.27 | 37.28 | 34.21 | 34.89 |
| B4  | <i>CDHBP</i>     | 32.94 | 28.57 | 28.93 | 31.02 | 30.66 | 28.98 | 29.12 | 28.59 | 30.03 | 29.4  | 27.55 | 29.18 |
| B5  |                  | 33.65 | 28.38 | 28.86 | 30.82 | 30.35 | 31.25 | 30.71 | 28.37 | 30.29 | 28.93 | 27.76 | 29.25 |
| B6  |                  | 32.81 | 28.19 | 28.91 | 30.11 | 31.14 | 30.11 | 29.91 | 28.44 | 31.2  | 29.19 | 27.51 | 28.37 |
| B7  | <i>AKT</i>       | 35.99 | 33.43 | 36.91 | 34.98 | 37.82 | 37.29 | 37.26 | 31.65 | 37.79 | 35.14 | 38.14 | 35.9  |
| B8  |                  | 36.25 | 33.93 | 37.12 | 34.73 | 37.13 | 37.36 | 37.24 | 32.95 | 37.97 | 37.1  | 34.92 | 35.63 |
| B9  |                  | 37.43 | 33.67 | 37.09 | 34.84 | 37.27 | 37.33 | 37.28 | 33.41 | 37.88 | 36.59 | 34.89 | 35.81 |
| B10 | <i>TFR1</i>      | 31.26 | 23.1  | 27.12 | 29.64 | 28.7  | 29.14 | 28.95 | 22.52 | 27.99 | 29.13 | 25.03 | 30.01 |
| B11 |                  | 31.48 | 23.04 | 26.99 | 29.76 | 28.75 | 28.88 | 29.55 | 22.59 | 28.68 | 29.2  | 25.45 | 29.82 |
| B12 |                  | 31.53 | 23.39 | 27.6  | 30.67 | 29.2  | 29.59 | 29.63 | 22.78 | 28.62 | 30.36 | 25.75 | 30.88 |
| C1  | <i>NFE2</i>      | 33.69 | 26.93 | 28.82 | 33.37 | 32.65 | 33.31 | 33.71 | 25.21 | 31.36 | 33.63 | 27.5  | 33.29 |
| C2  |                  | 34.68 | 26.52 | 28.98 | 34.24 | 31.65 | 32.9  | 32.98 | 25.42 | 32.11 | 32.98 | 27.52 | 34.63 |
| C3  |                  | 34.44 | 26.84 | 29.1  | 33.29 | 33.62 | 33.66 | 33.73 | 25.37 | 33.32 | 33.5  | 27.33 | 33.76 |
| C4  | <i>SMAD2</i>     | 35.58 | 28.55 | 30.8  | 34.38 | 32.87 | 35.44 | 32.39 | 28.43 | 33.67 | 35.5  | 29.47 | 35.51 |
| C5  |                  | 35.53 | 28.65 | 31.36 | 35.17 | 34.18 | 34.83 | 33.8  | 28.5  | 35.35 | 35.55 | 29.45 | 35.57 |
| C6  |                  | 35.51 | 28.7  | 31.03 | 35.63 | 33.56 | 35.4  | 33.59 | 28.37 | 33.98 | 33.92 | 29.26 | 34.84 |
| C7  | <i>CDK2</i>      | 35.32 | 34.9  | 36.43 | 37.54 | 37.78 | 36.13 | 35.04 | 31.4  | 36.88 | 35.89 | 35.25 | 34.34 |
| C8  |                  | 34.76 | 35.41 | 35.28 | 34.9  | 36.76 | 36.14 | 36.17 | 31.15 | 37.53 | 35.34 | 34.3  | 33    |
| C9  |                  | 35.3  | 37.73 | 36.71 | 37.67 | 35.48 | 37.19 | 36.7  | 31.49 | 35.13 | 34.67 | 34.87 | 36.27 |
| C10 | <i>GDF11</i>     | 37.7  | 35.89 | 34.59 | 35.67 | 37.64 | 37.58 | 34.7  | 37.02 | 33.51 | 34.15 | 32.74 | 35.58 |
| C11 |                  | 37.31 | 35.88 | 32.89 | 35.44 | 37.79 | 37.35 | 33.9  | 37.66 | 35.3  | 35.85 | 33.7  | 34.69 |
| C12 |                  | 37.33 | 35.85 | 35.81 | 33.77 | 35.26 | 35.43 | 35.66 | 34.89 | 34.49 | 34.46 | 34.68 | 33.7  |
| D1  | <i>LYAR</i>      | 35.15 | 30.83 | 31.11 | 33.27 | 33.95 | 33.56 | 31.7  | 28.73 | 32.82 | 33.33 | 29.74 | 32.65 |
| D2  |                  | 34.75 | 30.34 | 31.48 | 33.6  | 34.23 | 32.52 | 31.45 | 28.72 | 33.33 | 32.33 | 29.45 | 32.64 |
| D3  |                  | 33.65 | 29.96 | 30.12 | 33.38 | 33.69 | 33.59 | 32.46 | 28.15 | 32.35 | 32.86 | 29.9  | 33.56 |
| D4  | <i>Caspase-8</i> | 36.39 | 34.2  | 35.11 | 35.01 | 35.08 | 34.87 | 34.8  | 34.2  | 36.62 | 32.84 | 33.34 | 35.16 |
| D5  |                  | 36.23 | 32.8  | 35.32 | 37.63 | 34.57 | 34.59 | 35.07 | 33.3  | 34.58 | 34.91 | 32.51 | 35.58 |
| D6  |                  | 36.37 | 33.45 | 37.32 | 34.9  | 34.26 | 33.9  | 34.65 | 34.28 | 34.45 | 35.55 | 33.31 | 37.01 |
| D7  | <i>GDF15</i>     | 36.93 | 37.45 | 36.02 | 35.99 | 36.89 | 37.25 | 37.59 | 35.36 | 36.74 | 37.29 | 37.78 | 37.33 |
| D8  |                  | 37.2  | 37.53 | 34.52 | 35.97 | 36.81 | 35.09 | 37.88 | 37.64 | 37.14 | 37.2  | 37.15 | 37.4  |
| D9  |                  | 37.59 | 37.39 | 36.04 | 36.13 | 36.93 | 37.68 | 37.91 | 37.04 | 36.85 | 37.43 | 37.42 | 37.35 |
| D10 | <i>CD79A</i>     | 37.27 | 35.67 | 37.02 | 37.57 | 36.97 | 37.39 | 35.61 | 37.32 | 37.28 | 37.57 | 35.12 | 34.29 |
| D11 |                  | 37.39 | 35.12 | 37.13 | 37.42 | 37.02 | 37.42 | 36.7  | 37.33 | 37.29 | 37.7  | 35.1  | 34.21 |
| D12 |                  | 37.84 | 36.42 | 37.09 | 34.49 | 37.42 | 37.4  | 37.82 | 37.47 | 37.3  | 38.11 | 35.11 | 34.24 |

|     |               |       |       |       |       |       |       |       |       |       |       |       |       |
|-----|---------------|-------|-------|-------|-------|-------|-------|-------|-------|-------|-------|-------|-------|
| E1  | <i>ZBTB7A</i> | 35.19 | 31.52 | 35.15 | 37.2  | 34.51 | 34.3  | 33.68 | 30.95 | 35.32 | 37.29 | 31.6  | 35.3  |
| E2  |               | 35.11 | 30.94 | 34.21 | 37.13 | 35.16 | 34.43 | 33.76 | 30.03 | 34.9  | 37.5  | 31.04 | 35.29 |
| E3  |               | 35.07 | 32.1  | 33.75 | 37.3  | 34.3  | 34.24 | 33.82 | 30.36 | 34.32 | 37.38 | 31.91 | 35.26 |
| E4  | <i>TRAIL</i>  | 37.87 | 37.35 | 36.94 | 35.78 | 37.34 | 37.53 | 32.15 | 35.77 | 35.16 | 37.71 | 35.96 | 33.88 |
| E5  |               | 37.39 | 36.79 | 36.93 | 35.94 | 37.43 | 37.6  | 34.4  | 35.82 | 35.65 | 37.5  | 36.16 | 35.15 |
| E6  |               | 37.45 | 35.82 | 37.2  | 35.86 | 37.31 | 37.02 | 34.75 | 35.69 | 35.32 | 37.46 | 36.02 | 34.5  |
| E7  | <i>KLF3</i>   | 35.28 | 27.71 | 29.93 | 32.99 | 29.66 | 32.53 | 31.22 | 26.89 | 32.93 | 29.7  | 25.91 | 33.61 |
| E8  |               | 34.66 | 27.62 | 28.63 | 29.15 | 30.62 | 32.99 | 32.6  | 26.59 | 32.34 | 30.88 | 27.78 | 30.06 |
| E9  |               | 33.53 | 27.59 | 29.64 | 33.66 | 30.22 | 29.05 | 30.73 | 26.91 | 30.8  | 29.6  | 27.68 | 27.78 |
| E10 | <i>SMAD3</i>  | 37.55 | 32.34 | 35.04 | 34.65 | 36.12 | 36.3  | 33.42 | 34.95 | 36.58 | 32.69 | 33.72 | 36.88 |
| E11 |               | 37.64 | 33.78 | 36.17 | 34.65 | 35.21 | 34.56 | 33.49 | 34.48 | 34.99 | 33.79 | 33.36 | 36.87 |
| E12 |               | 37.52 | 33.37 | 35.18 | 34.67 | 35.82 | 35.14 | 33.45 | 34.86 | 35.66 | 35.47 | 32.96 | 36.83 |
| F1  | <i>GAPDH</i>  | 29.86 | 22.99 | 24.64 | 27.84 | 26.54 | 28.14 | 27.55 | 22.05 | 25.31 | 26.32 | 22.13 | 28.72 |
| F2  |               | 29.74 | 22.96 | 24.58 | 27.79 | 26.51 | 28    | 27.42 | 22.05 | 25.25 | 26.33 | 22.15 | 28.52 |
| F3  |               | 30.17 | 22.88 | 24.51 | 27.85 | 26.54 | 28.04 | 27.35 | 21.98 | 25.21 | 26.33 | 22.33 | 28.21 |
| F4  | <i>AHSP</i>   | 37.2  |       |       |       |       |       |       |       |       |       |       |       |
| F5  |               | 37.48 |       |       |       |       |       |       |       |       |       |       |       |
| F6  |               | 37.35 |       |       |       |       |       |       |       |       |       |       |       |
| F7  | <i>EPOR</i>   | 36.42 |       |       | 35.56 |       | 35.12 |       |       |       | 37.53 |       |       |
| F8  |               | 36.43 |       |       | 35.76 |       | 35.13 |       |       |       | 37.28 |       |       |
| F9  |               | 36.19 |       |       | 34.91 |       | 35.1  |       |       |       | 37.31 |       |       |
| F10 | <i>E2F2</i>   | 35.09 |       |       | 34.43 |       | 35.45 |       |       |       |       |       |       |
| F11 |               | 34.92 |       |       | 35.14 |       | 35.46 |       |       |       |       |       |       |
| F12 |               | 34.89 |       |       | 35.23 |       | 35.46 |       |       |       |       |       |       |
| G1  | <i>TWSG1</i>  | 37.44 |       |       |       |       |       | 36.67 |       |       | 37.27 |       | 37.28 |
| G2  |               | 37.65 |       |       |       |       |       | 36.64 |       |       | 37.3  |       | 37.31 |
| G3  |               | 37.39 |       |       |       |       |       | 36.59 |       |       | 37.25 |       | 37.39 |
| G4  | <i>GF1B</i>   | 37.53 |       |       | 36.88 | 37.23 | 36.56 | 37.86 |       | 37.1  | 37.19 |       | 34.99 |
| G5  |               | 37.43 |       |       | 37.11 | 37.59 | 36.54 | 37.52 |       | 37.08 | 37.15 |       | 35.18 |
| G6  |               | 37.19 |       |       | 37.5  | 37.64 | 36.51 | 37.93 |       | 37.22 | 37.45 |       | 34.95 |
| G7  | <i>TALI</i>   | 37.69 |       | 35.52 | 36.97 | 37.74 | 37.39 | 37.5  |       | 37.69 | 37.53 |       | 37.34 |
| G8  |               | 37.53 |       | 35.54 | 37.22 | 37.7  | 37.74 | 37.48 |       | 37.77 | 37.27 |       | 37.29 |
| G9  |               | 37.67 |       | 35.51 | 37.5  | 37.34 | 37.58 | 37.61 |       | 37.68 | 37.43 |       | 37.4  |
| G10 | <i>LYZ</i>    |       |       | 37.2  |       | 37.54 | 37.47 | 37.38 | 37.39 | 37.43 | 37.29 | 37.2  | 37.43 |
| G11 |               |       |       | 37.12 |       | 37.92 | 37.44 | 37.39 | 37.28 | 37.39 | 37.37 | 37.18 | 37.3  |

|     |               |       |       |       |       |       |       |       |       |       |       |       |       |
|-----|---------------|-------|-------|-------|-------|-------|-------|-------|-------|-------|-------|-------|-------|
| G12 |               |       |       | 37.1  |       | 37.5  | 37.43 | 37.7  | 37.19 | 37.4  | 37.35 | 37.24 | 37.32 |
| H1  | <i>BCL-xL</i> |       |       |       | 34.33 |       | 34.95 | 34.45 |       |       | 34.79 |       |       |
| H2  |               |       |       |       | 34.42 |       | 34.97 | 34.89 |       |       | 35.7  |       |       |
| H3  |               |       |       |       | 34.47 |       | 34.95 | 35.36 |       |       | 37.01 |       |       |
| H4  | <i>TUBB6</i>  |       |       |       | 35.57 | 37.49 |       | 37.55 |       | 37.54 |       |       | 35.59 |
| H5  |               |       |       |       | 35.54 | 37.76 |       | 37.53 |       | 37.19 |       |       | 35.62 |
| H6  |               |       |       |       | 35.58 | 37.23 |       | 37.55 |       | 37.38 |       |       | 35.5  |
| H7  | <i>BCL11A</i> |       |       |       |       |       |       |       |       | 35.45 | 37.58 |       |       |
| H8  |               |       |       |       |       |       |       |       |       | 35.47 | 35.5  |       |       |
| H9  |               |       |       |       |       |       |       |       |       | 35.45 | 35.98 |       |       |
| H10 | <i>UCHL1</i>  | 35.56 | 37.13 | 37.22 |       | 36.7  |       | 35.21 | 36.92 | 36.24 | 37.75 |       |       |
| H11 |               | 36.69 | 37.32 | 37.57 |       | 35.44 |       | 35.26 | 35.89 | 33.46 | 37.25 |       |       |
| H12 |               | 35.92 | 37.2  | 35.86 |       | 36.75 |       | 35.27 | 36.75 | 36.74 | 37.26 |       |       |
| H13 | <i>GATA1</i>  | 34.79 |       |       |       |       | 35.55 |       |       |       |       |       | 35.89 |
| H14 |               | 35.28 |       |       |       |       | 35.61 |       |       |       |       |       | 35.39 |
| H15 |               | 35.35 |       |       |       |       | 35.49 |       |       |       |       |       | 36.49 |
| H16 | <i>SMAD1</i>  |       |       |       | 37.42 |       |       | 34.53 | 37.13 |       |       | 37.49 |       |
| H17 |               |       |       |       | 37.48 |       |       | 34.59 | 37.43 |       |       | 37.76 |       |
| H18 |               |       |       |       | 37.41 |       |       | 34.54 | 37.34 |       |       | 37.36 |       |
| H19 | <i>GATA2</i>  |       |       |       |       |       |       |       |       | 35.43 |       |       | 35.13 |
| H20 |               |       |       |       |       |       |       |       |       | 35.48 |       |       | 37.21 |
| H21 |               |       |       |       |       |       |       |       |       | 35.46 |       |       | 36.86 |
| H22 | <i>TGFB3</i>  | 36.79 | 37.22 | 35.96 | 36.5  | 37.23 | 37.34 | 37.43 | 37.37 | 37.29 |       | 35.38 | 37.4  |
| H23 |               | 37.43 | 37.39 | 35.74 | 36.52 | 37.19 | 37.2  | 37.56 | 37.35 | 37.4  |       | 35.43 | 37.52 |
| H24 |               | 37.39 | 37.29 | 36.3  | 36.6  | 37.34 | 37.32 | 37.5  | 37.43 | 37.38 |       | 35.4  | 37.45 |
| H25 | <i>SPTA1</i>  |       |       |       |       |       |       |       |       |       |       |       | 35.13 |
| H26 |               |       |       |       |       |       |       |       |       |       |       |       | 33.65 |
| H27 |               |       |       |       |       |       |       |       |       |       |       |       | 34.6  |
| H28 | <i>STAT5</i>  |       |       |       |       |       |       | 34.36 |       |       |       |       |       |
| H29 |               |       |       |       |       |       |       | 31.81 |       |       |       |       |       |
| H30 |               |       |       |       |       |       |       | 34.39 |       |       |       |       |       |
|     |               |       |       |       |       |       |       |       |       |       |       |       |       |

### Logarithm values for qPCR

| logarithm value | Before erythroid differentiation |     |     |      |      |      |         |         |      |        |          |            |
|-----------------|----------------------------------|-----|-----|------|------|------|---------|---------|------|--------|----------|------------|
|                 | WT                               | -88 | CD6 | CD17 | CD19 | CD26 | IVS-I-1 | IVS-I-5 | CD39 | CD7172 | IVS-II-1 | IVS-II-745 |

| Gene         | value  | value  | value | value  | value  | value  | value  | value  | value  | value  | value  | value  |
|--------------|--------|--------|-------|--------|--------|--------|--------|--------|--------|--------|--------|--------|
| <i>HBA</i>   | -0.303 | 1.356  | 2.431 | 1.266  | 0.016  | -1.084 | 1.345  | 0.222  | -0.134 | 1.405  | 1.144  | 1.645  |
|              | 0.3    | 1.599  | 2.743 | 1.259  | 0.113  | -0.883 | 0.652  | 0.444  | 0.323  | 1.53   | 1.005  | 2.054  |
|              | 0.002  | 1.654  | 2.639 | 1.114  | 0.127  | -1.146 | 0.499  | 0.457  | 0.081  | 1.419  | 0.818  | 1.652  |
| <i>KLF1</i>  | 0.007  | 0.196  | 0.98  | 0.328  | -0.333 | -0.275 | -0.051 | -0.501 | -0.483 | 0.092  | -0.55  | 0.423  |
|              | -0.021 | 0.245  | 0.924 | 0.598  | -0.159 | -0.053 | 0.185  | -0.293 | -0.351 | 0.106  | -0.287 | 0.444  |
|              | 0.014  | 0.356  | 1.368 | 0.682  | -0.159 | 0.051  | 0.268  | -0.245 | -0.254 | 0.287  | 0.081  | 0.52   |
| <i>AHSP</i>  | -0.021 | 1      | 1.694 | 0.397  | -0.825 | -1.446 | 0.282  | -0.023 | -0.337 | 0.349  | 1.308  | 0.658  |
|              | -0.042 | 0.661  | 1.312 | 0.439  | -0.894 | -0.795 | 0.531  | 0.005  | -0.178 | 0.481  | 1.412  | 0.679  |
|              | 0.062  | 0.723  | 1.881 | 0.536  | -0.381 | -0.684 | 0.594  | -0.03  | -0.233 | 0.515  | 1.335  | 0.326  |
| <i>PRDX2</i> | -0.065 | 0.894  | 1.054 | 0.756  | -0.106 | -0.756 | 0.404  | 0.044  | -0.007 | 0.672  | 0.238  | 0.129  |
|              | 0.005  | 0.894  | 1.469 | 0.658  | -0.079 | -0.728 | 0.432  | 0.037  | -0.104 | 0.541  | 0.349  | 0.427  |
|              | 0.06   | 0.908  | 1.539 | 0.665  | -0.113 | -0.749 | 0.377  | 0.127  | -0.152 | 0.52   | 0.307  | 0.427  |
| <i>HBB</i>   | 0.104  | 0.883  | 0.39  | 0.446  | -1.026 | -0.809 | -2.685 | -2.47  | -4.046 | -2.382 | -2.858 | -2.786 |
|              | -0.035 | 0.876  | 0.273 | 0.307  | -0.984 | -0.628 | -2.775 | -2.262 | -4.046 | -2.389 | -3.087 | -2.904 |
|              | -0.069 | 0.876  | 0.293 | 0.363  | -0.998 | -0.628 | -2.782 | -2.269 | -4.108 | -2.396 | -3.073 | -2.918 |
| <i>EPOR</i>  | -0.109 | 0.573  | 0.892 | -0.002 | -0.788 | -0.73  | -0.229 | -0.527 | -1.063 | -0.224 | -0.957 | -0.323 |
|              | -0.067 | 0.691  | 1.225 | 0.095  | -0.698 | -0.723 | -0.146 | -0.388 | -1     | -0.127 | -0.977 | -0.129 |
|              | 0.176  | 0.906  | 1.46  | 0.247  | -0.254 | -0.446 | 0.125  | -0.028 | -0.709 | 0.122  | -0.374 | 0.113  |
| <i>E2F2</i>  | 0.072  | 1.751  | 1.828 | 0.816  | -0.171 | -0.37  | 0.132  | -0.229 | -0.619 | 0.767  | -0.062 | 0.633  |
|              | -0.032 | 1.731  | 1.807 | 0.725  | -0.33  | -0.481 | 0.042  | -0.36  | -0.515 | 0.705  | 0      | 0.488  |
|              | -0.039 | 1.661  | 1.571 | 0.691  | -0.358 | -0.363 | 0.028  | -0.416 | -0.605 | 0.705  | -0.049 | 0.488  |
| <i>TWSG1</i> | 0.164  | 0.291  | 0.416 | -0.236 | -0.023 | 0.014  | -0.025 | -0.164 | -0.381 | -0.007 | -0.393 | -0.217 |
|              | 0.157  | 0.298  | 0.277 | -0.062 | -0.051 | 0.069  | 0.12   | -0.213 | -0.049 | 0.007  | -0.379 | -0.224 |
|              | -0.321 | 0.27   | 0.402 | -0.464 | -0.009 | -0.021 | -0.441 | -0.531 | -0.159 | -0.381 | -0.552 | -0.598 |
| <i>HBG</i>   | -0.129 | 1.01   | 2.202 | 3.616  | -0.92  | -1.451 | 1.365  | 0.665  | 5.654  | 2.5    | 3.362  | 4.189  |
|              | 0.051  | 0.947  | 2.133 | 3.547  | -0.913 | -1.472 | 1.289  | 0.95   | 5.654  | 2.5    | 3.369  | 4.279  |
|              | 0.079  | 1.01   | 2.084 | 3.533  | -0.906 | -1.458 | 1.296  | 0.915  | 5.612  | 2.479  | 3.327  | 4.279  |
| <i>GF1B</i>  | -0.014 | 0.488  | 0.73  | -0.018 | 0.097  | -0.524 | -0.217 | -0.557 | -0.573 | -0.365 | -0.488 | -0.756 |
|              | 0.049  | 0.501  | 0.827 | 0.356  | 0.243  | -0.511 | -0.287 | -0.453 | -0.739 | -0.317 | -0.474 | -0.686 |
|              | -0.035 | 0.467  | 0.841 | 0.342  | 0.125  | -0.386 | -0.169 | -0.474 | -0.379 | -0.268 | -0.293 | -0.444 |
| <i>TALI</i>  | 0.044  | 0.913  | 1.363 | 0.642  | -0.337 | 0.33   | 0.506  | -0.173 | -0.702 | 0.677  | -0.381 | 0.314  |
|              | -0.06  | 0.76   | 0.774 | 0.31   | -0.524 | -0.12  | 0.194  | 0.069  | -0.994 | 0.719  | -1.359 | -0.012 |
|              | 0.016  | 0.795  | 1.356 | 0.76   | -0.032 | 0.414  | 0.568  | -0.388 | -0.938 | 0.732  | -0.624 | 0.321  |
| <i>LYZ</i>   | 0.559  | -0.853 | 0.395 | -1.005 | -1.77  | 0.499  | 0.231  | -1.37  | -0.236 | -0.34  | -1.765 | -0.134 |

|                  |        |        |        |        |        |        |        |        |        |        |        |        |
|------------------|--------|--------|--------|--------|--------|--------|--------|--------|--------|--------|--------|--------|
|                  | 0.206  | -0.936 | -0.256 | -0.742 | -2.123 | 1.407  | -0.233 | -1.349 | -0.104 | -0.631 | -1.862 | 0.303  |
|                  | -0.765 | -0.534 | -0.166 | -0.284 | -1.548 | 0.61   | -0.524 | -1.273 | -0.319 | -1.262 | -1.821 | -0.418 |
| <i>C-MYB</i>     | -0.005 | -0.488 | -0.494 | -0.488 | -0.24  | 0.012  | -0.229 | -0.402 | -0.404 | -0.813 | -0.832 | -0.802 |
|                  | -0.012 | -0.543 | -0.342 | -0.474 | -0.226 | 0.06   | -0.208 | -0.416 | -0.404 | -0.786 | -0.86  | -0.753 |
|                  | 0.016  | -0.481 | -0.342 | -0.446 | -0.226 | 0.032  | -0.187 | -0.374 | -0.397 | -0.786 | -0.818 | -0.753 |
| <i>BCL-xL</i>    | 0.014  | 0.98   | 1.077  | 0.432  | -0.152 | -0.254 | 0.046  | -0.446 | -0.608 | 0.134  | -0.307 | -0.049 |
|                  | 0      | 0.869  | 1.07   | 0.411  | -0.159 | -0.102 | -0.023 | -0.446 | -0.594 | 0.134  | -0.55  | 0.028  |
|                  | -0.014 | 0.841  | 1.028  | 0.3    | -0.139 | -0.018 | 0.046  | -0.488 | -0.462 | 0.127  | -0.349 | -0.007 |
| <i>TUBB6</i>     | 0.141  | 0.559  | 0.698  | 0.081  | -0.164 | -1.506 | 0.173  | -0.173 | -0.737 | -0.044 | -0.208 | 0.155  |
|                  | 0.155  | 0.615  | 0.725  | 0.053  | -0.136 | -0.259 | 0.062  | -0.284 | -0.446 | 0.012  | -0.291 | 0.072  |
|                  | -0.296 | -0.016 | 0.282  | 0.039  | -0.628 | -0.03  | -0.166 | -0.541 | -0.896 | -0.314 | -0.541 | -0.178 |
| <i>BCL11A</i>    | -0.146 | 1.007  | 0.467  | 0.293  | 0.014  | 0.002  | -0.072 | -0.113 | -1.523 | -0.414 | -0.418 | -1.518 |
|                  | -0.014 | 0.959  | 0.716  | 0.002  | 0.035  | -0.116 | -0.113 | -0.002 | -1.647 | -0.421 | -0.571 | -1.026 |
|                  | 0.159  | 1      | 0.751  | 0.085  | 0.055  | -0.039 | -0.113 | -0.002 | -1.55  | -0.448 | -0.418 | -1.067 |
| <i>Band3</i>     | 0.007  | 1.846  | 2.512  | 1.583  | -0.381 | -1.571 | 0.947  | -0.016 | -0.185 | 1.375  | 0.483  | 1.192  |
|                  | 0.014  | 1.846  | 2.512  | 1.583  | -0.395 | -1.53  | 0.927  | -0.016 | -0.206 | 1.382  | 0.476  | 1.164  |
|                  | -0.021 | 1.874  | 2.574  | 1.666  | -0.354 | -1.536 | 0.927  | -0.009 | -0.192 | 1.375  | 0.538  | 1.192  |
| <i>HSP70</i>     | 0.014  | 0.037  | 0.245  | -0.032 | -0.152 | -1.488 | -0.162 | -0.21  | -0.226 | -0.032 | -0.266 | -0.194 |
|                  | -0.007 | -0.039 | 0.21   | 0.002  | -0.09  | -0.247 | -0.196 | -0.176 | -0.268 | -0.116 | -0.307 | -0.215 |
|                  | -0.007 | -0.06  | 0.12   | -0.039 | -0.166 | -0.122 | -0.155 | -0.273 | -0.233 | -0.025 | -0.287 | -0.18  |
| <i>UCHL1</i>     | 0.095  | -5.199 | -2.696 | 0.263  | 1.273  | -6.169 | -2.146 | -1.058 | 0.187  | -1.774 | -0.261 | -2.165 |
|                  | 0.372  | -3.175 | -5.531 | 0.125  | 1.301  | -3.764 | -3.054 | -1.682 | 0.374  | -2.114 | -0.635 | -2.463 |
|                  | -0.467 | -4.159 | -3.098 | 0.021  | 0.476  | -4.429 | -2.847 | -1.911 | 0.201  | -3.154 | -0.906 | -2.636 |
| <i>GATA1</i>     | -0.012 | 0.524  | 0.85   | 0.358  | -0.122 | 0.226  | 0.159  | -0.589 | -0.689 | -0.127 | -0.451 | -0.462 |
|                  | -0.005 | 0.725  | 0.823  | 0.199  | -0.06  | 0.282  | 0.159  | -0.582 | -0.682 | 0.053  | -0.471 | -0.247 |
|                  | 0.016  | 0.608  | 0.85   | 0.296  | -0.046 | 0.254  | 0.166  | -0.561 | -0.702 | 0.095  | -0.464 | -0.261 |
| <i>Band4.1</i>   | 0      | 0.91   | 1.042  | 0.481  | -0.173 | -0.032 | 0.06   | -0.446 | -0.545 | 0.217  | -0.46  | 0.021  |
|                  | 0.007  | 0.917  | 1.021  | 0.481  | -0.146 | -0.032 | 0.046  | -0.467 | -0.545 | 0.21   | -0.418 | 0.028  |
|                  | -0.007 | 0.917  | 1.07   | 0.474  | -0.152 | -0.039 | 0.074  | -0.432 | -0.524 | 0.335  | -0.39  | 0.007  |
| <i>Caspase-3</i> | -0.102 | 0.032  | 0.088  | -0.328 | -0.608 | -0.072 | -0.243 | -0.27  | -0.709 | -0.363 | -0.665 | -0.386 |
|                  | 0.037  | 0.053  | 0.102  | -0.134 | -0.552 | -0.065 | -0.256 | -0.263 | -0.467 | -0.384 | -0.652 | -0.365 |
|                  | 0.065  | 0.046  | 0.074  | -0.231 | -0.559 | -0.079 | -0.284 | -0.277 | -0.619 | -0.384 | -0.617 | -0.386 |
| <i>SMAD1</i>     | 0.062  | -1.904 | -2.625 | 1.818  | -3.119 | -4.281 | -2.9   | -2.969 | -4.073 | -2.916 | -2.47  | -2.738 |
|                  | 0.18   | -2.188 | -3.041 | 1.749  | -2.613 | -3.484 | -3.101 | -3.177 | -5.91  | -2.389 | -2.636 | -2.696 |
|                  | -0.243 | -3.609 | -3.103 | 1.714  | -2.53  | -5.203 | -2.99  | -3.038 | -2.937 | -2.368 | -2.851 | -3.147 |

|                  |        |        |        |        |        |        |        |        |        |        |        |        |
|------------------|--------|--------|--------|--------|--------|--------|--------|--------|--------|--------|--------|--------|
| <i>GATA2</i>     | 0.007  | -0.421 | 0.189  | -0.601 | 0.229  | -0.095 | 0.171  | 0.06   | -0.622 | -0.719 | -0.501 | -0.367 |
|                  | -0.007 | -0.462 | 0.141  | -0.913 | 0.243  | -0.157 | 0.275  | 0.053  | -0.705 | -0.781 | -0.536 | -0.471 |
|                  | 0      | -0.615 | 0.106  | -0.809 | 0.263  | -0.171 | 0.317  | 0.081  | -0.649 | -0.788 | -0.522 | -0.444 |
| <i>Ank1</i>      | -0.037 | 0.839  | 1.061  | 0.451  | -0.072 | -0.007 | 0.127  | -0.247 | -0.333 | 0.367  | -0.289 | 0.15   |
|                  | 0.06   | 0.929  | 1.088  | 0.499  | -0.051 | 0.007  | 0.162  | -0.213 | -0.333 | 0.437  | -0.414 | 0.136  |
|                  | -0.023 | 0.86   | 1.109  | 0.548  | -0.065 | 0.028  | 0.134  | -0.226 | -0.354 | 0.43   | -0.268 | 0.213  |
| <i>JAK2</i>      | -0.067 | 0.885  | 0.996  | 0.393  | -0.143 | -0.259 | 0.021  | -0.132 | -0.446 | 0.275  | -0.111 | 0.106  |
|                  | 0.085  | 0.913  | 0.982  | 0.386  | -0.109 | -0.238 | -0.111 | -0.09  | -0.397 | 0.317  | -0.049 | 0.196  |
|                  | -0.018 | 0.94   | 0.816  | 0.414  | -0.018 | -0.245 | 0.035  | -0.159 | -0.425 | 0.31   | -0.055 | 0.106  |
| <i>TGFB3</i>     | 0.116  | -0.083 | -0.132 | -0.312 | -0.259 | 0.25   | 0.321  | -0.386 | -0.922 | 0.187  | -0.698 | -0.73  |
|                  | 0.012  | 0.042  | -0.042 | -0.208 | -0.148 | 0.284  | 0.377  | -0.317 | -0.804 | -0.139 | -0.802 | -0.675 |
|                  | -0.127 | -0.222 | -0.388 | -0.693 | -0.155 | -0.132 | 0.231  | -0.622 | -1.532 | -0.423 | -1.183 | -1.091 |
| <i>GYPA</i>      | 0.035  | 1.16   | 1.791  | 0.869  | 0.139  | -0.421 | 0.171  | 0.039  | -0.143 | 1.007  | 1.086  | 0.679  |
|                  | -0.021 | 1.174  | 1.77   | 0.827  | 0.194  | -0.531 | 0.289  | 0.081  | -0.393 | 0.786  | 1.093  | 0.658  |
|                  | -0.014 | 1.181  | 1.756  | 0.515  | 0.166  | -0.407 | 0.171  | 0.088  | -0.33  | 0.924  | 0.656  | 0.679  |
| <i>SPTA1</i>     | 0.009  | 0.829  | 0.975  | -0.231 | -0.323 | -0.141 | -0.18  | -0.173 | -0.806 | 0.046  | -0.582 | 0.134  |
|                  | -0.005 | 0.85   | 0.975  | -0.189 | -0.303 | -0.134 | -0.146 | -0.187 | -0.82  | -0.002 | -0.444 | 0.155  |
|                  | -0.005 | 0.864  | 0.947  | -0.016 | -0.261 | -0.155 | -0.159 | -0.173 | -0.626 | -0.141 | -0.215 | 0.134  |
| <i>FAS-L</i>     | -0.042 | 1.992  | 2.941  | 5.444  | 1.463  | 3.496  | 3.859  | 1.675  | 0.002  | 0.009  | 0.504  | 0.132  |
|                  | 0.021  | 0.654  | 4.244  | 4.75   | 1.65   | 2.796  | 1.696  | -0.058 | 0.051  | 0.453  | 0.933  | 0.714  |
|                  | 0.021  | 0.716  | 4.445  | 5.444  | 0.88   | 1.777  | 2.68   | -0.141 | 0.203  | 0.876  | 0.06   | 0.513  |
| <i>STAT5</i>     | 0.012  | -0.61  | -0.395 | -0.485 | -0.55  | 0.152  | -0.074 | -0.67  | -0.887 | -0.95  | -1.363 | -0.384 |
|                  | -0.009 | -0.61  | -0.367 | -0.222 | -0.55  | 0.18   | 0.03   | -0.49  | -0.783 | -0.846 | -1.439 | -0.37  |
|                  | -0.002 | -0.638 | -0.374 | -0.464 | -0.571 | 0.173  | -0.067 | -0.49  | -0.783 | -0.721 | -1.294 | -0.411 |
| <i>Caspase-9</i> | -0.039 | 0.596  | 0.568  | 0.076  | -0.462 | 0.24   | 0.169  | -0.672 | -0.737 | 0.053  | -0.829 | 0.125  |
|                  | -0.109 | 0.714  | 0.416  | -0.049 | -0.455 | 0.136  | -0.129 | -0.471 | -0.571 | -0.293 | -0.386 | -0.083 |
|                  | 0.148  | 0.555  | 0.256  | -0.423 | -0.365 | 0.032  | -0.469 | -1.074 | -0.848 | -0.217 | -0.601 | -0.125 |
| <i>Cyclin-A</i>  | 0.113  | 0.457  | 0.707  | 0.097  | -0.344 | -0.287 | -0.067 | -0.021 | -0.037 | 0.365  | 0.148  | 0.478  |
|                  | -0.06  | 0.222  | 0.707  | 0.09   | -0.365 | -0.37  | -0.095 | 0.125  | -0.134 | 0.407  | 0.092  | 0.243  |
|                  | -0.053 | 0.27   | 0.686  | 0      | -0.31  | -0.37  | -0.046 | 0.104  | -0.03  | 0.317  | 0.176  | 0.291  |
| <i>SOX6</i>      | -0.095 | 1.969  | 2.502  | 0.658  | -0.005 | -0.585 | 0.786  | 0.416  | -0.931 | 0.282  | 0.709  | -0.395 |
|                  | 0.148  | 2.253  | 2.544  | 0.776  | 0.079  | -0.89  | 1.014  | 0.367  | -0.966 | 0.538  | 0.654  | -0.222 |
|                  | -0.053 | 2.218  | 2.731  | 0.783  | 0.155  | -0.744 | 0.91   | 0.381  | -0.924 | 0.476  | 0.64   | -0.277 |
| <i>TNF</i>       | -0.684 | -1.615 | -0.326 | -2.052 | -2.708 | -1.305 | -2.292 | -1.102 | 2.022  | -2.116 | -2.576 | -0.714 |
|                  | 0.293  | -0.478 | -0.305 | -2.294 | -2.847 | -0.162 | -1.959 | -2.1   | 2.424  | -2.241 | -2.618 | -0.194 |

|                  |        |        |        |        |        |        |        |        |        |        |        |        |
|------------------|--------|--------|--------|--------|--------|--------|--------|--------|--------|--------|--------|--------|
|                  | 0.39   | 0.09   | -1.241 | -0.86  | -2.86  | -0.432 | -0.767 | -0.679 | 2.451  | -1.007 | -1.356 | -0.34  |
| <i>NFE4</i>      | -0.104 | 0.663  | -0.058 | -1.063 | -0.769 | -1.335 | 0.485  | 0.213  | -0.247 | -1.273 | -0.783 | -0.924 |
|                  | 0.021  | 0.566  | -0.009 | -1.139 | -1.067 | -0.802 | 0.686  | 1.516  | -1.01  | -1.391 | -1.546 | 0.102  |
|                  | 0.083  | 0.712  | -0.092 | -1.028 | -1.497 | -1.252 | -0.437 | 0.206  | -1.114 | -1.252 | -1.289 | -1.444 |
| <i>CDHBP</i>     | 0.037  | 2.274  | -0.776 | -0.104 | 0.439  | -0.127 | -2.015 | 0.52   | 0.351  | 0.421  | 0.744  | 0.395  |
|                  | -0.109 | 2.336  | -0.832 | -0.471 | 0.321  | -0.044 | -2.313 | 0.395  | 0.393  | 0.455  | 0.661  | 0.617  |
|                  | 0.072  | 2.537  | -0.922 | -0.236 | 0.39   | -0.092 | -2.25  | 0.437  | 0.483  | 0.566  | 0.64   | 0.499  |
| <i>AKT</i>       | 0.3    | 0.596  | 0.347  | -0.049 | 0.259  | 0.421  | 0.626  | -0.021 | -0.217 | 0.219  | -0.323 | 0.159  |
|                  | -0.088 | 0.388  | -0.076 | -0.291 | 0.079  | 0.15   | 0.529  | -0.333 | -0.633 | -0.314 | -0.573 | -0.277 |
|                  | -0.213 | -0.028 | 0      | -0.464 | -0.129 | 0.005  | 0.245  | -0.284 | -0.661 | -0.238 | -0.746 | -0.354 |
| <i>TFR1</i>      | -0.032 | 0.589  | 0.797  | 0.028  | -0.261 | -0.259 | -0.746 | -0.527 | -0.46  | -0.266 | -0.518 | -0.34  |
|                  | 0.002  | 0.575  | 0.776  | 0.34   | -0.358 | -0.252 | -0.753 | -0.52  | -0.46  | -0.273 | -0.538 | -0.354 |
|                  | 0.03   | 0.617  | 0.714  | 0.166  | -0.31  | -0.273 | -0.968 | -0.541 | -0.494 | -0.578 | -0.732 | -0.457 |
| <i>NFE2</i>      | 0.002  | 0.541  | 0.95   | 0.166  | -0.386 | -0.002 | -0.122 | -0.513 | -0.557 | 0.088  | -0.261 | -0.104 |
|                  | 0.044  | 0.617  | 1.005  | 0.354  | -0.33  | 0.06   | 0.03   | -0.478 | -0.481 | 0.088  | -0.185 | -0.062 |
|                  | -0.046 | 0.631  | 1.033  | 0.347  | -0.386 | 0.039  | 0.016  | -0.492 | -0.488 | 0.088  | -0.199 | -0.083 |
| <i>SMAD2</i>     | -0.005 | 0.444  | 0.388  | 0.069  | -0.282 | -0.079 | -0.33  | -0.173 | -0.564 | 0.15   | -0.206 | 0.076  |
|                  | 0.002  | 0.416  | 0.388  | 0.111  | -0.31  | -0.072 | -0.33  | -0.194 | -0.55  | 0.143  | -0.24  | 0.069  |
|                  | 0.002  | 0.437  | 0.423  | 0.139  | -0.282 | -0.072 | -0.337 | -0.173 | -0.536 | 0.136  | -0.213 | 0.097  |
| <i>CDK2</i>      | 0.055  | 0.504  | 0.559  | 0.178  | -0.291 | -0.053 | -0.09  | -0.21  | -0.531 | 0.189  | -0.464 | 0.116  |
|                  | -0.007 | 0.372  | 0.511  | 0.116  | -0.27  | -0.06  | -0.118 | -0.252 | -0.504 | 0.196  | -0.451 | 0.136  |
|                  | -0.049 | 0.504  | 0.483  | 0.081  | -0.374 | -0.157 | -0.118 | -0.259 | -0.476 | 0.085  | -0.444 | -0.016 |
| <i>GDF11</i>     | 0.187  | -1.728 | -0.654 | -0.626 | -0.326 | 0.654  | -0.284 | -0.134 | -0.247 | -0.76  | -1.296 | -0.744 |
|                  | -0.118 | -1.056 | -0.689 | -0.702 | -0.25  | 0.543  | -0.028 | -0.12  | -0.226 | -1.003 | -1.033 | -0.73  |
|                  | -0.069 | -1.86  | -1.07  | -1.042 | -0.485 | 0.342  | -0.728 | -0.314 | -0.427 | -1.058 | -1.788 | -1.042 |
| <i>LYAR</i>      | -0.18  | -0.148 | -0.328 | -0.155 | -0.132 | -0.289 | -0.402 | -0.266 | -0.088 | -0.206 | 0.076  | -0.529 |
|                  | 0.083  | 0.018  | -0.12  | 0.081  | -0.208 | -0.067 | 0.09   | -0.079 | 0.148  | -0.102 | 0.25   | -0.148 |
|                  | 0.097  | 0.074  | -0.079 | 0.074  | -0.18  | -0.088 | 0.097  | -0.106 | 0.127  | -0.039 | 0.222  | -0.196 |
| <i>Caspase-8</i> | -0.042 | -0.072 | 0.067  | -0.349 | -0.485 | -0.025 | 0.076  | -0.564 | -0.441 | -0.046 | -0.735 | -0.605 |
|                  | 0.014  | 0.005  | -0.03  | -0.411 | -0.457 | -0.018 | 0.069  | -0.564 | -0.476 | -0.081 | -0.624 | -0.64  |
|                  | 0.028  | 0.122  | -0.016 | -0.356 | -0.437 | -0.046 | -0.028 | -0.501 | -0.524 | -0.018 | -0.645 | -0.522 |
| <i>GDF15</i>     | 1.012  | 3.082  | 3.013  | 2.632  | 1.657  | 1.312  | 0.187  | 0.982  | 0.252  | 1.181  | -0.846 | 0.975  |
|                  | -0.894 | 2.736  | 3.138  | 0.594  | 0.977  | 1.811  | 0.762  | -0.051 | 1.61   | 0.987  | 1.4    | 1.197  |
|                  | -0.118 | 2.632  | 3.054  | 0.261  | 0.596  | 1.167  | 2.128  | 0.705  | 0.432  | 1.915  | 0.34   | 0.795  |
| <i>CD79A</i>     | -0.39  | -0.58  | 0.127  | -0.829 | -1.167 | -1.386 | 0.136  | -0.601 | -0.409 | -0.88  | -0.903 | -1.121 |

|               |        |        |        |        |        |        |        |        |        |        |        |        |
|---------------|--------|--------|--------|--------|--------|--------|--------|--------|--------|--------|--------|--------|
|               | 0.864  | -1.058 | 0.155  | -0.94  | 0.053  | -1.116 | -0.127 | -0.4   | 0.589  | -0.922 | -0.287 | -1.19  |
|               | -0.474 | -0.719 | -0.864 | -0.947 | -1.118 | -1.442 | -0.994 | -1.231 | -0.929 | -0.963 | -1.902 | -0.871 |
| <i>ZBTB7A</i> | 0.025  | 0.481  | 0.792  | 0.009  | -0.245 | 0      | -0.113 | -0.199 | -0.236 | -0.062 | -0.328 | -0.31  |
|               | -0.009 | 0.612  | 0.695  | 0.397  | -0.238 | 0.25   | 0.351  | -0.157 | -0.208 | 0.007  | -0.328 | -0.157 |
|               | -0.016 | 0.585  | 0.633  | 0.356  | -0.134 | 0.263  | 0.393  | 0.113  | -0.236 | 0.062  | -0.349 | -0.122 |
| <i>TRAIL</i>  | 0.545  | -1.218 | -1.613 | -1.024 | -2.726 | -0.908 | -0.176 | -1.724 | -1.532 | -0.707 | -1.319 | -2.791 |
|               | -0.238 | -1.55  | -1.793 | -2.375 | -3.128 | -3.279 | -3.08  | -2.25  | -1.525 | -1.788 | -2.442 | -2.715 |
|               | -0.307 | -1.134 | -1.044 | -1.613 | -1.749 | -1.289 | -2.276 | -1.557 | -3.584 | -0.991 | -1.465 | -1.731 |
| <i>KLF3</i>   | -0.014 | 0.823  | 0.996  | 0.275  | -0.319 | -0.213 | 0.09   | -0.169 | -0.344 | 0.314  | -0.159 | 0.275  |
|               | 0.007  | 0.878  | 0.989  | 0.268  | -0.319 | -0.254 | 0.076  | -0.189 | -0.372 | 0.287  | -0.146 | 0.282  |
|               | 0.007  | 0.76   | 0.996  | 0.275  | -0.34  | -0.213 | 0.076  | -0.162 | -0.351 | 0.3    | -0.173 | 0.268  |
| <i>SMAD3</i>  | -0.032 | -0.277 | -1.123 | -0.506 | -0.552 | 0.088  | -0.836 | -0.506 | -0.855 | -0.598 | -1.225 | -0.388 |
|               | 0.044  | -0.243 | -1.199 | -0.291 | -0.497 | 0.095  | -0.927 | -0.513 | -0.987 | -0.716 | -1.204 | -0.7   |
|               | -0.012 | -0.561 | -1.303 | -0.804 | -0.829 | -0.12  | -1.058 | -0.887 | -1.264 | -0.799 | -1.467 | -0.873 |

| logarithm value | After erythroid differentiation |        |        |        |        |        |         |         |        |        |          |            |
|-----------------|---------------------------------|--------|--------|--------|--------|--------|---------|---------|--------|--------|----------|------------|
|                 | WT                              | -88    | CD6    | CD17   | CD19   | CD26   | IVS-I-1 | IVS-I-5 | CD39   | CD7172 | IVS-II-1 | IVS-II-745 |
| Gene            | value                           | value  | value  | value  | value  | value  | value   | value   | value  | value  | value    | value      |
| <i>HBA</i>      | -0.129                          | 0.573  | 0.927  | -0.079 | 0.423  | -0.444 | -0.102  | 1.257   | -0.795 | -1.213 | 0.596    | -0.06      |
|                 | 0.016                           | 0.622  | 0.829  | -0.162 | 0.665  | -0.236 | -0.171  | 1.132   | -0.628 | -1.227 | 0.575    | -0.864     |
|                 | 0.113                           | 0.615  | 0.899  | 0.109  | 0.451  | -0.187 | 0.092   | 1.195   | -0.753 | -1.435 | 0.402    | -0.296     |
| <i>KLF1</i>     | -0.365                          | -0.099 | -1.881 | -0.598 | -0.277 | 0.069  | -1.932  | -1.349  | -4.15  | -2.579 | -4.027   | -1.502     |
|                 | 0.481                           | -0.245 | -1.888 | -1.409 | -0.596 | -0.18  | -1.994  | -2.042  | -3.103 | -2.516 | -3.133   | -1.98      |
|                 | -0.116                          | 1.114  | -1.742 | -0.578 | -0.18  | -0.603 | -2.146  | -1.966  | -4.489 | -2.433 | -3.431   | -0.434     |
| <i>AHSP</i>     | 0.099                           | -3.205 | -1.312 | -1.312 | -0.922 | 0.256  | -0.109  | -1.287  | -1.536 | -0.998 | -1.511   | 0.876      |
|                 | -0.095                          | -2.733 | -2.179 | -1.264 | -0.756 | 0.069  | -0.102  | -1.176  | -1.925 | -1.047 | -1.982   | 0.931      |
|                 | -0.005                          | -2.768 | -1.409 | -1.139 | -0.714 | 0.159  | -0.129  | -1.155  | -1.765 | -0.929 | -2.606   | 0.689      |
| <i>PRDX2</i>    | -0.058                          | 2.405  | 1.338  | 0.076  | 0.813  | 0.169  | 0.538   | 3.158   | -0.037 | -1.349 | 1.215    | -0.418     |
|                 | 0.102                           | 2.488  | 1.844  | 0.783  | 0.896  | -0.046 | 0.809   | 3.179   | 0.074  | -0.081 | 1.59     | -0.058     |
|                 | -0.044                          | 2.419  | 1.802  | 0.319  | 1.16   | -0.739 | 0.809   | 3.152   | 0.039  | -0.552 | 1.548    | 1.585      |
| <i>HBB</i>      | 0                               | -2.133 | -2.188 | -1.647 | -2.359 | -1.167 | -1.449  | -3.597  | -5.524 | -5.367 | -5.256   | -2.294     |
|                 | -0.014                          | -2.181 | -2.16  | -1.703 | -2.338 | -1.118 | -1.469  | -3.584  | -5.538 | -5.333 | -5.173   | -2.287     |
|                 | 0.014                           | -2.23  | -2.181 | -1.717 | -2.324 | -1.125 | -1.657  | -3.591  | -5.511 | -5.367 | -5.277   | -2.287     |
| <i>EPOR</i>     | -0.051                          | -1.913 | -3.93  | -0.908 | -1.377 | -0.441 | -1.777  | -1.777  | -2.241 | -3.313 | -2.805   | 0.233      |
|                 | -0.058                          | -1.164 | -3.597 | -1.047 | -1.377 | -0.448 | -2.207  | -1.181  | -2.463 | -3.14  | -3.775   | 0.164      |

|               |        |        |        |        |        |        |        |        |        |        |        |        |
|---------------|--------|--------|--------|--------|--------|--------|--------|--------|--------|--------|--------|--------|
|               | 0.109  | -1.234 | -3.854 | -0.457 | -1.474 | -0.427 | -2.338 | -1.139 | -2.061 | -3.161 | -3.664 | 0.261  |
| <i>E2F2</i>   | -0.085 | -2.038 | -2.641 | -1.081 | -2.444 | -1.627 | -1.569 | -1.701 | -2.934 | -2.673 | -3.346 | -0.91  |
|               | 0.032  | -1.151 | -2.1   | -1.573 | -1.904 | -1.634 | -1.631 | -1.603 | -3.468 | -2.306 | -3.255 | -0.903 |
|               | 0.053  | -2.156 | -2.391 | -1.636 | -1.862 | -1.634 | -1.576 | -1.465 | -3.246 | -2.535 | -3.311 | -0.827 |
| <i>TWSG1</i>  | 0.037  | -1.354 | -2.345 | -1.132 | -0.402 | -0.021 | -1.151 | -1.065 | -1.523 | -2.338 | -2.641 | -0.85  |
|               | -0.109 | -1.59  | -1.992 | -0.432 | 0.09   | 0.374  | -1.13  | -1.994 | -1.516 | -2.359 | -3.098 | -0.871 |
|               | 0.072  | -1.091 | -2.588 | -0.966 | -0.263 | 0.658  | -1.095 | -2.389 | -2.001 | -2.324 | -2.53  | -0.927 |
| <i>HBG</i>    | 0.067  | -1.705 | 0.25   | -2.523 | -3.02  | 0.578  | 0.691  | -0.571 | 1.668  | 1.929  | -0.857 | 2.646  |
|               | -0.058 | -1.774 | 0.173  | -2.551 | -2.867 | 0.612  | 0.441  | -0.439 | 1.682  | 1.888  | -0.92  | 2.465  |
|               | -0.009 | -1.802 | 0.194  | -2.495 | -2.916 | 0.633  | 0.67   | -0.432 | 1.682  | 1.874  | -0.927 | 2.535  |
| <i>GF1B</i>   | -0.102 | -3.198 | -1.874 | -1.104 | -2.246 | -0.721 | -2.052 | -1.141 | -3.038 | -2.359 | -3.542 | 0.661  |
|               | -0.032 | -2.99  | -2.22  | -1.264 | -2.495 | -0.707 | -1.816 | -1.578 | -3.024 | -2.331 | -3.348 | 0.529  |
|               | 0.134  | -2.81  | -2.456 | -1.534 | -2.53  | -0.686 | -2.1   | -1.349 | -3.121 | -2.539 | -3.549 | 0.689  |
| <i>TAL1</i>   | -0.042 | -2.327 | -2.243 | -0.996 | -2.428 | -1.125 | -1.631 | -3.064 | -3.276 | -2.424 | -3.537 | -0.797 |
|               | 0.069  | -2.749 | -2.257 | -1.169 | -2.401 | -1.368 | -1.617 | -3.584 | -3.332 | -2.243 | -3.565 | -0.762 |
|               | -0.028 | -2.472 | -2.237 | -1.363 | -2.151 | -1.257 | -1.707 | -3.577 | -3.269 | -2.354 | -3.517 | -0.839 |
| <i>LYZ</i>    | -0.002 | -2.786 | -3.604 | -0.52  | -2.486 | -1.377 | -1.744 | -5.504 | -3.292 | -2.454 | -5.249 | -1.056 |
|               | 0.136  | -3.362 | -3.549 | -0.762 | -2.749 | -1.356 | -1.751 | -5.427 | -3.265 | -2.509 | -5.236 | -0.966 |
|               | -0.134 | -3.057 | -3.535 | -0.485 | -2.458 | -1.349 | -1.966 | -5.365 | -3.272 | -2.495 | -5.277 | -0.98  |
| <i>C-MYB</i>  | 0.89   | -1.451 | -2.068 | -0.654 | -0.527 | -0.021 | 0.855  | -1.287 | -1.391 | -1.213 | -2.745 | 0.91   |
|               | -0.157 | -1.167 | -2.588 | -0.259 | -1.754 | 0.146  | -0.018 | -1.1   | -1.883 | -1.262 | -2.391 | 0.924  |
|               | -0.732 | -1     | -1.472 | -0.328 | -1.719 | -0.347 | -0.317 | -0.996 | -1.661 | -0.818 | -2.398 | 0.869  |
| <i>BCL-xL</i> | 0.469  | -1.899 | -3.112 | -1.816 | -2.819 | -2.084 | -2.167 | -1.61  | -2.442 | -3.175 | -3.824 | -0.91  |
|               | 0.102  | -1.906 | -3.202 | -1.878 | -2.722 | -2.098 | -2.472 | -1.271 | -3.475 | -3.805 | -3.221 | -0.952 |
|               | -0.571 | -1.56  | -2.572 | -1.913 | -2.507 | -2.084 | -2.798 | -1.52  | -3.052 | -4.713 | -4.115 | -0.896 |
| <i>TUBB6</i>  | -0.402 | -2.25  | -2.015 | -0.573 | -2.803 | -2.213 | -2.213 | -2.19  | -3.72  | -1.811 | -2.664 | -0.132 |
|               | 0.028  | -2.756 | -1.696 | -0.552 | -2.99  | -2.706 | -2.2   | -3.251 | -3.477 | -1.659 | -3.385 | -0.152 |
|               | 0.374  | -2.354 | -3.061 | -0.58  | -2.622 | -2.629 | -2.213 | -2.911 | -3.609 | -1.721 | -4.133 | -0.069 |
| <i>BCL11A</i> | -0.053 | -0.037 | -2.983 | -1.063 | -2.516 | -0.069 | -1.148 | -2.091 | -3.6   | -4.334 | -3.23  | -0.663 |
|               | -0.046 | -0.404 | -2.435 | -0.751 | -1.955 | -0.007 | -0.407 | -2.084 | -3.614 | -2.893 | -3.653 | -0.927 |
|               | 0.099  | -0.654 | -3.544 | -1.215 | -2.426 | -0.236 | -0.698 | -1.64  | -3.6   | -3.225 | -2.863 | -0.829 |
| <i>Band3</i>  | -0.374 | -0.497 | -3.269 | -1.71  | -2.484 | -1.042 | -2.835 | -0.624 | -4.561 | -3.731 | -2.505 | -2.176 |
|               | -0.291 | -0.49  | -2.105 | -2.334 | -2.754 | -1.07  | -1.906 | -0.742 | -4.367 | -5.041 | -2.31  | -1.587 |
|               | 0.665  | -0.518 | -1.71  | -2.299 | -2.553 | -1.097 | -1.712 | -0.652 | -2.974 | -4.522 | -2.491 | -1.012 |
| <i>HSP70</i>  | 0.575  | -1.058 | -1.412 | -1.467 | -2.234 | -1.534 | -2.128 | -0.894 | -2.669 | -2.83  | -1.43  | -1.296 |

|                  |        |        |        |        |        |        |        |        |        |        |        |        |
|------------------|--------|--------|--------|--------|--------|--------|--------|--------|--------|--------|--------|--------|
|                  | 0.506  | -1.093 | -0.975 | -2.625 | -1.853 | -1.285 | -1.768 | -0.908 | -2.149 | -2.546 | -1.451 | -1.747 |
|                  | -1.081 | -1.245 | -1.017 | -1.433 | -2.844 | -2.304 | -3.313 | -0.88  | -3.078 | -1.992 | -1.617 | -2.003 |
| <i>UCHL1</i>     | 0.344  | -5.582 | -4.512 | -1.116 | -2.798 | -1.98  | -1.134 | -6.072 | -3.362 | -3.667 | -5.439 | -0.252 |
|                  | -0.439 | -5.714 | -4.755 | -1.178 | -1.925 | -1.439 | -1.169 | -5.358 | -1.435 | -3.32  | -5.772 | -0.293 |
|                  | 0.095  | -5.631 | -3.57  | -1.352 | -2.833 | -0.947 | -1.176 | -5.954 | -3.708 | -3.327 | -5.03  | -0.349 |
| <i>GATA1</i>     | 0.243  | -2.049 | -3.484 | -1.176 | -2.595 | -1.576 | -1.331 | -1.601 | -3.48  | -2.622 | -4.043 | -1.518 |
|                  | -0.097 | -3.054 | -3.325 | -0.85  | -3.052 | -1.617 | -1.67  | -1.636 | -3.168 | -3.974 | -4.113 | -1.171 |
|                  | -0.146 | -1.994 | -3.006 | -1.072 | -2.733 | -1.534 | -1.241 | -1.684 | -3.403 | -2.137 | -4.889 | -1.934 |
| <i>Band4.1</i>   | 0.155  | 0.483  | -0.675 | -0.772 | -1.359 | 0.277  | 0.349  | 0.002  | -1.557 | -0.638 | -1.081 | -0.552 |
|                  | 0.072  | 0.462  | -0.266 | -1.25  | -1.359 | 1.095  | -1.197 | -0.018 | -1.051 | -0.762 | -1.449 | 0.723  |
|                  | -0.226 | 0.462  | -0.058 | 0.018  | -1.081 | 0.825  | -0.268 | -0.088 | -0.864 | -0.561 | -1.289 | -1.335 |
| <i>Caspase-3</i> | 0.15   | -0.589 | -1.4   | -0.832 | -1.627 | -0.552 | -1.243 | -0.806 | -2.449 | -1.53  | -1.675 | -1.077 |
|                  | -0.03  | -0.548 | -1.074 | -0.492 | -1.585 | -0.954 | -1.326 | -0.716 | -2.248 | -2.16  | -1.717 | -1.042 |
|                  | -0.12  | -0.444 | -1.885 | -0.887 | -1.426 | -1.495 | -1.035 | -0.619 | -2.463 | -1.315 | -1.876 | -0.494 |
| <i>SMAD1</i>     | 0.192  | -4.63  | -4.103 | -2.814 | -2.84  | -1.661 | -1.079 | -6.633 | -3.385 | -3.221 | -6.76  | -1.472 |
|                  | 0.025  | -5.268 | -4.277 | -2.856 | -3.165 | -2.181 | -1.121 | -6.841 | -4.341 | -3.186 | -6.948 | 0.303  |
|                  | -0.217 | -5.178 | -4.318 | -2.807 | -3.068 | -1.19  | -1.086 | -6.779 | -3.995 | -3.242 | -6.67  | -1.791 |
| <i>GATA2</i>     | -0.007 | -1.086 | -2.743 | 0.106  | -1.957 | -0.335 | 0.236  | -2.814 | -2.562 | -2.671 | -3.974 | -0.118 |
|                  | -0.055 | -1.869 | -2.756 | -0.407 | -1.673 | -0.238 | 0.104  | -2.793 | -2.597 | -2.664 | -4.057 | -1.56  |
|                  | 0.062  | -1.668 | -3.394 | -0.116 | -1.798 | 0.116  | 0.146  | -2.62  | -2.583 | -0.973 | -2.65  | -1.317 |
| <i>Ank1</i>      | -0.139 | -0.545 | -1.433 | -2.659 | -1.818 | -1.229 | -2.793 | 2.218  | 1.067  | -1.687 | -2.109 | 0.866  |
|                  | -0.277 | -0.552 | -1.356 | -1.453 | -1.534 | -0.571 | -2.384 | 2.308  | 1.123  | -1.257 | -2.2   | 0.693  |
|                  | 0.416  | -0.483 | -1.308 | -0.622 | -2.304 | -0.585 | -2.558 | 2.114  | 1.941  | -0.106 | -1.902 | 0.513  |
| <i>JAK2</i>      | 0.201  | -0.663 | -0.219 | 0.03   | -0.654 | 0.698  | -1.338 | -1.061 | -0.894 | -1.735 | -1.423 | -0.783 |
|                  | -0.055 | -0.663 | 0.023  | 0.848  | -1.347 | -0.515 | -1.033 | -0.749 | -0.943 | -1.52  | -1.333 | -1.74  |
|                  | -0.146 | -0.906 | -0.476 | -0.24  | -1.541 | 0.344  | -0.728 | -1.199 | -0.541 | -0.127 | -1.389 | -1.74  |
| <i>TGFB3</i>     | 0.287  | -4.85  | -2.844 | -0.966 | -2.371 | -1.386 | -1.878 | -5.589 | -3.295 | -0.998 | -4.087 | -1.134 |
|                  | -0.157 | -4.968 | -2.692 | -0.98  | -2.343 | -1.289 | -1.969 | -5.575 | -3.371 | -0.797 | -4.122 | -1.218 |
|                  | -0.129 | -4.898 | -3.08  | -1.035 | -2.447 | -1.372 | -1.927 | -5.631 | -3.357 | -0.742 | -4.101 | -1.169 |
| <i>GYPA</i>      | -0.018 | -0.779 | -0.716 | -0.39  | -1.483 | -0.049 | -0.289 | -0.587 | 0.945  | 1.705  | -1.885 | 0.002  |
|                  | -0.081 | -0.924 | -0.702 | -0.307 | -1.262 | -0.042 | -0.33  | -0.642 | 0.973  | 1.657  | -1.858 | 0.058  |
|                  | 0.099  | -0.931 | -0.689 | -0.384 | -1.199 | -0.007 | -0.275 | -0.407 | 0.945  | 1.615  | -1.871 | 0.079  |
| <i>SPTA1</i>     | -0.007 | 0.058  | -0.531 | -1.89  | -1.811 | -1.818 | -2.294 | 0.021  | -3.771 | -3.399 | -0.938 | -2.329 |
|                  | -0.021 | 0.176  | -1.252 | -1.003 | -1.659 | -1.804 | -2.87  | 0.049  | -2.523 | -3.101 | -1.07  | -1.303 |
|                  | 0.028  | 0.106  | -1.017 | -0.518 | -1.922 | -2.463 | -2.537 | 0.111  | 0.88   | -2.934 | -1.077 | -1.962 |

|                  |        |        |        |        |        |        |        |        |        |        |        |        |
|------------------|--------|--------|--------|--------|--------|--------|--------|--------|--------|--------|--------|--------|
| <i>FAS-L</i>     | -0.508 | 0.076  | 0.901  | 2.274  | -2.479 | 0.28   | -2.103 | -3.953 | 0.012  | 1.257  | -6.118 | -0.952 |
|                  | 0.129  | 0.291  | 0.943  | 1.677  | -4.787 | 0.411  | -1.298 | -2.207 | -2.719 | 1.007  | -5.792 | -1.257 |
|                  | 0.379  | 0.284  | 0.776  | 1.164  | -0.635 | 0.273  | -0.508 | -1.638 | -1.389 | 1.167  | -5.98  | -1.361 |
| <i>STAT5</i>     | -0.462 | -2.518 | -2.019 | 1.516  | -1.109 | 0.381  | -0.291 | -3.082 | -2.001 | -1.393 | -4.36  | 0.002  |
|                  | -0.31  | -1.59  | -1.846 | 1.391  | -0.95  | -0.18  | 1.476  | -3.942 | -2.5   | -1.781 | -3.507 | 0.529  |
|                  | 0.772  | -0.737 | -2.172 | 3.533  | -1.248 | 0.374  | -0.312 | -2.521 | -3.38  | -1.532 | -4.907 | -0.171 |
| <i>Caspase-9</i> | -0.058 | -4.556 | -4.464 | -2.135 | -2.451 | -0.871 | -1.724 | -4.055 | -4.055 | -3.389 | -4.868 | -1.749 |
|                  | 0.039  | -4.75  | -4.388 | -2.176 | -2.424 | -0.878 | -2.105 | -4.006 | -4.034 | -2.121 | -4.903 | -1.77  |
|                  | 0.018  | -4.598 | -4.45  | -2.218 | -2.382 | -0.843 | -1.737 | -3.902 | -3.958 | -3.126 | -4.875 | -1.721 |
| <i>Cyclin-A</i>  | -0.065 | -0.924 | 0.284  | -0.173 | -0.642 | 1.458  | 1.423  | 0.998  | -1.449 | -1.726 | -0.065 | -0.113 |
|                  | 0.06   | -0.668 | 0.534  | -0.728 | -0.566 | 1.389  | 1.479  | 0.998  | -1.282 | -1.352 | -0.335 | 0.76   |
|                  | 0.005  | -0.626 | 0.326  | -0.721 | -0.628 | 0.765  | 1.042  | 0.998  | -1.289 | -1.282 | -0.307 | -0.675 |
| <i>SOX6</i>      | -1.245 | 0.016  | -1.576 | -0.723 | -2.883 | 0.963  | -0.887 | -0.106 | -2.518 | -1.867 | -2.084 | -0.434 |
|                  | 0.356  | 0.016  | -0.827 | 0.58   | -1.913 | 0.991  | -2.274 | -0.12  | -2.158 | -0.689 | -1.259 | 0.259  |
|                  | 0.89   | 0.335  | -1.264 | 0.032  | -0.963 | 0.714  | -2.079 | 0.025  | -3.378 | -1.049 | -2.015 | -0.885 |
| <i>TNF</i>       | 0.042  | -4.797 | -3.845 | -1.162 | -1.929 | -1.236 | -1.825 | -5.584 | -3.346 | -2.611 | -5.511 | -1.303 |
|                  | -0.028 | -4.935 | -3.789 | -1.273 | -1.895 | -1.375 | -1.798 | -5.578 | -3.366 | -2.632 | -5.427 | -1.019 |
|                  | -0.014 | -5.018 | -3.658 | -1.682 | -1.867 | -1.298 | -1.791 | -5.619 | -3.339 | -2.604 | -5.462 | -1.074 |
| <i>NFE4</i>      | 0.002  | -3.158 | -2.179 | -1.59  | -2.412 | 0.589  | -0.18  | -4.05  | -1.562 | -2.498 | -3.304 | 0.813  |
|                  | 0.051  | -3.921 | -2.477 | -1.402 | -2.682 | 0.929  | -0.513 | -4.092 | -1.999 | -2.394 | -3.408 | 0.245  |
|                  | -0.053 | -3.228 | -1.853 | -1.52  | -2.495 | 0.721  | -0.742 | -4.009 | -1.798 | -2.449 | -3.179 | 0.702  |
| <i>CDHBP</i>     | 0.134  | -1.675 | -0.792 | 0.012  | -0.638 | 1.587  | 1.061  | -2.324 | -1.084 | 0.095  | -1.481 | 1.742  |
|                  | -0.358 | -1.543 | -0.744 | 0.15   | -0.423 | 0.014  | -0.042 | -2.172 | -1.264 | 0.421  | -1.627 | 1.694  |
|                  | 0.224  | -1.412 | -0.779 | 0.642  | -0.97  | 0.804  | 0.513  | -2.22  | -1.895 | 0.24   | -1.453 | 2.304  |
| <i>AKT</i>       | 0.393  | -2.671 | -3.951 | -0.36  | -3.228 | -1.8   | -2.209 | -2.073 | -4.09  | -1.511 | -6.449 | -0.543 |
|                  | 0.213  | -3.018 | -4.096 | -0.187 | -2.749 | -1.848 | -2.195 | -2.974 | -4.214 | -2.87  | -4.217 | -0.356 |
|                  | -0.605 | -2.837 | -4.076 | -0.263 | -2.847 | -1.828 | -2.223 | -3.292 | -4.152 | -2.516 | -4.196 | -0.481 |
| <i>TFR1</i>      | 0.113  | 0.931  | -0.723 | -0.217 | -0.464 | 0.291  | -0.007 | 0.698  | -0.855 | -0.903 | -0.92  | -0.018 |
|                  | -0.039 | 0.973  | -0.633 | -0.3   | -0.499 | 0.471  | -0.423 | 0.649  | -1.333 | -0.952 | -1.211 | 0.113  |
|                  | -0.074 | 0.73   | -1.056 | -0.931 | -0.811 | -0.021 | -0.478 | 0.518  | -1.292 | -1.756 | -1.419 | -0.622 |
| <i>NFE2</i>      | 0.402  | 0.25   | 0.072  | -0.829 | -1.229 | -0.626 | -1.333 | 0.806  | -1.218 | -2.049 | -0.658 | -0.319 |
|                  | -0.284 | 0.534  | -0.039 | -1.433 | -0.536 | -0.342 | -0.827 | 0.661  | -1.737 | -1.599 | -0.672 | -1.248 |
|                  | -0.118 | 0.312  | -0.122 | -0.774 | -1.902 | -0.869 | -1.347 | 0.695  | -2.576 | -1.959 | -0.541 | -0.645 |
| <i>SMAD2</i>     | -0.028 | 0.007  | -0.421 | -0.649 | -0.501 | -1.222 | 0.462  | -0.545 | -1.939 | -2.465 | -1.144 | -0.977 |
|                  | 0.007  | -0.062 | -0.809 | -1.197 | -1.409 | -0.799 | -0.515 | -0.594 | -3.103 | -2.5   | -1.13  | -1.019 |

|                  |        |        |        |        |        |        |        |        |        |        |        |        |
|------------------|--------|--------|--------|--------|--------|--------|--------|--------|--------|--------|--------|--------|
|                  | 0.021  | -0.097 | -0.58  | -1.516 | -0.98  | -1.195 | -0.37  | -0.504 | -2.153 | -1.37  | -0.998 | -0.513 |
| <i>CDK2</i>      | -0.134 | -4.681 | -4.609 | -3.126 | -4.191 | -1.987 | -1.661 | -2.89  | -4.45  | -3.022 | -5.437 | -0.453 |
|                  | 0.254  | -5.035 | -3.812 | -1.296 | -3.484 | -1.994 | -2.444 | -2.717 | -4.901 | -2.641 | -4.778 | 0.476  |
|                  | -0.12  | -6.643 | -4.804 | -3.216 | -2.597 | -2.722 | -2.812 | -2.953 | -3.237 | -2.176 | -5.173 | -1.791 |
| <i>GDF11</i>     | -0.176 | -3.759 | -1.726 | -0.222 | -2.486 | -1.384 | 0.183  | -5.178 | -0.506 | -0.208 | -2.089 | 0.296  |
|                  | 0.095  | -3.752 | -0.548 | -0.062 | -2.59  | -1.225 | 0.737  | -5.621 | -1.747 | -1.386 | -2.754 | 0.913  |
|                  | 0.081  | -3.731 | -2.572 | 1.095  | -0.836 | 0.106  | -0.483 | -3.701 | -1.185 | -0.423 | -3.433 | 1.599  |
| <i>LYAR</i>      | -0.439 | -2.283 | -1.345 | -0.589 | -1.959 | -0.628 | 0.231  | -1.463 | -2.059 | -1.67  | -2.04  | 0.296  |
|                  | -0.162 | -1.943 | -1.601 | -0.818 | -2.153 | 0.092  | 0.404  | -1.456 | -2.412 | -0.977 | -1.839 | 0.303  |
|                  | 0.601  | -1.68  | -0.658 | -0.665 | -1.779 | -0.649 | -0.296 | -1.061 | -1.733 | -1.345 | -2.151 | -0.335 |
| <i>Caspase-8</i> | -0.042 | -3.362 | -2.86  | -0.538 | -1.486 | -0.28  | -0.661 | -3.997 | -3.436 | -0.074 | -3.279 | -0.187 |
|                  | 0.069  | -2.391 | -3.006 | -2.354 | -1.132 | -0.085 | -0.848 | -3.373 | -2.022 | -1.509 | -2.703 | -0.478 |
|                  | -0.028 | -2.842 | -4.392 | -0.462 | -0.917 | 0.393  | -0.557 | -4.053 | -1.932 | -1.952 | -3.258 | -1.469 |
| <i>GDF15</i>     | 0.215  | -4.984 | -2.86  | -0.587 | -2.109 | -1.298 | -1.964 | -4.17  | -2.888 | -2.528 | -5.725 | -1.061 |
|                  | 0.028  | -5.039 | -1.821 | -0.573 | -2.054 | 0.199  | -2.165 | -5.751 | -3.165 | -2.465 | -5.289 | -1.109 |
|                  | -0.243 | -4.942 | -2.874 | -0.684 | -2.137 | -1.597 | -2.186 | -5.335 | -2.964 | -2.625 | -5.476 | -1.074 |
| <i>CD79A</i>     | 0.159  | -3.57  | -3.373 | -1.502 | -1.985 | -1.215 | -0.411 | -5.349 | -3.082 | -2.542 | -3.701 | 1.227  |
|                  | 0.076  | -3.188 | -3.45  | -1.398 | -2.019 | -1.236 | -1.167 | -5.356 | -3.089 | -2.632 | -3.688 | 1.282  |
|                  | -0.236 | -4.09  | -3.422 | 0.633  | -2.297 | -1.222 | -1.943 | -5.453 | -3.096 | -2.916 | -3.694 | 1.262  |
| <i>ZBTB7A</i>    | -0.046 | -2.341 | -3.725 | -2.893 | -1.927 | -0.721 | -0.721 | -2.581 | -3.371 | -3.995 | -2.909 | -1.121 |
|                  | 0.009  | -1.939 | -3.073 | -2.844 | -2.377 | -0.811 | -0.776 | -1.943 | -3.08  | -4.14  | -2.521 | -1.114 |
|                  | 0.037  | -2.743 | -2.754 | -2.962 | -1.781 | -0.679 | -0.818 | -2.172 | -2.678 | -4.057 | -3.124 | -1.093 |
| <i>TRAIL</i>     | -0.208 | -4.686 | -3.269 | -0.213 | -2.193 | -1.264 | 2.036  | -4.226 | -1.564 | -2.59  | -4.235 | 1.56   |
|                  | 0.125  | -4.298 | -3.262 | -0.323 | -2.255 | -1.312 | 0.476  | -4.261 | -1.904 | -2.444 | -4.374 | 0.679  |
|                  | 0.083  | -3.625 | -3.45  | -0.268 | -2.172 | -0.91  | 0.233  | -4.17  | -1.675 | -2.417 | -4.277 | 1.13   |
| <i>KLF3</i>      | -0.548 | -0.139 | -0.545 | -0.414 | 0.996  | 0.067  | 0.545  | -0.206 | -2.153 | 0.827  | 0.596  | -0.388 |
|                  | -0.118 | -0.076 | 0.356  | 2.248  | 0.33   | -0.252 | -0.411 | 0.002  | -1.744 | 0.009  | -0.7   | 2.073  |
|                  | 0.665  | -0.055 | -0.344 | -0.878 | 0.608  | 2.479  | 0.885  | -0.219 | -0.677 | 0.896  | -0.631 | 3.653  |
| <i>SMAD3</i>     | 0.014  | -1.213 | -1.952 | 0.571  | -1.347 | -0.411 | 1.155  | -3.658 | -2.548 | 0.89   | -2.682 | -0.52  |
|                  | -0.049 | -2.211 | -2.736 | 0.571  | -0.716 | 0.795  | 1.107  | -3.332 | -1.446 | 0.127  | -2.433 | -0.513 |
|                  | 0.035  | -1.927 | -2.049 | 0.557  | -1.139 | 0.393  | 1.134  | -3.595 | -1.911 | -1.037 | -2.156 | -0.485 |

**Supplemental Table 7: PCR primers used in this study**

| Primer        | 5'-sequence-3'                           | note                                                                          |
|---------------|------------------------------------------|-------------------------------------------------------------------------------|
| MluI-mCherry+ | TAGTCAATAATCAATGTCAAAAGGATCTGCGATCGCTCCG | amplification of mCherry                                                      |
| MluI-mCherry- | TTCCTGCAACGCGTCTCCCCAGCATGCCTGCTATTG     |                                                                               |
| MluI-pegRNA+  | GACGCGTTGCAGGAAGAGGGCCTATTTCCCATGATTCCTT | amplification of pegRNA                                                       |
| MluI-pegRNA-  | CGCGATGTACGGGCCAGATATACGCGCCCAAGCTTAAAAA |                                                                               |
| nick-MluI-F   | TAGCAGGCATGCTGGGGAGAGATCCGACGCGCCATCTCTA | amplification of nick sgRNA                                                   |
| nick-MluI-R   | GGCCCTCTTCCTGCAACGCGGACTAGTAAAAAAAGCACCG |                                                                               |
| 654/745-F     | GACCAAATCAGGGTAATTTTGC                   | sanger sequencing for IVS-II-654/IVS-II-745 mutation                          |
| 654/745-R     | GGCCTAGCTTGGA CT CAGAA                   |                                                                               |
| 745-RT-F      | CTGAGGAGAAGTCTGCCGTTA                    | sanger sequencing for IVS-II-745 mutation (RT-PCR)                            |
| 745-RT-R      | GCCACCACTTTCTGATAGGC                     |                                                                               |
| sampling-F    | ACTCCTAAGCCAGTGCCAGA                     | sanger sequencing for beta-thalassemia mutation, except IVS-II-654/IVS-II-745 |
| sampling-R    | TCATTCTGTCTGTTTCCCATTCT                  |                                                                               |
| beta-RT-all-F | CTGACACA ACT GTGTTCACTAGCA               | sanger sequencing for beta-thalassemia mutation, except IVS-II-745 (RT-PCR)   |
| beta-RT-all-R | GATGCTCAAGGCCCTTCATA                     |                                                                               |
